# Supplementary material for: Tuberculosis treatment management in primary healthcare sectors: a mixed-methods study investigating delivery status and barriers from organisational and patient perspectives
Source: PubMed Central journal article supplement — BMJ Open. 2022 Apr 19;12(4):e053797. doi: 10.1136/bmjopen-2021-053797 (PMC9021800; doi:10.1136/bmjopen-2021-053797), 2022-04-19
Supplement: bmjopen-2021-053797.draft_revisions.pdf [file bmjopen-2021-053797.draft_revisions.pdf]

# BMJ Open

BMJ Open is committed to open peer review. As part of this commitment we make the peer review history of every article we publish publicly available.

When an article is published we post the peer reviewers' comments and the authors' responses online. We also post the versions of the paper that were used during peer review. These are the versions that the peer review comments apply to.

The versions of the paper that follow are the versions that were submitted during the peer review process. They are not the versions of record or the final published versions. They should not be cited or distributed as the published version of this manuscript.

BMJ Open is an open access journal and the full, final, typeset and author-corrected version of record of the manuscript is available on our site with no access controls, subscription charges or pay-per-view fees (<http://bmjopen.bmj.com>).

If you have any questions on BMJ Open's open peer review process please email [info.bmjopen@bmj.com](mailto:info.bmjopen@bmj.com)

# BMJ Open

## Tuberculosis treatment management in primary healthcare sectors: a mixed-methods study investigating delivery status and barriers from organizational and patient perspectives

|                               |                                                                                                                                                                                                                                                                                                                                                                                                                                                                                                                                                                                                                                                                                                                                                                                                                                                                                                                                                                                                                                                                                                                                                                                                                                                                                       |
|-------------------------------|---------------------------------------------------------------------------------------------------------------------------------------------------------------------------------------------------------------------------------------------------------------------------------------------------------------------------------------------------------------------------------------------------------------------------------------------------------------------------------------------------------------------------------------------------------------------------------------------------------------------------------------------------------------------------------------------------------------------------------------------------------------------------------------------------------------------------------------------------------------------------------------------------------------------------------------------------------------------------------------------------------------------------------------------------------------------------------------------------------------------------------------------------------------------------------------------------------------------------------------------------------------------------------------|
| Journal:                      | <i>BMJ Open</i>                                                                                                                                                                                                                                                                                                                                                                                                                                                                                                                                                                                                                                                                                                                                                                                                                                                                                                                                                                                                                                                                                                                                                                                                                                                                       |
| Manuscript ID                 | bmjopen-2021-053797                                                                                                                                                                                                                                                                                                                                                                                                                                                                                                                                                                                                                                                                                                                                                                                                                                                                                                                                                                                                                                                                                                                                                                                                                                                                   |
| Article Type:                 | Original research                                                                                                                                                                                                                                                                                                                                                                                                                                                                                                                                                                                                                                                                                                                                                                                                                                                                                                                                                                                                                                                                                                                                                                                                                                                                     |
| Date Submitted by the Author: | 07-Jun-2021                                                                                                                                                                                                                                                                                                                                                                                                                                                                                                                                                                                                                                                                                                                                                                                                                                                                                                                                                                                                                                                                                                                                                                                                                                                                           |
| Complete List of Authors:     | Zhou, Jiani; Army Medical University, Department of Social Medicine and Health Service Management<br>Pu, Jie; Army Medical University, Department of Social Medicine and Health Service Management<br>Wang, Qingya; Chongqing institute of Tuberculosis prevention and Treatment, Department of districts and counties<br>Zhang, Rui; Army Medical University, Department of Social Medicine and Health Service Management<br>Liu, Shili; Army Medical University, Department of Social Medicine and Health Service Management<br>Wang, Geng; Army Medical University, Department of Social Medicine and Health Service Management<br>Zhang, Ting; Chongqing Institute of Tuberculosis Prevention and Treatment, Department of districts and counties<br>Chen, Yong; Army Medical University, Department of Social Medicine and Health Service Management<br>Xing, Wei; Army Medical University, Department of Social Medicine and Health Service Management<br>Liu, Jiaqing; Army Medical University, Department of Social Medicine and Health Service Management<br>Hu, Daiyu; Chongqing Institute of Tuberculosis Prevention and Treatment, Department of districts and counties<br>Li, Ying; Army Medical University, Department of Social Medicine and Health Service Management |
| Keywords:                     | Tuberculosis < INFECTIOUS DISEASES, PRIMARY CARE, HEALTH SERVICES ADMINISTRATION & MANAGEMENT                                                                                                                                                                                                                                                                                                                                                                                                                                                                                                                                                                                                                                                                                                                                                                                                                                                                                                                                                                                                                                                                                                                                                                                         |
|                               |                                                                                                                                                                                                                                                                                                                                                                                                                                                                                                                                                                                                                                                                                                                                                                                                                                                                                                                                                                                                                                                                                                                                                                                                                                                                                       |

SCHOLARONE™  
Manuscripts

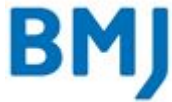

I, the Submitting Author has the right to grant and does grant on behalf of all authors of the Work (as defined in the below author licence), an exclusive licence and/or a non-exclusive licence for contributions from authors who are: i) UK Crown employees; ii) where BMJ has agreed a CC-BY licence shall apply, and/or iii) in accordance with the terms applicable for US Federal Government officers or employees acting as part of their official duties; on a worldwide, perpetual, irrevocable, royalty-free basis to BMJ Publishing Group Ltd ("BMJ") its licensees and where the relevant Journal is co-owned by BMJ to the co-owners of the Journal, to publish the Work in this journal and any other BMJ products and to exploit all rights, as set out in our [licence](#).

The Submitting Author accepts and understands that any supply made under these terms is made by BMJ to the Submitting Author unless you are acting as an employee on behalf of your employer or a postgraduate student of an affiliated institution which is paying any applicable article publishing charge ("APC") for Open Access articles. Where the Submitting Author wishes to make the Work available on an Open Access basis (and intends to pay the relevant APC), the terms of reuse of such Open Access shall be governed by a Creative Commons licence – details of these licences and which [Creative Commons](#) licence will apply to this Work are set out in our licence referred to above.

Other than as permitted in any relevant BMJ Author's Self Archiving Policies, I confirm this Work has not been accepted for publication elsewhere, is not being considered for publication elsewhere and does not duplicate material already published. I confirm all authors consent to publication of this Work and authorise the granting of this licence.

1  
2  
3  
4  
5  
6  
7  
8  
9  
10  
11  
12  
13  
14  
15  
16  
17  
18  
19  
20  
21  
22  
23  
24  
25  
26  
27  
28  
29  
30  
31  
32  
33  
34  
35  
36  
37  
38  
39  
40  
41  
42  
43  
44  
45  
46  
47  
48  
49  
50  
51  
52  
53  
54  
55  
56  
57  
58  
59  
60

# **Tuberculosis treatment management in primary health care sectors: a mixed-methods study investigating delivery status and barriers from organizational and patient perspectives**

6 Jiani Zhou<sup>1</sup>, Jie Pu<sup>1</sup>, Qingya Wang<sup>2</sup>, Rui Zhang<sup>1</sup>, Shili Liu<sup>1</sup>, Geng Wang<sup>1</sup>, Ting Zhang<sup>2</sup>, Yong  
7 Chen<sup>1</sup>, Wei Xing<sup>1</sup>, Jiaqing Liu<sup>1</sup>, Daiyu Hu<sup>2§</sup>, YingLi<sup>1§</sup>

8 <sup>1</sup> Department of Social Medicine and Health Service Management, Army Medical University  
9 (Third Military Medical University), Chongqing, China.

10 <sup>2</sup> Department of districts and counties, Chongqing Institute of TB Prevention and Treatment,  
11 Jiulongpo District, Chongqing, China.

12 § Correspondence: Daiyu Hu, Chongqing Institute of TB Prevention and Treatment,  
13 Jiulongpo District, Chongqing, China (E-mail:hukaixiu@126.com); Ying Li, Department of  
14 Social Medicine and Health Service Management, Army Medical University (Third Military  
15 Medical University), China (E-mail:lilyliying2012@163.com).

1  
2  
3  
4  
5  
6  
7  
8  
9  
10  
11  
12  
13  
14  
15  
16  
17  
18  
19  
20  
21  
22  
23  
24  
25  
26  
27  
28  
29  
30  
31  
32  
33  
34  
35  
36  
37  
38  
39  
40  
41  
42  
43  
44  
45  
46  
47  
48  
49  
50  
51  
52  
53  
54  
55  
56  
57  
58  
59  
60

22 **Abstract**

23 **Objective** Tuberculosis (TB) treatment management service (TTMS) is crucial to improve  
24 patient adherence to treatment. Under the TB integrated control model in China, healthcare  
25 workers (HCWs) in primary healthcare (PHC) sectors are responsible for TTMS delivering.  
26 This mixed method study aims to explore the status of and barriers to TTMS delivery faced  
27 by HCWs in PHC sectors from the health organizational and patient perspectives.

28 **Design** We completed 459 questionnaire survey with HCWs and 261 with TB patients in  
29 PHC sectors, and we also conducted 16 semi-structured interviews with health organizational  
30 leaders, HCWs and patients. SPSS 22.0 and the framework approach were used for data  
31 analysis.

32 **Setting** Primary healthcare sectors in West China

33 **Results** Our results showed that TTMS delivery rate by HCWs in PHC sectors was <90%  
34 (88.4%) on average, and the delivery rates of intensive and continuation phase DOT were  
35 only 54.7% and 53.0% respectively. HCWs with high working satisfaction and junior title  
36 were more likely to deliver first-time home visit and DOT services. Our results suggested that  
37 barriers to TTMS delivery in organizational level included limited patient-centered  
38 approaches, poor cross-sectional coordination, inadequate resources and incentives, and strict  
39 performance assessment. In patient level, barriers include low socioeconomic characteristics,  
40 poor health literacy, and TB-related social stigma.

41 **Conclusion:** TTMS in West China still need further improvement, and this study highlighted  
42 specific barriers to TTMS delivery in PHC sectors. Comprehensive measures are urgent

1  
2  
3  
4  
5 43 needed to address those barriers in organizational and patient levels to promote TB control  
6  
7  
8 44 in West China.  
9

10 45 **Key words:** tuberculosis, treatment management, healthcare worker, primary healthcare  
11  
12

13 46 **Strengths and limitations of this study**  
14

15  
16 47 ● This is a mixed method study on accessing the status of and barriers to tuberculosis  
17  
18 48 treatment management services (TTMS) delivery by healthcare workers (HCWs) in  
19  
20  
21 49 primary healthcare sectors (PHC) in West China.  
22

23  
24 50 ● This study collected both perspectives from organizations and patients followed by using  
25  
26 51 the PRISM model to evaluate specific barriers to TTMS delivery.  
27

28  
29 52 ● We collected a total of 720 questionnaires with HCWs and patients, and conducted 16  
30  
31 53 interviews with leaders, HCWs and patients in totally 71 PHC sectors.  
32

33  
34 54 ● Further studies are required to provide more evidence for producing more effective TB  
35  
36 55 control strategies since well-evidenced implementation strategies that able to address  
37  
38  
39 56 current barriers in TTMS delivery were not able to be provided in this study.  
40

41 57  
42

43 58  
44

45 59  
46

47 60  
48

49 61  
50

51 62  
52

53 63  
54  
55  
56  
57  
58  
59  
60

## 64 **Introduction**

65 Tuberculosis (TB) is a major infectious disease that seriously endangers the health of the  
66 public. World Health Organization's Global Tuberculosis Report 2020 indicates that TB, one  
67 of the top 10 causes of death, is the leading cause of a death from a single infectious agent  
68 (*Mycobacterium tuberculosis*), ranking above HIV/AIDS [1]. Globally, around 10 million  
69 people fell ill with TB each year [1]. In recent years, China has implemented various  
70 prevention and control measures to address TB epidemic in China, cases notification has  
71 decreased from 70.6/100,000 population in 2012 to 59.3/100,000 population in 2018 with a  
72 treatment success rate above 90% [1]. However, the situation of TB epidemic in China is still  
73 urgent, ranked the third and accounted for 8.4% of the global TB burden [1]. The problem of  
74 drug-resistant TB (DR-TB) is prominent, the medical burden of patients is heavy, and the  
75 task of TB prevention and control is difficult [2].

76 The goal of China's latest Action Plan to Stop TB (2019-2022) is to reduce the incidence of  
77 TB nationwide to less than 55/100,000 population by 2022 and maintain a low mortality rate  
78 below 3/100,000 population [2]. To accomplish this goal, TB prevention and control program  
79 has been further improved with enhanced services capacity, strengthened the prevention and  
80 control measures for key populations and key areas, advanced the standardized diagnosis and  
81 treatment coverage, and increased the public awareness level of tuberculosis prevention and  
82 control [2]. Patients' adherence to anti-TB treatment plays an important role to cure and avoid  
83 DR-TB, hence treatment management is essentially necessary for TB patients to ensure  
84 treatment adherence, monitor adverse side-effects from treatment, and avoid development of

1  
2  
3  
4  
5 85 DR-TB [3]. Since Chinese National 12th Five-Year TB Control Plan (2011-2015) came out  
6  
7  
8 86 in 2011, TB control model in China started using the integrated TB control model in most  
9  
10  
11 87 regions [4]. Under the integrated TB control model, the Centers of Disease Control (CDCs)  
12  
13  
14 88 are responsible for TB program governance, surveillance, training and health promotion; the  
15  
16 89 TB designated hospitals are responsible for diagnosis and treatment; and the Primary  
17  
18 90 Healthcare (PHC) sectors are responsible for referrals, tracing, health education and TB  
19  
20  
21 91 treatment management services (TTMS) [4]. Later, China's National 13th Five-Year TB  
22  
23  
24 92 Control Plan (2016-2020) combined with the Action Plan to Stop TB (2019-2022) requested  
25  
26 93 to further strengthen TB prevention and control which emphasized TTMS and strengthened  
27  
28  
29 94 the implementation of various measures to reduce TB epidemic in China [2, 5]. In addition,  
30  
31  
32 95 the new Chinese National Basic Public Health Service (BPHS) Guideline issued in 2017  
33  
34 96 specifies that TTMS provided by healthcare workers (HCWs) in PHC sectors into 7  
35  
36 97 themes, including: the first-time home visit, health education, supervising drug intake,  
37  
38  
39 98 follow-up supervision, case closing evaluation, other services and services among patient's  
40  
41  
42 99 family members [6]. TTMS is one of the key BPHS programs for all residents in China (one  
43  
44  
45 100 of the priorities of the new health reform launched in 2009) which are delivered by HCWs in  
46  
47 101 PHC sectors [5, 6]. The BPHS guideline sets a target to accomplish both standard TTMS rate  
48  
49  
50 102 and treatment success rate above 90% [5, 6]. TTMS for diagnosed TB patients are delivered  
51  
52  
53 103 by HCWs in PHC sector under the supervision of CDC with coordination from other  
54  
55 104 departments, such as assistances from the TB designated hospital to deal with patients  
56  
57  
58 105 side-effects and supports from department of education to conduct health education to student  
59  
60



1  
2  
3  
4  
5 106 population [6]. In China, PHC sectors include the community health centers (CHCs) and  
6  
7  
8 107 stations in urban areas, township hospital centers (THCs) and village health clinics in rural  
9  
10  
11 108 areas [3]. The HCWs in PHC sectors who are in charge of TTMS delivery involve HCWs in  
12  
13 109 CHCs, THCs and village health clinics.

14  
15  
16 110 Study in Jiangxi indicated that TTMS under the integrated TB control model did improve  
17  
18 111 treatment outcomes [7]. Study in Wuhan pointed that TTMS was crucial important for  
19  
20  
21 112 monitoring treatment complications and reducing the development of DR-TB [8, 9]. Other  
22  
23  
24 113 studies showed that in more developed areas in China, TTMS coverage was highly improved  
25  
26 114 and produced impressive effects [7, 8, 10-13]. Few studies reported the delivery status to  
27  
28  
29 115 TTMS delivery in resource-limited and mountain regions with high TB/DR-TB burden in  
30  
31  
32 116 China. One study found that only 37.1% of TB patients received TTMS by HCWs in West  
33  
34 117 China [14] and study in Chongqing found that 34.3% of TB patients never received TTMS by  
35  
36  
37 118 HCWs [15]. However, very few studies focus on the perspective of HCWs to evaluate the  
38  
39 119 current TTMS program under the integrated TB control model. Therefore, this study not only  
40  
41  
42 120 aim to assess the delivery status of TTMS program from the perspectives of both  
43  
44  
45 121 organizations and patients, but also to explore the specific barriers to TTMS delivery faced  
46  
47 122 by HCWs in PHC sectors to provide evidence for promote TB control and treatment  
48  
49  
50 123 outcome.

## 51 52 124 **Methods**

### 53 54 55 125 **Study design**

56  
57 126 Our study utilized mixed research methods to collect data from June 2018 to December 2018.  
58  
59  
60

1  
2  
3  
4  
5 127 Questionnaire surveys and semi-structured in-depth interviews were conducted to evaluate  
6  
7  
8 128 the delivery of TTMS in PHC sectors from both health organizational (CHWs and leaders)  
9  
10  
11 129 and patient's perspectives.

### 13 130 **Study Setting**

14  
15  
16 131 The prevalence of TB in the western region was significantly higher than the central and  
17  
18 132 eastern regions in China [16]. We purposively selected Chongqing municipality (region with  
19  
20  
21 133 relatively developed socioeconomic status with Gross Domestic Product (GDP) at 2.04  
22  
23 134 trillion RMB and per capita GDP at 66.2 thousand RMB) and Guizhou province (region with  
24  
25  
26 135 relatively less developed socioeconomic status with GDP at 1.48 trillion RMB and per capita  
27  
28 136 GDP at 41.4 thousand RMB) as the study regions [17]. Chongqing's reported TB incidence  
29  
30  
31 137 rate has dropped from 85.57/100,000 in 2012 to 73.37/100,000 in 2018, and the treatment  
32  
33  
34 138 success rate has remained above 90%. However, the current epidemic situation of TB in  
35  
36  
37 139 Chongqing is still severe, with an average of about 23,000 new cases reported each year, and  
38  
39  
40 140 the reported incidence of TB in 2018 ranked 8th in the country [2]. The TB epidemic status in  
41  
42 141 Guizhou was more severe which TB incidence ranked 3rd in China [18]. According to the  
43  
44 142 fifth national TB epidemiological survey, the active and smear positive TB prevalence in  
45  
46  
47 143 Guizhou were 1226/100,000 and 231/100,000 [19]

48  
49  
50 144 A stratified random sampling method was used to select study sites based on socioeconomic  
51  
52 145 developing status. All counties/districts in Chongqing municipality and Guizhou province  
53  
54  
55 146 were grouped into three levels according to the per capita GDP [17]. A total of twelve  
56  
57 147 districts/counties were included in this study. All of the PHC sectors (included both CHCs  
58  
59  
60

1  
2  
3  
4  
5 148 and THCs) in the 12 selected counties/districts, totally 71 PHC sectors were included in this  
6  
7  
8 149 study.

## 10 150 **Study participants and data Collection**

### 12 151 *Quantitative study*

13  
14  
15 152 All adult pulmonary TB patients who met the following criteria were targeted for recruitment  
16  
17  
18 153 from the 71 PHC sectors in the 12 selected counties/districts: (1) registered at TB  
19  
20  
21 154 dispensaries and were diagnosed as drug-sensitive pulmonary TB patients according to  
22  
23  
24 155 national TB diagnosis standards, (2) completed standard anti-TB drug treatment for at least 4  
25  
26 156 months which indicated that received TTMS for both intensive (first 2 months) and  
27  
28  
29 157 continuation phases (following 4 months), (3) aged 15 years and older. Patients who: (1) with  
30  
31  
32 158 extra-pulmonary TB, (2) could not express themselves clearly (had disturbance of  
33  
34  
35 159 consciousness or difficulties with speech or hearing), (3) unwilling to participated in the  
36  
37 160 study were excluded. Patient recruitment was facilitated by TB dispensaries in the study  
38  
39  
40 161 counties/districts. First, research group members provided a detailed explanation about the  
41  
42 162 study objectives to all potential participants. Then, those who were willing to participate in  
43  
44  
45 163 the study were asked to read and sign the informed consent form to assure of confidentiality.

46  
47 164 All HCWs who were working at the selected 71 PHC sectors and met the following criteria  
48  
49  
50 165 were targeted for recruitment: (1) responsible for the TB prevention and control program, (2)  
51  
52 166 in charge of TTMS delivery to TB patients. HCWs who: (1) didn't work at the PHC sectors  
53  
54  
55 167 in selected county/district, (2) didn't responsible for the TB prevention and control program,  
56  
57 168 (3) didn't provide TTMS for TB patients were excluded in this study.

1  
2  
3  
4  
5 169 Structured questionnaires were conducted to collect data among the participated TB patients  
6  
7  
8 170 and HCWs. Among TB patients, structured survey involved demographic information (such  
9  
10  
11 171 as gender, age, and residence), and TTMS received from HCWs during treatment (such as  
12  
13 172 intensive phase DOT and continuation phase DOT). Among HCWs, the questionnaire  
14  
15  
16 173 included demographic and working-related information (such as gender, age, professional  
17  
18 174 title, and working years), working satisfaction, and delivery situation of TTMS (such as the  
19  
20  
21 175 first-time home visit). Questionnaires were designed by our research team based on the  
22  
23  
24 176 existing literature reports, and then consulted related experts. All questionnaires were  
25  
26 177 executed by trained investigators from our research group in a meeting room or clinic room at  
27  
28  
29 178 each PHC sector. HCWs, who were willing to voluntary participated in the study, were asked  
30  
31  
32 179 to read the informed consent form and then sign the informed consent form. Each completed  
33  
34 180 questionnaire was checked and examined by trained investigators for quality control.

### 181 *Qualitative study*

38  
39 182 In-depth interviews were utilized to explore the current status and identify barriers to the  
40  
41  
42 183 TTMS delivery from HCWs to TB patients. Purposive sampling method was used to selected  
43  
44  
45 184 participants for in-depth interview and the sample size was decided by the point of data  
46  
47 185 ‘saturation’. In-depth interviews were conducted with nine purposely selected local CDC and  
48  
49  
50 186 Health Commission leaders, five HCWs and two TB patients.

51  
52 187 Semi-structured topic guides with open-ended questions were used for interviews. The  
53  
54  
55 188 guiding framework for the topic design was the Practical Robust Implementation and  
56  
57 189 Sustainability Model (PRISM) [20]. This model considered how the intervention design,  
58  
59  
60

1  
2  
3  
4  
5 190 recipients, external environment, and implementation and sustainability infrastructure  
6  
7  
8 191 influence health program implementation and success, which widely used as theoretical  
9  
10  
11 192 framework in implementation research [20-22]. With the guide of the PRISM, this study  
12  
13  
14 193 collected data on barriers on TTMS delivery in the following aspects: (1) intervention design;  
15  
16 194 (2) recipients; (3) external environment; and (4) implementation and sustainability  
17  
18  
19 195 infrastructure. The adaptation of PRISM for this study is illustrated in Figure1. All interviews  
20  
21 196 were conducted in Mandarin or local language at the meeting rooms in PHC sectors. Each  
22  
23  
24 197 interview lasted about 40-60 minutes and was audio-recorded with consent of the  
25  
26 198 participants.

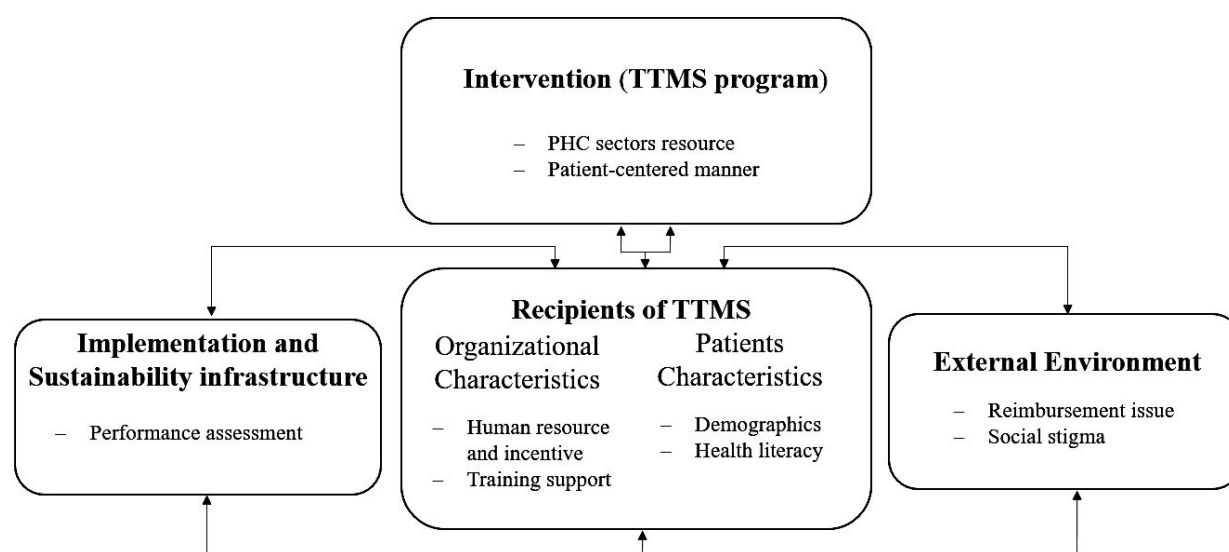

199  
200 **Figure 1** Adapted PRISM for barriers on TTMS delivery in PHC sectors. This figure presents  
201 the four core domains of the Practical Robust Implementation and Sustainability Model  
202 (PRISM) for barriers on TTMS delivery in PHC sectors, including: 1) TTMS program  
203 design; 2) the recipients, 3) the external environment, and 4) the implementation and  
204 sustainability infrastructure. Activated elements for each domains were presented in boxes.  
205 Notes: *TTMS* refers to tuberculosis treatment management service; *PHC* refers to primary  
206 healthcare; *HCW* refers to healthcare worker).

## 207 Data analysis

1  
2  
3  
4  
5 208 ***Quantitative analysis***  
6  
7

8 209 Data were entered using Epi Data 3.1 and then analyzed using the Statistical Package for the  
9  
10 210 Social Sciences (SPSS 22.0 (IBM Corporation, Armonk, NY, USA)). Missing data were  
11  
12  
13 211 excluded during analyze. A two-tailed probability level of  $p < 0.05$  was chosen as the level of  
14  
15  
16 212 statistical significance. Missing data were excluded from analysis. Descriptive statistics were  
17  
18 213 used to describe study participants' demographic characteristics and TTMS delivery rates.  
19  
20  
21 214 According to the 13th Five-Year TB Prevention and Control Plan, the targeted TTMS  
22  
23  
24 215 delivery rate from HCWs to TB patients is  $>90\%$  [5]. Therefore, delivery rate below 90% is  
25  
26 216 described as lower delivery rate in this manuscript. Factors associated with lower delivery  
27  
28  
29 217 rate ( $<90\%$ ) screened by the Chi-square test ( $p < 0.05$ ) (Appendix A) were entered into  
30  
31 218 multivariate logistic regression models (delivery rate  $<90\% = 1$ , delivery rate  $>90\% = 0$ ),  
32  
33  
34 219 which were used to examine the effects of those factors on TTMS delivery.  
35

36 220 ***Qualitative analysis***  
37  
38

39 221 The framework approach was used to analyze all qualitative data following a five steps  
40  
41  
42 222 process: (1) familiarization, (2) creating theoretical framework, (3) indexing, (4)  
43  
44 223 summarizing and (5) data synthesis and interpretation [23-24]. Following that, all interviews  
45  
46  
47 224 were carefully transcribed into Word Documents, reviewed for accuracy, and then being  
48  
49  
50 225 coded and classified by our research team members. We identified themes on TTMS delivery  
51  
52 226 barriers for four domains of the PRISM, including: (1) intervention design (PHC sectors  
53  
54  
55 227 resource and patient-centered manner); (2) the recipients (human resource and incentives,  
56  
57 228 training support, socio-economy and health literacy); (3) external environment (health  
58  
59  
60

1  
2  
3  
4  
5 229 insurance, cross-sectional coordination, and social stigma); and (4) implementation and  
6  
7  
8 230 sustainability infrastructure (performance assessment). All the names of participants were  
9  
10  
11 231 removed in quotations of the results to keep anonymity.

## 12 13 232 **Patient and public involvement**

14  
15  
16 233 There were no patients or public involvement in the design, conduct, reporting and in the  
17  
18 234 dissemination plans of this research.

## 19 20 21 235 **Results**

### 22 23 236 **Characteristics of participants**

#### 24 25 237 *Participants for the quantitative study*

26  
27  
28 238 Total of 261 HCWs and 459 TB patients completed the questionnaire survey (Table 1).  
29  
30  
31 239 Among the HCWs, 66.4% (172) were female, 71.5% (178) were aged 20-40 years old, 70%  
32  
33  
34 240 (189) worked at THCs, 50.0% and 35.8% had junior and non-professional titles respectively.  
35  
36  
37 241 Near 60% of the HCWs had junior college education and over 80% had medical school  
38  
39 242 education background (32.4% majored in clinical medicine and 30.5% majored in nursing).  
40  
41  
42 243 More than half (56.4%) of the HCWs undertook 2-3 BPHS programs in PHC sector, and only  
43  
44 244 7.6% were dedicatedly in charge of TB program. The majority (67.5%) had a monthly  
45  
46  
47 245 income of 2500-4500 CNY, and notably, 40.5% reported low working satisfaction.  
48  
49  
50 246 Among the TB patients, the majority of the patients were male (70%), married (69.7%), Han  
51  
52 247 ethnicity (78.2%), and 41.6% were aged  $\geq 60$ . 82.4% of the patients were rural residences  
53  
54  
55 248 and 95.2% were permanent residences. Almost 70% of the patients were farmer/migrant  
56  
57  
58 249 workers, and 56.0% had only primary/below education.  
59  
60

250 ***Participants for the qualitative study***

251 9 leaders, 5 HCWs, and 2 patients were interviewed. Most leaders were male (7/9) with  
 252 deputy senior titles (5/9) and worked for 7.6 years on average. The majority of HCWs were  
 253 technical secondary school educated (4/5) and majored in clinical medicine (4/5), 4/5 came  
 254 from CHCs with had none or junior professional titles. Besides, among the 2 interviewed  
 255 patients, aged mid-20s and late-50s respectively, both of them completed anti-TB therapy.

256 **Table 1** Demographic characteristics of the participants for quantitative study

| Demographic characteristic                 | Number | Percentage |
|--------------------------------------------|--------|------------|
| <b><i>HCWs in questionnaire survey</i></b> |        |            |
| Gender (n=259)                             |        |            |
| female                                     | 172    | 66.4       |
| male                                       | 87     | 33.6       |
| Age (n=249)                                |        |            |
| 20-29                                      | 94     | 37.8       |
| 30-39                                      | 84     | 33.7       |
| 40-50                                      | 52     | 20.9       |
| >50                                        | 19     | 7.6        |
| Education (n=259)                          |        |            |
| Technical secondary school or below        | 60     | 23.2       |
| Junior college                             | 155    | 59.8       |
| Undergraduate college or above             | 44     | 17.0       |
| Medical school education (n=247)           |        |            |
| Yes                                        | 202    | 81.8       |
| No                                         | 45     | 18.2       |
| Major (n=256)                              |        |            |
| Clinical Medicine                          | 83     | 32.4       |
| Nursing                                    | 78     | 30.5       |
| Public Health                              | 33     | 12.9       |
| Chinese Medicine                           | 27     | 10.5       |
| Other                                      | 17     | 6.6        |
| Region (n=261)                             |        |            |
| Relatively developed                       | 93     | 35.6       |
| Medium developed                           | 89     | 34.1       |
| Less developed                             | 79     | 30.3       |
| Working place (n=261)                      |        |            |



1  
2  
3  
4  
5  
6  
7  
8  
9  
10  
11  
12  
13  
14  
15  
16  
17  
18  
19  
20  
21  
22  
23  
24  
25  
26  
27  
28  
29  
30  
31  
32  
33  
34  
35  
36  
37  
38  
39  
40  
41  
42  
43  
44  
45  
46  
47  
48  
49  
50  
51  
52  
53  
54  
55  
56  
57  
58  
59  
60

|                                                   |     |      |
|---------------------------------------------------|-----|------|
| Township health center                            | 189 | 72.4 |
| Community health center                           | 72  | 27.6 |
| Professional Title (n=240)                        |     |      |
| Non                                               | 86  | 35.8 |
| Junior                                            | 120 | 50.0 |
| Intermediate                                      | 31  | 12.9 |
| Deputy senior                                     | 3   | 1.3  |
| Number of BPHS programs undertook (n=225)         |     |      |
| TB program only                                   | 17  | 7.6  |
| 2-3                                               | 127 | 56.4 |
| ≥4                                                | 80  | 36.0 |
| Monthly Income (n=242)                            |     |      |
| <2500                                             | 52  | 21.5 |
| 2500-3500                                         | 89  | 36.8 |
| 3500-4500                                         | 74  | 30.6 |
| >4500                                             | 27  | 11.2 |
| Working satisfaction (n=259)                      |     |      |
| High satisfaction                                 | 58  | 22.4 |
| Middle satisfaction                               | 96  | 37.1 |
| Low satisfaction                                  | 105 | 40.5 |
| <b><i>TB patients in questionnaire survey</i></b> |     |      |
| Gender (n=459)                                    |     |      |
| Male                                              | 324 | 70.6 |
| Female                                            | 135 | 29.4 |
| Age (n=459)                                       |     |      |
| <40                                               | 94  | 20.5 |
| 40-49                                             | 96  | 20.9 |
| 50-59                                             | 78  | 17   |
| ≥60                                               | 191 | 41.6 |
| Ethnicity (n=459)                                 |     |      |
| Han                                               | 359 | 78.2 |
| Ethnic minority                                   | 100 | 21.8 |
| Marital status (n=459)                            |     |      |
| Single                                            | 69  | 15.0 |
| Married                                           | 320 | 69.7 |
| Divorced/Widowed                                  | 70  | 15.3 |
| Residence (n=459)                                 |     |      |
| Urban                                             | 81  | 17.6 |
| Rural                                             | 378 | 82.4 |
| Registered information (n=459)                    |     |      |
| Permanent resident                                | 437 | 95.2 |
| Migrant                                           | 22  | 4.8  |

|                       |     |      |
|-----------------------|-----|------|
| Education (n=459)     |     |      |
| Primary and below     | 257 | 56.0 |
| Junior middle school  | 125 | 27.2 |
| High school and above | 77  | 16.8 |
| Occupation (n=459)    |     |      |
| Staff/Cadre/Retiree   | 50  | 10.9 |
| Self-employed         | 10  | 2.2  |
| Farmer/Migrant worker | 315 | 68.6 |
| Student               | 20  | 4.4  |
| Others                | 64  | 13.9 |

Note: *TB* refers to tuberculosis, *HCW* refers to health care worker, *BPHS* refers to basic public health services.

## 257 Quantitative results about TTMS delivery status

258 TB patient's survey showed that 76.0% (349) of the patients ever received TTMS from  
 259 HCWs in CHCs during the whole course of treatment (it was 83.7% and 76.7% during their  
 260 intensive and continuation phase respectively). Just around 40.0% ever received TTMS from  
 261 HCWs in THCs/village clinics during their whole course of treatment (it was 45.1% and  
 262 42.3% during intensive and continuation phase respectively). Only 17.0% received standard  
 263 TTMS from HCWs during the whole course of treatment (it was 18.1% and 55.8% for  
 264 intensive and continuation phase respectively). 2.8% were never received TTMS from HCWs  
 265 (it was 3.9 % and 7.2% during intensive and continuation phase respectively). (Table 2)

266 **Table 2** TTMS TB patient received from HCWs during treatment (n=459)

| Variable                                             | Number | Percentage |
|------------------------------------------------------|--------|------------|
| Ever received TTMS from HCWs in CHCs                 |        |            |
| Intensive phase                                      | 384    | 83.7       |
| Continuation phase                                   | 352    | 76.7       |
| Whole course of treatment                            | 349    | 76.0       |
| Ever received TTMS from HCWs in THCs/village clinics |        |            |
| Intensive phase                                      | 207    | 45.1       |
| Continuation phase                                   | 194    | 42.3       |
| Whole course of treatment                            | 189    | 41.2       |

## Received standard TTMS from HCWs

|                               |     |      |
|-------------------------------|-----|------|
| Intensive phase               | 83  | 18.1 |
| Continuation phase            | 256 | 55.8 |
| Whole course of treatment     | 78  | 17.0 |
| Never received TTMS from HCWs |     |      |
| Intensive phase               | 18  | 3.9  |
| Continuation phase            | 33  | 7.2  |
| Whole course of treatment     | 13  | 2.8  |

Note: *TB* refers to tuberculosis, *TTMS* refers to tuberculosis treatment management services, *CHC* refers to community health center, *THC* refers to township health center, *HCW* refers to health care worker.

267 HCWs' survey showed that the average delivery rate of TTMS (involved totally 60 service  
 268 items) in PHC sectors was 88.4 %, and 13 TTMS items reported a lower delivery rate  
 269 (<90%). Notably, the delivery rates of DOT in intensive phase and continuation phase were  
 270 low, with only 54.7% and 53.0% respectively. Besides, less than half (44.9%) of HCWs in  
 271 PHC sectors provided service of collecting patients' sputum samples during the follow-up  
 272 supervision. Less than half of the HCWs provided food or transport assistances for poor TB  
 273 patient (45.2%), provided subsistence allowance or psychological support for migrant patient  
 274 (49.6%), and provided injection treatment for MDR-TB patient (41.0%). Moreover, less than  
 275 60% provided supervision for newly released prison patient (58.9%) and established platform  
 276 for TB patient communication (57.8%). (Table 3)

**Table 3** TTMS with lower delivery rate provided by HCWs in PHC sectors (n=239)

| Services                                     | Delivery rate N (%) |
|----------------------------------------------|---------------------|
| <b><i>First time home visit</i></b>          |                     |
| Patients' peer supervision establish (n=235) | 185 (78.7)          |
| <b><i>DOT</i></b>                            |                     |
| Intensive phase DOT (n=236)                  | 129 (54.7)          |
| Continuation phase DOT (n=236)               | 125 (53.0)          |
| Regular medicine delivery (n=234)            | 160 (68.4)          |
| <b><i>Follow-up supervision</i></b>          |                     |
| Sputum sample collection (n=236)             | 106 (44.9)          |

**Others**

|                                                                                                                           |            |
|---------------------------------------------------------------------------------------------------------------------------|------------|
| Providing food or transport assistances for poor TB patient (n=230)                                                       | 104 (45.2) |
| Providing subsistence allowance or psychological support for migrant patient (n=236)                                      | 117 (49.6) |
| Providing DOT for migrant TB patient at their convenient time (n=235)                                                     | 203 (86.4) |
| Providing injection treatment for MDR-TB patient (n=234)                                                                  | 96 (41.0)  |
| Providing supervision for newly released prison patient (n=236)                                                           | 139 (58.9) |
| Training cured TB patients to provide peer education (n=237)                                                              | 208 (87.8) |
| Establishing platform for TB patients communication (n=237)                                                               | 137 (57.8) |
| Referring TB patient with mental/psychological problems or alcohol/drug addiction to receive professional therapy (n=235) | 182 (77.4) |

Note: *Lower delivery rate* refers to a rate below 90%, *TB* refers to tuberculosis, *TTMS* refers to tuberculosis treatment management service, *DOT* refers to directly observed therapy, *MDR-TB* refers to multidrug-resistant tuberculosis

278 **Factors associated with TTMS with lower delivery rate**

279 Multivariate logistic regression analysis showed that HCWs with high working satisfaction  
 280 were less likely to have a lower delivery rate to establish patients peer supervision as needed  
 281 (OR=0.182, 95%CI: 0.059-0.562). Among both intensive and continuation phase DOT,  
 282 HCWs with junior title (OR=0.424, 95%CI: 0.215-0.835) and high working satisfaction  
 283 (OR=0.326, 95%CI: 0.140-0.766) were less likely to have lower delivery rate. Similarly,  
 284 HCWs with junior title (OR=0.458, 95%CI: 0.242-0.865) and high working satisfaction  
 285 (OR=0.395, 95%CI: 0.160-0.826) were more likely to deliver sputum sample collection  
 286 service (Table 4).

292

**Table 4** Logistic regression analysis of factors associated with lower delivery rate of TTMS by HCWs

| Variable                    | Patients' peer supervision establish (n=235)<br>OR (95%CI) | Intensive phase DOT (n=236)<br>OR (95%CI) | Continuation phase DOT (n=236)<br>OR (95%CI) | Regular medicine delivery (n=234)<br>OR (95%CI) | Sputum sample collection (n=236)<br>OR (95%CI) | Injection treatment for MDR-TB patient (n=234)<br>OR (95%CI) | Providing supervision for newly released prison patient (n=236)<br>OR (95%CI) |
|-----------------------------|------------------------------------------------------------|-------------------------------------------|----------------------------------------------|-------------------------------------------------|------------------------------------------------|--------------------------------------------------------------|-------------------------------------------------------------------------------|
| <b>Gender</b>               |                                                            |                                           |                                              |                                                 |                                                |                                                              |                                                                               |
| Female                      | Reference                                                  |                                           |                                              | Reference                                       |                                                |                                                              |                                                                               |
| Male                        | 0.577 (0.258-1.270)                                        |                                           |                                              | 0.605(0.320-1.147)                              |                                                |                                                              |                                                                               |
| <b>Age</b>                  |                                                            |                                           |                                              |                                                 |                                                |                                                              |                                                                               |
| >50                         |                                                            | Reference                                 |                                              |                                                 |                                                |                                                              |                                                                               |
| 40-50                       |                                                            | 2.053(0.985-4.279)                        |                                              |                                                 |                                                |                                                              |                                                                               |
| 30-39                       |                                                            | 2.230(0.947-5.248)                        |                                              |                                                 |                                                |                                                              |                                                                               |
| <30                         |                                                            | Default                                   |                                              |                                                 |                                                |                                                              |                                                                               |
| <b>Professional Title</b>   |                                                            |                                           |                                              |                                                 |                                                |                                                              |                                                                               |
| Non                         |                                                            | Reference                                 | Reference                                    |                                                 | Reference                                      | Reference                                                    | Reference                                                                     |
| Junior                      |                                                            | 0.424(0.215-0.835)*                       | 0.419(0.228-0.771) *                         |                                                 | 0.458(0.242-0.865) *                           | 0.307(0.159-0.594)                                           | 0.681(0.364-1.273)                                                            |
| Intermediate                |                                                            | 0.625(0.233-1.787)                        | 0.860(0.355-2.804)                           |                                                 | 1.137(0.432-2.995)                             | 0.686(0.258-1.827)                                           | 2.107(0.829-5.353)                                                            |
| Deputy senior               |                                                            | 0.276(0.021-3.605)                        | 0.415(0.024-5.020)                           |                                                 | 1.644(0.131-20.581)                            | 0.809(0.054-12.031)                                          | 2.534(0.179-35.887)                                                           |
| <b>Training frequency</b>   |                                                            |                                           |                                              |                                                 |                                                |                                                              |                                                                               |
| 0/6 months                  |                                                            |                                           |                                              |                                                 | Reference                                      | Reference                                                    | Reference                                                                     |
| 1/6 months                  |                                                            |                                           |                                              |                                                 | 2.474(0.566-10.822)                            | 3.533(0.767-16.277)                                          | 4.752(0.858-26.335)                                                           |
| 2/6 months                  |                                                            |                                           |                                              |                                                 | 2.890(0.729-11.465)                            | 2.217(0.534-9.199)                                           | 2.568(0.500-13.182)                                                           |
| 3/6 months                  |                                                            |                                           |                                              |                                                 | 0.776(0.165-3.660)                             | 0.607(0.126-2.923)                                           | 0.990(0.162-6.048)                                                            |
| >3/6 months                 |                                                            |                                           |                                              |                                                 | 2.307(0.432-12.327)                            | 2.841(0.503-16.-54)                                          | 3.346(0.508-22.044)                                                           |
| <b>Working satisfaction</b> |                                                            |                                           |                                              |                                                 |                                                |                                                              |                                                                               |
| Low satisfaction            | Reference                                                  | Reference                                 | Reference                                    | Reference                                       | Reference                                      |                                                              |                                                                               |
| Middle satisfaction         | 0.354(0.168-0.745) *                                       | 0.449(0.219-0.903) *                      | 0.584 (0.312-1.095)                          | 0.582(0.309-1.094)                              | 0.661(0.304-1.533)                             |                                                              |                                                                               |
| High satisfaction           | 0.182(0.059-0.562) *                                       | 0.326(0.140-0.766) *                      | 0.347(0.163-0.741) *                         | 0.375(0.165-0.853)                              | 0.395(0.160-0.826) *                           |                                                              |                                                                               |

Note: *Lower delivery rate* refers to rate below 90%, *TTMS* refers to tuberculosis treatment management service, *DOT* refers to directly observed therapy, *MDR-TB* refers to multidrug-resistance tuberculosis, *CI* refers to confidence interval, \* refers to  $p < 0.05$ .

293 **Qualitative results about barriers to TTMS delivery**

294 The in-depth interviews disclosed numerous barriers to TTMS delivery from the four core

295 PRISM domains as follows (Table 5):

296 **Table 5** Barriers of TTMS delivery by HCWs in PHC sectors

| Core PRISM domains         | Results                                                                                                                                                                                                                                                                                                                                                                                                                                                                                                                                                                                                                                                                                                                                                                                                                                                                                                                      | Quotations                                                                                                                                                                                                                                                                                                                                                                                                                                                                                                                                                                                                                                                                                                                                                                                                                                                                                                                                                                                                                                                                  |
|----------------------------|------------------------------------------------------------------------------------------------------------------------------------------------------------------------------------------------------------------------------------------------------------------------------------------------------------------------------------------------------------------------------------------------------------------------------------------------------------------------------------------------------------------------------------------------------------------------------------------------------------------------------------------------------------------------------------------------------------------------------------------------------------------------------------------------------------------------------------------------------------------------------------------------------------------------------|-----------------------------------------------------------------------------------------------------------------------------------------------------------------------------------------------------------------------------------------------------------------------------------------------------------------------------------------------------------------------------------------------------------------------------------------------------------------------------------------------------------------------------------------------------------------------------------------------------------------------------------------------------------------------------------------------------------------------------------------------------------------------------------------------------------------------------------------------------------------------------------------------------------------------------------------------------------------------------------------------------------------------------------------------------------------------------|
| Intervention: TTMS program | <p><b>Patient-centered manner:</b><br/>Patient expressed antipathy to DOT. Some HCWs also stated that TB patients don't like the current approach to deliver TTMS, maybe new e-health approach should be taken into account.</p>                                                                                                                                                                                                                                                                                                                                                                                                                                                                                                                                                                                                                                                                                             | <p><i>Got telephone calls during the first 2 months, very few afterwards...I didn't like (DOT). (Mid-20s patient)</i><br/><i>There is one MDR-TB patient...say it is annoying to call him every day (by us to deliver TTMS program). (HCW)</i><br/><i>I think that we can remind patients to take medicine via digital technologies. Although, the elders may not use phone adroitly, we find that they missed drug taking less frequently than the young patients. So we can remind young patients through APP in mobile phone. (HCW)</i></p>                                                                                                                                                                                                                                                                                                                                                                                                                                                                                                                              |
| Recipients                 | <p><b>Resources and incentive in PHC sectors:</b><br/>Majority HCWs and leaders stated that PHC sectors, particularly THCs faced insufficient human resource HCWs to deliver TTMS program. HCWs often undertook &gt;2 BPHS programs which led to hardship to deliver standard TTMS to TB patients. And inadequate professional capability, particularly village doctors, led to patients' distrusts and therefore hindered TTMS delivery. Many HCWs claimed that PHC sectors lacked of transportation tools to facilitate home-visits especially for remote rural patients<br/>Moreover, majority HCWs and leaders reported that lack of incentive for HCWs in TTMS program, and almost all HCWs unsatisfied with low subsidy, allowance, and salary regarding their heavy workload and infection risk. Out-of-pocket expenditure for transportations and telephone charges for TTMS delivery was also reported by HCWs.</p> | <p><i>Too many works, it is hard to communicated well with patients...I have 2-3 days a week to give phone calls to TB patients, too tired...we often take two works by one person, the workloads is huge. (HCW)</i><br/><i>Insufficient and unstable HCWs ...one HCW leave, then we need to train a new one...(CDC leader)</i><br/><i>HCWs, especially at TCHs, low quality, patients don't trust them. (CDC leader)</i><br/><i>Lacking of transportation tools for home-visit, some (patients) live in rural area, far away...need to take a long distance to visit one patient. (HCW)</i><br/><i>We face high risks of infection. There is no subsidies for us to provide manage. Funding for TTMS delivery is not separated from subsidies for the whole BPHS program. Actually those subsidies from BPHS is not even enough for my telephone and transportation costs. (HCW)</i><br/><i>Without subsidies, the HCWs motivation and working satisfaction is low...they just to complete tasks, and will not really care about the quality of TTMS. (CDC leader)</i></p> |



|                      |                                                                                                                                                                                                                                                                                                                                                                                                       |                                                                                                                                                                                                                                                                                                                                                                                                                                                                                                                                                                                          |
|----------------------|-------------------------------------------------------------------------------------------------------------------------------------------------------------------------------------------------------------------------------------------------------------------------------------------------------------------------------------------------------------------------------------------------------|------------------------------------------------------------------------------------------------------------------------------------------------------------------------------------------------------------------------------------------------------------------------------------------------------------------------------------------------------------------------------------------------------------------------------------------------------------------------------------------------------------------------------------------------------------------------------------------|
|                      | <p><b>Training support to HCWs in PHC sectors:</b><br/>Some HCWs stated that TB trainings lack of communication and professional knowledge for TTMS delivery. Both HCWs and leaders mentioned lack of TB-specific training for HCWs.</p>                                                                                                                                                              | <p><i>2-3 TB trainings each year, from CDC...combined with other (BPHS) trainings...and I think this training is not effective.(HCW)</i></p>                                                                                                                                                                                                                                                                                                                                                                                                                                             |
|                      | <p><b>Patient's socio-economy:</b><br/>Most HCWs and leaders consistently agreed that most TB patients were old age and living with low socioeconomic status, have high risk to reject TTMS. Some HCWs also stated the hardship to deliver TTMS among migrant patients since hard to reach them.</p>                                                                                                  | <p><i>During treatment in later period, I didn't (take sputum examination), no money, no money for transportation. (Late-50s patient)</i><br/><i>Because TB itself is a "disease of the poor", most TB patients have financial difficulties with bad lifestyles and poor literacy. (HC leader)</i><br/><i>Migrant patients are hard to reach...some have no stable work and often change their phone numbers...don't like TTMS. (HCW)</i><br/><i>I told him/her the dangerousness and seriousness of MDR-TB, he/she still didn't keep treatment, only told me: 'no money'. (HCW)</i></p> |
|                      | <p><b>Patient's health literacy:</b><br/>Vast majorities of HCWs stated that some patients and their families refused to receive TTMS to manage their nonadherence behaviors due to poor health literacy and weak TB-related awareness.</p>                                                                                                                                                           | <p><i>Some (patients) don't prioritize their health, and dislike our TTMS...they are aged and less educated...Some have very poor adherence to TB treatment. (HCW)</i></p>                                                                                                                                                                                                                                                                                                                                                                                                               |
| External environment | <p><b>Health insurance:</b><br/>Most HCWs and leaders stated that the health insurance cannot cover all medicines and tests related to side-effect which added financial burden among poor TB patients and led to hardship for TTMS delivery.</p>                                                                                                                                                     | <p><i>The reimbursement from health insurance for TB is very strict, anti-TB drugs are free, and other liver protection medicines and tests are not.(HC leader)</i></p>                                                                                                                                                                                                                                                                                                                                                                                                                  |
|                      | <p><b>Cross-sectional coordination:</b><br/>Majority HCWs and leaders reported the difficulties to conduct cross-sectional coordination for TTMS delivery, especially coordination from TB designated hospitals. One leaders also stated a poor cross-sectional coordination between PHC sectors with the departments of education, public security, civil affair, and finance for TTMS delivery.</p> | <p><i>It is hard to connect with TB designated hospitals' doctors, they are very busy. One patients stopped treatment and said it is doctors' advice...but I cannot confirm. (HCW)</i><br/><i>The department of finance, education, civil affairs, public security, and others, ... they are not highly motivated (to give us support in TTMS program). (CDC leader)</i></p>                                                                                                                                                                                                             |
|                      | <p><b>Social stigma:</b><br/>TB-related social stigma was mentioned by many HCWs. Urban patients with more concerns of privacy issue were more likely to refuse home-visit from HCWs.</p>                                                                                                                                                                                                             | <p><i>There is one patient, it's impossible to go to his/her home... due to privacy, he/she doesn't like people around know they have TB. (HCW)</i><br/><i>Some TB patients don't like us to go to their home for home-visit... (They are)</i></p>                                                                                                                                                                                                                                                                                                                                       |

|                                                            |                                                                                                                                                                                                                                                                                     |                                                                                                                                                                                                                                                                                                                                                                                                                                                                    |
|------------------------------------------------------------|-------------------------------------------------------------------------------------------------------------------------------------------------------------------------------------------------------------------------------------------------------------------------------------|--------------------------------------------------------------------------------------------------------------------------------------------------------------------------------------------------------------------------------------------------------------------------------------------------------------------------------------------------------------------------------------------------------------------------------------------------------------------|
|                                                            |                                                                                                                                                                                                                                                                                     | <i>worried about how people around would think of them. (HCW)</i>                                                                                                                                                                                                                                                                                                                                                                                                  |
| Implementati<br>on and<br>Sustainability<br>infrastructure | <b>Performance assessment:</b><br>All HCWs and some of the leaders stated that the performance assessment for TTMS may exist irrationality considering heavy workload. And leaders pointed out that this could lead to substandard TTMS and also hinder HCW's working enthusiastic. | <i>(Performance) assessment is unreasonable, more works you do, more mistakes you make, and this is unfair. There is no rewards when you perform well...while, any negative feedbacks (such as patients' dissatisfactions with treatment costs) would affect our performance assessment. (HCW) The indexes are quiet high (considering HCW's workload). Sometimes, the purpose becomes to complete indexes but not to really care about patients. (CDC leader)</i> |

Note: *TB* refers to tuberculosis, *MDR-TB* refers to multidrug-resistant tuberculosis, *TTMS* refers to tuberculosis treatment management services, *DOT* refers to directly observed therapy, *HCWs* refers to health care workers, *CDC* refers to Center of Disease Control, *HC* refers to Health Commission, *BPHS* refers to basic public healthcare services, *THCs* refers to township health centers.

### 297 1) *Interventions*

298 Current TTMS program was mainly delivered via telephone calls and lacked of sufficient  
299 patient-centered manner which led to patient's antipathy to DOT. HCW suggested that  
300 e-health approach, including APP would be good choice to deliver TTMS.

### 301 2) *Recipients:*

302 Most PHC sectors faced insufficient health human resource to deliver TTMS program. Every  
303 HCW often undertook more than 2 BPHS programs. HCWs with this heavy work load of  
304 BPHS had difficulty to deliver standard TTMS delivery. On the other hand, PHC sectors  
305 lacked of transportation tools to facilitate home-visits especially for remote rural TB patients.  
306 HCWs in PHC sectors also faced inadequate professional capability, especially village  
307 doctors, which led to patients' distrusts and therefore hindered TTMS delivery by those  
308 HCWs. On the other hand, PHC sectors lack of sufficient incentive for HCWs in TTMS  
309 program, and almost all HCWs unsatisfied with low salary, and subsidy regarding their heavy



1  
2  
3  
4  
5 310 workload and infection risk of TB. In addition, out-of-pocket expenditure for transportation  
6  
7  
8 311 and telephone charge for TTMS delivery could further influence HCW's working motivation,  
9  
10 312 performance, and attrition. Moreover, inadequate qualified training (the content lack of  
11  
12  
13 313 communicational and professional knowledge for TTMS delivery, and the training approach  
14  
15  
16 314 of TB trainings mixed with other BPHS programs and lacking of high quality TB-specific  
17  
18 315 training for HCWs ) supports for TB HCWs were also reported by interviewers. So current  
19  
20  
21 316 training could not provide much support in HCWs' capabilities and performance.

22  
23 317 In terms of patient characteristics, the majority of interviewers claimed that TB is a disease of  
24  
25  
26 318 the poor and most TB patients were disadvantaged group (aging, low education, migrant and  
27  
28  
29 319 financial difficulty), who had poor TB-related health literacy and had high risk to reject  
30  
31 320 TTMS. HCWs also mentioned the hardship to deliver TTMS among migrant patients due to  
32  
33  
34 321 hard to reach them.

### 322 **3) External environment:**

323 On the one hand, inadequate health insurance coverage for medicines and tests related to  
324  
325 side-effects accentuated financial burden among poor TB patients and reduced willingness to  
326  
327 receive TTMS. On the other hand, difficulties in cross-sectional coordination to assist TTMS  
328  
329 delivery were reported, especially supports from TB designated hospitals and also other  
330  
331 departments like departments of public security and education. Furthermore, TB-related  
332  
333 social stigma was reported as one of the main barriers to conduct home-visits among urban  
334  
335 patients who care much privacy and were more likely to refuse to accept home-visits from  
336  
337  
338  
339  
340  
341  
342  
343  
344  
345  
346  
347  
348  
349  
350  
351  
352  
353  
354  
355  
356  
357  
358  
359  
360  
361  
362  
363  
364  
365  
366  
367  
368  
369  
370  
371  
372  
373  
374  
375  
376  
377  
378  
379  
380  
381  
382  
383  
384  
385  
386  
387  
388  
389  
390  
391  
392  
393  
394  
395  
396  
397  
398  
399  
400  
401  
402  
403  
404  
405  
406  
407  
408  
409  
410  
411  
412  
413  
414  
415  
416  
417  
418  
419  
420  
421  
422  
423  
424  
425  
426  
427  
428  
429  
430  
431  
432  
433  
434  
435  
436  
437  
438  
439  
440  
441  
442  
443  
444  
445  
446  
447  
448  
449  
450  
451  
452  
453  
454  
455  
456  
457  
458  
459  
460  
461  
462  
463  
464  
465  
466  
467  
468  
469  
470  
471  
472  
473  
474  
475  
476  
477  
478  
479  
480  
481  
482  
483  
484  
485  
486  
487  
488  
489  
490  
491  
492  
493  
494  
495  
496  
497  
498  
499  
500  
501  
502  
503  
504  
505  
506  
507  
508  
509  
510  
511  
512  
513  
514  
515  
516  
517  
518  
519  
520  
521  
522  
523  
524  
525  
526  
527  
528  
529  
530  
531  
532  
533  
534  
535  
536  
537  
538  
539  
540  
541  
542  
543  
544  
545  
546  
547  
548  
549  
550  
551  
552  
553  
554  
555  
556  
557  
558  
559  
560  
561  
562  
563  
564  
565  
566  
567  
568  
569  
570  
571  
572  
573  
574  
575  
576  
577  
578  
579  
580  
581  
582  
583  
584  
585  
586  
587  
588  
589  
590  
591  
592  
593  
594  
595  
596  
597  
598  
599  
600  
601  
602  
603  
604  
605  
606  
607  
608  
609  
610  
611  
612  
613  
614  
615  
616  
617  
618  
619  
620  
621  
622  
623  
624  
625  
626  
627  
628  
629  
630  
631  
632  
633  
634  
635  
636  
637  
638  
639  
640  
641  
642  
643  
644  
645  
646  
647  
648  
649  
650  
651  
652  
653  
654  
655  
656  
657  
658  
659  
660  
661  
662  
663  
664  
665  
666  
667  
668  
669  
670  
671  
672  
673  
674  
675  
676  
677  
678  
679  
680  
681  
682  
683  
684  
685  
686  
687  
688  
689  
690  
691  
692  
693  
694  
695  
696  
697  
698  
699  
700  
701  
702  
703  
704  
705  
706  
707  
708  
709  
710  
711  
712  
713  
714  
715  
716  
717  
718  
719  
720  
721  
722  
723  
724  
725  
726  
727  
728  
729  
730  
731  
732  
733  
734  
735  
736  
737  
738  
739  
740  
741  
742  
743  
744  
745  
746  
747  
748  
749  
750  
751  
752  
753  
754  
755  
756  
757  
758  
759  
760  
761  
762  
763  
764  
765  
766  
767  
768  
769  
770  
771  
772  
773  
774  
775  
776  
777  
778  
779  
780  
781  
782  
783  
784  
785  
786  
787  
788  
789  
790  
791  
792  
793  
794  
795  
796  
797  
798  
799  
800  
801  
802  
803  
804  
805  
806  
807  
808  
809  
810  
811  
812  
813  
814  
815  
816  
817  
818  
819  
820  
821  
822  
823  
824  
825  
826  
827  
828  
829  
830  
831  
832  
833  
834  
835  
836  
837  
838  
839  
840  
841  
842  
843  
844  
845  
846  
847  
848  
849  
850  
851  
852  
853  
854  
855  
856  
857  
858  
859  
860  
861  
862  
863  
864  
865  
866  
867  
868  
869  
870  
871  
872  
873  
874  
875  
876  
877  
878  
879  
880  
881  
882  
883  
884  
885  
886  
887  
888  
889  
890  
891  
892  
893  
894  
895  
896  
897  
898  
899  
900  
901  
902  
903  
904  
905  
906  
907  
908  
909  
910  
911  
912  
913  
914  
915  
916  
917  
918  
919  
920  
921  
922  
923  
924  
925  
926  
927  
928  
929  
930  
931  
932  
933  
934  
935  
936  
937  
938  
939  
940  
941  
942  
943  
944  
945  
946  
947  
948  
949  
950  
951  
952  
953  
954  
955  
956  
957  
958  
959  
960  
961  
962  
963  
964  
965  
966  
967  
968  
969  
970  
971  
972  
973  
974  
975  
976  
977  
978  
979  
980  
981  
982  
983  
984  
985  
986  
987  
988  
989  
990  
991  
992  
993  
994  
995  
996  
997  
998  
999  
1000

1  
2  
3  
4  
5 331 **4) Implementation and sustainability infrastructure:**  
6  
7

8 332 The performance assessment for TB HCWs might exist irrationality considering their heavy  
9  
10 333 workload. One leader pointed out that to the purpose of TTMS delivery could become to  
11  
12 334 complete the targeted indicators, and therefore, lead to substandard TTMS to patients.  
13  
14  
15 335 Moreover, inappropriate performance assessment also hinder working motivation and  
16  
17  
18 336 increased working attrition among HCWs to deliver TTMS.  
19

20  
21 337 **Discussion**  
22

23 338 In China, HCWs in PHC sectors are considered as an important part of the TB integrated  
24  
25 339 model and taking responsibility for TTMS delivery. This study assessed the delivery of  
26  
27  
28 340 TTMS program by HCWs in PHC sectors in West China. Though we found that the TTMS  
29  
30  
31 341 delivery rates in intensive phase and continuation phase were higher than previous study in  
32  
33  
34 342 West China [14], the standard TTMS (at least 24 times TTMS during their treatment course)  
35  
36  
37 343 delivery rate is far below the required rate of >90% according to the National TB Control  
38  
39  
40 344 Plan [5]. Besides, our study showed that TB patients received DOT from HCW in CHCs (in  
41  
42  
43 345 urban regions) was higher than that from HCW in THCs (in rural regions). This difference  
44  
45  
46 346 might be explained by our qualitative results as interviewed HCWs reported the challenges to  
47  
48  
49 347 delivery TTMS to remote rural patients due to patients' poor health literacy which is also  
50  
51  
52 348 reported in other studies [16, 25], and our study also pointed the far away distance with  
53  
54  
55 349 insufficient transportation tools for HCWs blocked TTMS delivery. In addition, our study  
56  
57  
58 350 revealed that less than half of HCWs provided services of collecting patients' sputum  
59  
60 351 samples during follow-up supervision, which is much lower than the result reports in the

1  
2  
3  
4  
5 352 study in Guizhou (96.56%) [25]. Furthermore, we found a low level of working satisfaction  
6  
7  
8 353 (22.4%) among TB HCWs, while, it is higher than previous study (12.2%) [26]. Our study  
9  
10 354 results indicated that HCWs with low working satisfaction were more likely to have a low  
11  
12  
13 355 delivery rate of first-time home visit, DOT, and sputum sample collection services. Efforts  
14  
15  
16 356 should be made to maintain and promote HCWs' working satisfaction to enhance TTMS  
17  
18 357 delivery.

20  
21 358 Our study disclosed that the current TTMS delivery was confronted with various barriers,  
22  
23  
24 359 despite that TB HCWs in PHC sectors carried out TTMS program had made many  
25  
26 360 achievements in West China. In the organizational level, we found that the TTMS programs  
27  
28  
29 361 itself existed several barriers for HCWs to delivery services. On the one hand, the national  
30  
31 362 TB action plans and nationwide TB survey in China [2, 8, 27] mentioned the cross-sectional  
32  
33  
34 363 coordination for TTMS delivery, however, we found that HCWs in PHC sectors still lack of  
35  
36 364 well coordination with other departments, such as coordination from department of education  
37  
38  
39 365 to support students treatment management, help from department of public security to trace  
40  
41  
42 366 migrant patients' information. Particularly, HCWs from some PHC sectors faced barriers to  
43  
44 367 access timely connections with TB HCWs from TB designated hospital in addressing TB  
45  
46  
47 368 patients' side effects and treatment adherence. It is difficult to realize the participation of the  
48  
49  
50 369 whole society in TB control in China so far [28]. As the call by the Action Plan to Stop TB  
51  
52 370 (2019 to 2022) in China [2], it is an emergent need to build a multi-sectorial collaboration  
53  
54  
55 371 mechanism led by the National Health Commission (NHC) in order to coordinate  
56  
57 372 cross-sectional efforts to support TB prevention and control program [29].  
58  
59  
60

1  
2  
3  
4  
5 373 The second barrier emerged at health organizational level is the approaches to delivery  
6  
7  
8 374 TTMS. We found TTMS were mainly delivered by telephone call, which consistent with  
9  
10  
11 375 previous studies in West China [14, 28], and the insufficient patient-centered manners could  
12  
13 376 resulted in patients' rejects to DOT and TTMS by HCWs. Although researches showed that  
14  
15  
16 377 home-visits and DOT did led to positive treatment outcome [29, 30], our study pointed out  
17  
18 378 the need to provide TTMS with e-health approach, which was consistent with previous  
19  
20  
21 379 studies, and previous studies demonstrated the effectiveness of e-health technology for  
22  
23  
24 380 promoting patients' treatment adherence [31-36]. It is deserved to explore internet-based case  
25  
26  
27 381 management model, such as digital supported self-management, and with the help of HCWs  
28  
29 382 in PHC sectors to deliver TTMS to TB patients who live in remote mountain area or against  
30  
31 383 face-to-face DOT.

32  
33  
34 384 The third barrier in organizational level is the health human resource for TTMS in PHC  
35  
36  
37 385 sectors. Other studies reported that PHC sectors especial in rural areas had a limited number  
38  
39  
40 386 of HCWs to conduct BPHS programs which led to heavy workload and "shortage of hands"  
41  
42 387 since HCWs often carried out multiple assigned services [37-39]. We consistently found that  
43  
44  
45 388 PHC sectors, particularly in THCs, faced human resource barriers in terms of insufficient  
46  
47 389 number and inadequate professional capability to deliver TTMS program. On the one side,  
48  
49  
50 390 our study showed that heavy workload with multiple BPHS programs could led to hardship to  
51  
52 391 deliver standard TTMS to TB patients. On the other side, we found that inadequate  
53  
54  
55 392 professional capability, especially village doctors, could led to patients' distrusts and hence  
56  
57 393 impeded TTMS delivery. Simultaneously, our study disclosed that PHC sectors lack of  
58  
59  
60

1  
2  
3  
4  
5 394 adequate TB training for HCWs, particularly training related to communicational and  
6  
7  
8 395 professional knowledge for TTMS delivery resulted in substandard TTMS. Other studies  
9  
10  
11 396 proved the on-the-job training is important to improve professional skills among HCWs [28,  
12  
13 397 38, 40, 41], especially trainings emphasized both knowledge and practice [42]. Furthermore,  
14  
15  
16 398 we found that the performance assessment for HCWs in TTMS program may exist  
17  
18 399 irrationality regarding their heavy workload which led to hardship to deliver standard TTMS  
19  
20  
21 400 and hindered their working enthusiastic.

22  
23 401 In addition, our results showed that PHC sectors lack of sufficient funding for TTMS  
24  
25  
26 402 program, and most HCWs unsatisfied with low salary, allowance or subsidy which was  
27  
28  
29 403 consistent with other study [25]. Many research also indicated that the diverse issues of  
30  
31 404 financial incentives combined with heavy workload could influence HCW's motivation and  
32  
33  
34 405 performance [38, 43-46]. The appropriate use of incentives for HCWs is a means of  
35  
36  
37 406 promoting health outcomes with a direct impact on the effectiveness and sustainability of a  
38  
39  
40 407 health program, and also able to improve services delivery through enhancing motivation and  
41  
42 408 reducing attrition [42]. Notably, we found that HCWs faced out-of-pocket expenditure for  
43  
44  
45 409 transportations and telephone charges for TTMS delivery which could further impact their  
46  
47 410 work enthusiastic.

48  
49  
50 411 Our results also identified barriers in patient level to TTMS delivery included their  
51  
52 412 susceptible socioeconomic characteristics (aging, low education, migrant, and poor financial  
53  
54  
55 413 status) and lower literacy related to TB control. Previous nationwide TB epidemiology  
56  
57 414 survey in China revealed that near half (48.8%) of the TB patients were aged  $\geq 60$ , less  
58  
59  
60

1  
2  
3  
4  
5 415 educated, and over 80% of TB patients had household incomes below local levels [16]. Our  
6  
7  
8 416 results indicated that poor socioeconomic characteristics and low TB-related health literacy  
9  
10 417 together highly impeded TTMS delivery. As patients with low socioeconomic features were  
11  
12  
13 418 often found with lower education background, poor health literacy, and more likely to be  
14  
15  
16 419 have nonadherence, hence, they more likely to refuse to HCWs' supervision, which is  
17  
18  
19 420 consistent with other studies [16, 47]. In addition, we found that TTMS delivery among  
20  
21 421 migrant patients was challenging for HCWs due to hard to reach. Other studies also reported  
22  
23  
24 422 that migrant patients with frequently movement and low socioeconomic status had relatively  
25  
26 423 poorer TB-related awareness [48-50] which could future hindered TB case management.  
27  
28  
29 424 Previous studies revealed that West China had a higher proportion of rural mountain areas as  
30  
31 425 well as domestic migrants compared with other regions in China, and TB-related awareness  
32  
33  
34 426 among rural, less educated, and migrants was particularly serious [16, 48, 50-52].  
35  
36  
37 427 Our study also discovered that the health insurance cannot cover all medicines and tests  
38  
39 428 related to side-effects which accentuated financial burden among poor TB patients and led to  
40  
41  
42 429 hardship for TTMS delivery. In order to relief barriers from TB patients, on the one hand,  
43  
44  
45 430 addressing financial burden due to TB treatment among poor patients is crucial.  
46  
47 431 Notwithstanding, previous national TB epidemiology survey in China reported that over 90%  
48  
49  
50 432 of TB patients had medical insurance combined with the policy of free TB diagnosis and  
51  
52 433 treatment, the proportion of out-of-pocket among patients was still around 75.0%-84.2% [16].  
53  
54  
55 434 Studies and reports mentioned the necessary to increase reimbursement ratio and amount for  
56  
57 435 TB treatment, to expand the scope of current free TB treatment policy, and to strengthen care  
58  
59  
60

1  
2  
3  
4  
5 436 and assistance for TB patients [2, 5, 31]. Particularly need to target DR-TB and impoverished  
6  
7  
8 437 patients with transportation, accommodation and nutrition allowance during TTMS delivery  
9  
10  
11 438 to promote TB control outcomes.

12  
13 439 On the other hand, promoting TB-related health literacy among patients and enhancing  
14  
15  
16 440 TB-related awareness among the public are urgently necessary. As our study revealed that  
17  
18 441 not only poor TB health literacy is a barrier from patients, TB-related social stigma also  
19  
20  
21 442 impeded TTMS delivery especially in urban areas. Previous studies suggested to provide  
22  
23  
24 443 easily understandable TB health education to particular target population (the aged, less  
25  
26 444 educated, close contacts, etc.) with certain modes of health education [16, 51]. Other study  
27  
28  
29 445 indicated that a combination of mass media approaches and interpersonal communications  
30  
31  
32 446 between patients and HCWs could lead to more effective TB control [52]. Similarly, Chinese  
33  
34 447 Action Plan to Stop TB called for various publicity activities to raise awareness of TB which  
35  
36 448 includes traditional media such as television broadcasting and newspaper, and also the use of  
37  
38  
39 449 new media such as WeChat to promote dissemination of scientific TB knowledge and  
40  
41  
42 450 eliminate social discrimination [2].

#### 44 451 ***Strengthens and limitations***

46  
47 452 Our study used a mixed research method combining quantitative research (questionnaire  
48  
49  
50 453 survey) with qualitative research (semi-structured, open-ended in-depth interviews) to assess  
51  
52 454 TTMS program delivery by HCWs in PHC sectors. Perspectives from organizations and  
53  
54  
55 455 patients were both included by using the PRISM model to evaluate specific barriers to TTMS  
56  
57  
58 456 delivery. Three levels of the local health organization were all involved in our study, which  
59  
60

1  
2  
3  
4  
5 457 contained the HCWs as the frontline staffs, the CDC leaders as the managers, and the Health  
6  
7  
8 458 Commission leaders as the policy makers. However, there are a number of limitations in the  
9  
10  
11 459 current study. First, the sample size of both questionnaire survey and in-depth interviews  
12  
13 460 could be further expanded to enhance the representativeness of study. Second, as we only  
14  
15 461 explore the status of and barriers to TTMS delivery by HCWs in PHC sectors,  
16  
17 462 well-evidenced implementation strategies that able to solve current problems successfully  
18  
19 463 were not able to be provided in this study. Further studies are required to provide more  
20  
21 464 evidence for producing more comprehensive and effective TB control strategies.  
22  
23  
24  
25

## 26 465 **Conclusion**

27  
28 466 All the engagements of HCWs in TTMS program suggests that the government realized the  
29  
30  
31 467 importance of HCWs in PHC sectors in promoting TB patients treatment adherence and  
32  
33 468 outcomes and underscored their integration into the TB control model. We identified barriers  
34  
35 469 operating in organizational level (cross-sectional coordination, patient-centered approach,  
36  
37 470 resources and incentives, training support, reimbursement issue, and performance  
38  
39 471 assessment) and patient level (socioeconomic characteristics, health literacy and social  
40  
41 472 stigma) to TTMS delivery by HCWs in PHC sectors. There is an urgent need to identify  
42  
43 473 comprehensive measures to effectively overcome barriers to TTMS delivery and further  
44  
45 474 promote TB control in West China.  
46  
47  
48  
49

50  
51 475 **Acknowledgements** We would like to thank the participants who responded our  
52  
53 476 questionnaires. We also thank all leaders and healthcare workers in the PHCs in study places  
54  
55 477 who supported this study by facilitating implementation of the field questionnaire survey and  
56  
57 478 participated in our interviews.  
58  
59  
60



1  
2  
3  
4  
5 479 **Contributions** JZ, JP and YL have designed this survey, JZ, JP, GW, WX, TZ, SL and QW  
6  
7 480 have collected data, JZ, JP, RZ, YC and JL have managed and analyzed data, YL and DH  
8  
9 481 have controlled the quality of data collection and analysis, JZ has drafted the manuscript. YL  
10  
11 482 has edited the manuscript. All authors have interpreted the results, revised the report and  
12  
13 483 completed the final version. The author(s) read and approved the final manuscript.

14  
15 484 **Funding** The study was funded by the National Natural Science Foundation of China  
16  
17 485 (No.81773489), the Chongqing outstanding youth project (No.cstc2020jcyj-jq0035), Social  
18  
19 486 Science and Technology Innovation Subject in Chongqing (No.cstc2015shmszx120070).

20  
21 487 **Disclaimer** The funders had no role in study design, data collection and analysis,  
22  
23 488 interpretation of the data, writing the paper and the decision to submit the paper for  
24  
25 489 publication.

26  
27 490 **Competing interests** Not declared

28  
29 491 **Patient consent** Obtained.

30  
31 492 **Ethics approval** Ethics approval was obtained from the Institutional Review Board of Army  
32  
33 493 Medical University (Third Military Medical University), Chongqing, China  
34  
35 494 (No.AF/SC-08/1.0) before starting the study. This study was conducted in accordance with  
36  
37 495 the Declaration of Helsinki. A full explanation of the purpose and procedure of the study was  
38  
39 496 provided to participants prior to obtain their written informed consent. All demographic data  
40  
41 497 and quotes used in this study were deidentified to maintain the anonymity of participants.

42  
43 498 **Provenance and peer review** Not commissioned; externally peer reviewed.

44  
45 499 **Data availability statement** Data are available upon reasonable request.

46  
47 500 **Supplemental material** This content has been supplied by the author(s). It has not been  
48  
49 501 vetted by BMJ Publishing Group Limited (BMJ) and may not have been peer-reviewed. Any  
50  
51 502 opinions or recommendations discussed are solely those of the author(s) and are not endorsed  
52  
53 503 by BMJ. BMJ disclaims all liability and responsibility arising from any reliance placed on the  
54  
55 504 content. Where the content includes any translated material, BMJ does not warrant the  
56  
57 505 accuracy and reliability of the translations (including but not limited to local regulations,  
58  
59 506 clinical guidelines, terminology, drug names and drug dosages), and is not responsible for  
60

any error and/or omissions arising from translation and adaptation or otherwise.

**Open access** This is an open access article distributed in accordance with the Creative Commons Attribution Non Commercial (CC BY-NC 4.0) license, which permits others to distribute, remix, adapt, build upon this work non-commercially, and license their derivative works on different terms, provided the original work is properly cited, appropriate credit is given, any changes made indicated, and the use is non-commercial. See: <http://creativecommons.org/licenses/by-nc/4.0/>.

#### References:

- [1]. World Health Organization. Global tuberculosis report 2020. Geneva: World Health Organization. 2020.
- [2]. National Health Commission. Stop TB Action Plan (2019-2022). 2019. <http://www.nhc.gov.cn/jkj/s3589/201906/b30ae2842c5e4c9ea2f9d5557ad4b95f.shtml>
- [3]. World Health Organization: Treatment of tuberculosis: Guidelines for national programmes (4<sup>th</sup> edition), 2010. [https://www.ncbi.nlm.nih.gov/books/NBK138748/pdf/Bookshelf\\_NBK138748.pdf](https://www.ncbi.nlm.nih.gov/books/NBK138748/pdf/Bookshelf_NBK138748.pdf).
- [4]. Ministry of Health of the People's Republic of China. National tuberculosis control programme (2011-2015). 2011. National Health Commission. Stop TB Action Plan (2019-2022). 2019. [http://www.gov.cn/gongbao/content/2011/content\\_2020914.htm](http://www.gov.cn/gongbao/content/2011/content_2020914.htm).
- [5]. General Office of the State Council of the People's Republic of China. The 13th five year plan for the prevention and control of tuberculosis. 2017. [http://www.gov.cn/zhengce/content/2017-02/16/content\\_5168491.htm](http://www.gov.cn/zhengce/content/2017-02/16/content_5168491.htm)
- [6]. National Health Commission of the People's Republic of China. National basic public health service standard (3rd edition). 2017. <http://www.nhc.gov.cn/jws/s3578/201703/d20c37e23e1f4c7db7b8e25f34473e1b.shtml>
- [7]. Yufei Chen. Discussion on the effect of the integrated tuberculosis prevention and control model in Dongxiang County. Foreign Medical science section of medgeograpy, 2014; 35 (3).
- [8]. Xiaojie Chen, Zhanchun Feng. Analysis of the implementation effect of the integrated tuberculosis prevention and control model in Wuhan. Medicine and society. 2014;27(2):62-4.
- [9]. Xiaodan Wu. The impact of community supervisors' supervision and management visits on the rate and curative effect of non-hospital pulmonary tuberculosis patients. World Latest Medicine Information. 2018;18(90):210.
- [10]. Zhang SN, Yuan ZA, Mei J, Shen M, Shen X. The effectiveness of the new TB control network in Shanghai. Chin J Antituberc. 2007;29(1):74-7.
- [11]. Wang XY. Evaluation on effectiveness of the new trinity TB control network in Wujin District

- 1  
2  
3  
4  
5 541 of Changzhou. *Jiangsu J Prev Med*. 2013;24(5):18–20.
- 6 542 [12].Jing GQ, Qian QW, Ding TD. The effects of tuberculosis prevention and control using the  
7 543 integrated mode in Bengbu. *Anhui J Prev Med*. 2012;18(6): 425–6.
- 8 544 [13].Xie MF, Lai SF, Lian ST. Analysis on the effect of integrated tuberculosis control mode,  
9 545 Wuping county. *Prev Med Trib*. 2018;24(1):76–8
- 10 546 [14].Pu J, Chen W, Jiang WX, Xing W, Liang SX, Wang G, et al. Is tuberculosis patients  
11 547 management improved in the integrated TB control model in West China? A survey in Guizhou  
12 548 Province, China. *Infect Dis Poverty*. 2019 Jul 2;8(1):55.
- 13 549 [15]. Li Y, Ehiri J, Oren E, Hu D, Luo X, Liu Y, et al. Are we doing enough to stem the tide of  
14 550 acquired MDR-TB in countries with high TB burden? Results of a mixed method study in  
15 551 Chongqing, China. *PLoS One*. 2014 Feb 5; 9 (2):e88330.
- 16 552 [16].Yu Wang. The fifth national tuberculosis epidemiological sampling survey. Beijing: Military  
17 553 Medical Science Press. 2011.10
- 18 554 [17].National Bureau of Statistics. China Statistical Year book: China Statistics Press. 2018.  
19 555 <http://www.stats.gov.cn/tjsj/ndsj/2018/indexch.htm>.
- 20 556 [18].Q Wang, T Li, X Du, N Yan, YL Zhao, H Zhang. Analysis in the incidence of national  
21 557 tuberculosis reports from 2015-2019. *Chinese Journal of Antituberculosis*. 2021;  
22 558 43(02):107-112.
- 23 559 [19].Xin J. Tuberculosis DOT counterparts to DOT understanding, manner and demand. Chinese  
24 560 Center for Diseases Control and Prevention. 2008.
- 25 561 [20].Feldstein, A.C, R.E. Glasgow. A practical, robust implementation and sustainability model  
26 562 (PRISM) for integrating research findings into practice. *Jt Comm J Qual Patient Saf*. 2008; 34(4):  
27 563 p. 228-43.
- 28 564 [21].Liles, E.G, et al. Implementation challenges and successes of a population-based colorectal  
29 565 cancer screening program: a qualitative study of stakeholder perspectives. *Implementation*  
30 566 *Science*. 2015; 10(1).
- 31 567 [22].Schneider, J.L, et al Stakeholder perspectives on implementing a universal Lynch syndrome  
32 568 screening program: a qualitative study of early barriers and facilitators. *Genetics in Medicine*.  
33 569 2016; 18(2): p. 152-161.
- 34 570 [23].Smith J, Firth J. Qualitative data analysis: the framework approach. *Nurse Researcher*. 2011;  
35 571 18(2): 52–62.
- 36 572 [24].Ward DJ, Furber C, Tierney S, Swallow V. Using Framework Analysis in nursing research: A  
37 573 worked example. *J Adv Nurs*. 2013; 69(11): 2423–31.
- 38 574 [25].YY He, JL Li, W Chen, L Luo, Y Shang, JH Xu. Analysis on the implementation of basic public  
39 575 health tuberculosis service items in Guizhou Province. *Studies of Trace Elements and Health*.  
40 576 2020; 37(02):54-57.
- 41 577 [26].Gaspar LMDS, Braga C, Albuquerque GDM, Silva MPN, Maruza M, Montarroyos UR, et al.
- 42  
43  
44  
45  
46  
47  
48  
49  
50  
51  
52  
53  
54  
55  
56  
57  
58  
59  
60

- 1  
2  
3  
4  
5 578 Knowledge, attitudes and practices of community health agents regarding pulmonary  
6 579 tuberculosis in a capital city in northeastern Brazil. *Cien Saude Colet.* 2019;  
7 580 26;24(10):3815-3824.
- 9 581 [27]. Hui Z, Xiaoqiu L, Caihong X, Dongmei H, Xue L, Tao L, et al. Guiding Tuberculosis Control  
10 582 Through the Healthy China Initiative 2019–2030. *China CDC Weekly.* 2020, 2(49): 948-950..
- 12 583 [28]. Liu GH, Deng J, Chen W. Investigation on the status of needs on community doctors for  
13 584 tuberculosis management in Guizhou Province. *China Health Industry.* 2019;16(21):11-13.
- 15 585 [29]. Xu L, Gai R, Wang X, Liu Z, Cheng J, Zhou C, Liu J, Zhang H, Li H, Tang W. Socio-economic  
16 586 factors affecting the success of tuberculosis treatment in six counties of Shandong Province  
17 587 China. *The International Journal of Tuberculosis and Lung Disease.* 2010;14(4):440–6.
- 20 588 [30]. Lertkanokkun S, Okanurak K, Kaewkungwal J, Meksawasdichai N. Healthcare providers’  
21 589 knowledge, attitudes & practices regarding tuberculosis care. *JitMM2012 PrOcEEDInGs.*  
22 590 2013;2:1–10.
- 24 591 [31]. Chongqing tuberculosis dispensary. Implementation plan of the Chongqing Stop Tuberculosis  
25 592 Action (2019-2022). 2020. <http://www.cqtb.org/html/zcfg/20/01/1121.html>
- 27 593 [32]. Zhang H, Liu JJ. The overview and prospect of tuberculosis control in China since the founding  
28 594 of the Peoples Republic of China. *Chin J Antituberc.* 2019; 41(9):913 – 6.
- 30 595 [33]. Liu X, Lewis JJ, Zhang H, Lu W, Zhang S, Zheng G, et al. Effectiveness of Electronic  
31 596 Reminders to Improve Medication Adherence in Tuberculosis Patients: A Cluster-Randomised  
32 597 Trial. *PLoS Med.* 2015 Sep 15; 12 (9):e1001876.
- 34 598 [34]. Alipanah N, Jarlsberg L, Miller C, Linh NN, Falzon D, Jaramillo E, et al. Adherence  
35 599 interventions and outcomes of tuberculosis treatment: A systematic review and meta-analysis of  
36 600 trials and observational studies. *PLoS Med.* 2018 Jul 3;15 (7):e1002595.
- 39 601 [35]. Nhavoto JA, Grönlund Å, Klein GO. Mobile health treatment support intervention for HIV and  
40 602 tuberculosis in Mozambique: Perspectives of patients and healthcare workers. *PLoS One.* 2017  
41 603 Apr 18;12(4):e0176051.
- 43 604 [36]. Wang N, Zhang H, Zhou Y, Jiang H, Dai B, Sun M, et al. Using electronic medication  
44 605 monitoring to guide differential management of tuberculosis patients at the community level in  
45 606 China. *BMC Infect Dis.* 2019 Oct 15;19(1):844.
- 48 607 [37]. Huang et al. *Global Health Research and Policy.* 2018. (3):18.  
49 608 <https://doi.org/10.1186/s41256-018-0072-0>
- 51 609 [38]. Tao T, Zhao Q, Jiang S, Ma L, Wan L, Ma Y, et al. Motivating health workers for the provision  
52 610 of directly observed treatment to TB patients in rural China: does cash incentive work? A  
53 611 qualitative study. *Int J Health Plann Manag.* 2013;28(4):e310–24.
- 55 612 [39]. Liang S, Deng H, Liu S, Wang G, Li L, Wang M, et al. Competency building for lay health  
56 613 workers is an intangible force driving basic public health services in Southwest China. *BMC*  
57 614 *Health Serv Res.* 2019 Aug 23;19(1):596.

- 1  
2  
3  
4  
5 615 [40]. Edwards NC, Roelofs SM. Sustainability: The elusive dimension of international health projects.  
6 616 *Can J Public Health*. 2006;97:45–9. <http://www.jstor.org/stable/41994677>.
- 7  
8 617 [41]. Li N, Yan LL, Niu W, Yao C, Feng X, Zhang J, et al. The effects of a community-based sodium  
9 618 reduction program in rural China—a cluster-randomized trial. *PLoS One*. 2016;11(12):e0166620..
- 10  
11 619 [42]. World Health Organization. WHO guideline on health policy and system support to optimize  
12 620 health care worker programmes. Geneva: World Health Organization. 2018.
- 13  
14 621 [43]. Campbell C, Scott K. Retreat from Alma Ata? The WHO's report on task shifting to health care  
15 622 workers for AIDS care in poor countries. *Glob Public Health*. 2011;6 (2):125–38.
- 16  
17 623 [44]. Jaskiewicz W, Tulenko K. Increasing health care worker productivity and effectiveness: a review  
18 624 of the influence of the work environment. *Hum Resour Health*. 2012; 10 (1):1.
- 19  
20 625 [45]. Hemminki E, Long Q, Zhang W-H, Wu Z, Raven J, Tao F, et al. Impact of financial and  
21 626 educational interventions on maternity care: results of cluster randomized trials in rural China,  
22 627 CHIMACA. *Matern Child Health J*. 2013; 17 (2):208–21.
- 23  
24 628 [46]. Meng Q, Li R, Cheng G, Blas E. Provision and financial burden of TB services in a financially  
25 629 decentralized system: a case study from Shandong, China. *Int J Health Plann Manag*.  
26 630 2004;19(S1):S45–62.
- 27  
28 631 [47]. Hutchison C, Khan MS, Yoong J, Lin X, Coker RJ. Financial barriers and coping strategies: a  
29 632 qualitative study of accessing multidrug-resistant tuberculosis and tuberculosis care in Yunnan,  
30 633 China. *BMC Public Health*. 2017 Feb 22;17(1):221.
- 31  
32 634 [48]. Wang SN, Deng YH, Shi YY, Shan LY, Liu Y. Investigation on knowledge of tuberculosis  
33 635 prevention and treatment among floating population tuberculosis patients in Putuo District,  
34 636 Shanghai. *Health Education and Promotion*. 2020,15(06):636-638.
- 35  
36 637 [49]. Ma Y, Liu YH, Du J, Tan SY, Fu YY, Ma LP, et al. Survey on awareness of core information of  
37 638 tuberculosis prevention and control knowledge in pulmonary tuberculosis patients. *Chinese*  
38 639 *Anti-tuberculosis Journal*. 2015 (10).
- 39  
40 640 [50]. Zou X, Zhou L, Wu H, Chen L, Zhou F, Gong C, Ye J, Ling L. The role of tuberculosis control  
41 641 institutes in delivering tuberculosis information to domestic migrants in China: A multi-level  
42 642 analysis of a nationwide cross-sectional survey. *Int J Infect Dis*. 2019; 86:94-101.
- 43  
44 643 [51]. Chen W, Li Y, Yang H, Ehiri J, Chen Z, Liu Y, Wang M, Liu S, Tang H, Li Y. Is tuberculosis  
45 644 health education reaching the public in China? A cross-sectional survey in Guizhou Province.  
46 645 *BMJ Open*. 2016; 6(9):e013534.
- 47  
48 646 [52]. Arulchelvan S, Elangovan R. Effective communication approaches in tuberculosis control:  
49 647 Health workers' perceptions and experiences. *Indian J Tuberc*. 2017;64(4):318-322.
- 50  
51  
52  
53  
54  
55  
56  
57  
58  
59  
60

## Appendix 1: Chi-square test results

## Factors associated with TTMS with lower delivery rate

| Variable                                                | Patients' peer supervision establish (n=235) |        | Train patient to use smart tools to assist TTMS (n=236) |        | Intensive phase DOT (n=236) |        | Continuation phase DOT (n=236) |        | Regular medicine delivery (n=234) |        | Sputum sample collection (n=236) |        |
|---------------------------------------------------------|----------------------------------------------|--------|---------------------------------------------------------|--------|-----------------------------|--------|--------------------------------|--------|-----------------------------------|--------|----------------------------------|--------|
|                                                         | N(%)                                         | P(X2)  | N(%)                                                    | P(X2)  | N(%)                        | P(X2)  | N(%)                           | P(X2)  | N(%)                              | P(X2)  | N(%)                             | P(X2)  |
| <b>Gender</b>                                           |                                              | 0.025* |                                                         | 0.429  |                             | 0.370  |                                | 0.867  |                                   | 0.033* |                                  | 0.760  |
| Female                                                  | 115(74.7)                                    |        | 88(57.1)                                                |        | 81(52.6)                    |        | 81(52.6)                       |        | 97(63.8)                          |        | 68(44.2)                         |        |
| Male                                                    | 69(87.3)                                     |        | 50(62.5)                                                |        | 47(58.8)                    |        | 43(53.8)                       |        | 62(77.5)                          |        | 37(46.3)                         |        |
| <b>Age</b>                                              |                                              | 0.23   |                                                         | 0.496  |                             | 0.023* |                                | 0.478  |                                   | 0.261  |                                  | 0.950  |
| 20-29                                                   | 73(83.9)                                     |        | 47(53.4)                                                |        | 55(61.8)                    |        | 51(57.3)                       |        | 63(70.8)                          |        | 40(44.9)                         |        |
| 30-39                                                   | 60(78.9)                                     |        | 46(60.5)                                                |        | 37(49.3)                    |        | 36(48.0)                       |        | 46(61.3)                          |        | 31(41.9)                         |        |
| 40-50                                                   | 33(68.8)                                     |        | 28(58.3)                                                |        | 19(43.2)                    |        | 24(50.0)                       |        | 35(74.5)                          |        | 22(44.9)                         |        |
| >50                                                     | 9(75.0)                                      |        | 9(75.0)                                                 |        | 13(81.3)                    |        | 8(66.7)                        |        | 10(83.3)                          |        | 6(50.0)                          |        |
| <b>Education</b>                                        |                                              | 0.927  |                                                         | 0.607  |                             | 0.123  |                                | 0.247  |                                   | 0.815  |                                  | 0.139  |
| Technical secondary school and below                    | 40(76.9)                                     |        | 33(64.7)                                                |        | 27(51.9)                    |        | 25(48.1)                       |        | 36(70.6)                          |        | 25(49.0)                         |        |
| College                                                 | 112(79.4)                                    |        | 81(57.0)                                                |        | 84(59.2)                    |        | 81(57.0)                       |        | 94(66.7)                          |        | 67(47.2)                         |        |
| University and above                                    | 32(78.0)                                     |        | 24(57.1)                                                |        | 17(41.5)                    |        | 18(43.9)                       |        | 29(70.7)                          |        | 13(31.0)                         |        |
| <b>Regions</b>                                          |                                              | 0.468  |                                                         | 0.323  |                             | 0.367  |                                | 0.399  |                                   | 0.360  |                                  | 0.820  |
| Relatively developed                                    | 54(77.1)                                     |        | 47(66.2)                                                |        | 37(53.6)                    |        | 38(55.1)                       |        | 46(67.6)                          |        | 32(45.1)                         |        |
| Medium developed                                        | 66(75.9)                                     |        | 48(55.2)                                                |        | 53(60.2)                    |        | 50(56.8)                       |        | 64(73.6)                          |        | 41(47.1)                         |        |
| Less developed                                          | 65(83.3)                                     |        | 44(65.4)                                                |        | 39(49.4)                    |        | 37(46.8)                       |        | 50(63.3)                          |        | 33(42.3)                         |        |
| <b>Primary Health Sector Type</b>                       |                                              | 0.044* |                                                         | 0.529  |                             | 0.574  |                                | 0.586  |                                   | 0.386  |                                  | 0.607  |
| Township health center                                  | 141(82.0)                                    |        | 104(60.1)                                               |        | 97(55.7)                    |        | 94(54.0)                       |        | 121(69.9)                         |        | 79(45.9)                         |        |
| Community health center                                 | 44(69.8)                                     |        | 35(55.6)                                                |        | 32(51.6)                    |        | 31(50.0)                       |        | 39(63.9)                          |        | 27(42.2)                         |        |
| <b>Professional Title</b>                               |                                              | 0.317  |                                                         | 0.591  |                             | 0.010* |                                | 0.036* |                                   | 0.801  |                                  | 0.019* |
| Non                                                     | 67(82.7)                                     |        | 46(56.8)                                                |        | 37(45.7)                    |        | 36(44.4)                       |        | 52(64.2)                          |        | 30(37.0)                         |        |
| Junior                                                  | 82(78.8)                                     |        | 65(62.5)                                                |        | 70(66.7)                    |        | 67(63.8)                       |        | 73(70.2)                          |        | 58(55.8)                         |        |
| Intermediate                                            | 19(67.9)                                     |        | 15(53.6)                                                |        | 12(42.9)                    |        | 13(46.4)                       |        | 17(63.0)                          |        | 9(32.1)                          |        |
| Deputy senior                                           | 2(66.7)                                      |        | 1(33.3)                                                 |        | 2(66.7)                     |        | 2(66.7)                        |        | 2(66.7)                           |        | 1(33.3)                          |        |
| <b>Times of training received in the past six month</b> |                                              | 0.299  |                                                         | 0.007* |                             | 0.147  |                                | 0.214  |                                   | 0.963  |                                  | 0.022* |
| 0                                                       | 11(91.7)                                     |        | 10(83.3)                                                |        | 8(66.7)                     |        | 8(66.7)                        |        | 8(72.7)                           |        | 7(58.3)                          |        |
| 1                                                       | 37(78.7)                                     |        | 28(57.1)                                                |        | 22(44.9)                    |        | 21(42.9)                       |        | 34(69.4)                          |        | 20(41.7)                         |        |
| 2                                                       | 93(76.2)                                     |        | 68(56.2)                                                |        | 63(51.6)                    |        | 62(50.8)                       |        | 82(67.8)                          |        | 46(37.4)                         |        |
| 3                                                       | 31(88.6)                                     |        | 27(77.1)                                                |        | 23(67.6)                    |        | 22(64.7)                       |        | 22(64.7)                          |        | 23(67.6)                         |        |
| >3                                                      | 13(68.4)                                     |        | 6(31.6)                                                 |        | 13(68.4)                    |        | 12(63.2)                       |        | 14(73.7)                          |        | 10(52.6)                         |        |
| <b>Working satisfaction</b>                             |                                              | 0.000* |                                                         | 0.042* |                             | 0.016* |                                | 0.012* |                                   | 0.008* |                                  | 0.027* |
| Dissatisfied                                            | 32(68.1)                                     |        | 27(56.3)                                                |        | 20(43.5)                    |        | 20(43.5)                       |        | 30(66.7)                          |        | 19 (40.4)                        |        |
| General                                                 | 26(60.5)                                     |        | 20(45.5)                                                |        | 19(43.2)                    |        | 17(38.6)                       |        | 22(50.0)                          |        | 14 (31.8)                        |        |
| Satisfied                                               | 76(85.4)                                     |        | 51(57.3)                                                |        | 52(57.8)                    |        | 51(56.7)                       |        | 64(71.9)                          |        | 39 (43.8)                        |        |



Very satisfied 50(92.6) 39(73.6) 38(70.4) 37(68.5) 44(81.5) 33(61.1)

Note: \*p<0.05, TTMS refers to tuberculosis treatment management service, DOT refers to directly observed therapy, MDR-TB refers to multi-drug resistance tuberculosis, Lower delivery rate refers to a rate below 90%, DOT refers to directly observed therapy

**Factors associated with TTMS with lower delivery rate (Continue)**

| Variable                             | Providing food or transport assistances for poor TB patient (n=230) | Providing DOT for migrant TB patient at their convenient time (n=235) | Providing subsistence allowance or psychological support for migrant patient (n=236) | Providing injection treatment for MDR-TB patient (n=234) | Providing supervision for newly released prison patient (n=236) | Referring TB patient with mental/psychological problems or alcohol/drug addiction (n=235) | Training cured TB patients to provide peer education (n=237) | Establishing platform for TB patients communication (n=237) |          |
|--------------------------------------|---------------------------------------------------------------------|-----------------------------------------------------------------------|--------------------------------------------------------------------------------------|----------------------------------------------------------|-----------------------------------------------------------------|-------------------------------------------------------------------------------------------|--------------------------------------------------------------|-------------------------------------------------------------|----------|
|                                      | N(%) P(X2)                                                          | N(%) P(X2)                                                            | N(%) P(X2)                                                                           | N(%) P(X2)                                               | N(%) P(X2)                                                      | N(%) P(X2)                                                                                | N(%) P(X2)                                                   | N(%) P(X2)                                                  |          |
| <b>Gender</b>                        |                                                                     | 0.215                                                                 | 0.153                                                                                | 0.313                                                    | 0.274                                                           | 0.669                                                                                     | 0.431                                                        | 0.957                                                       | 0.845    |
| Female                               | 40(51.3)                                                            |                                                                       | 72(91.1)                                                                             | 36(45.0)                                                 | 37(46.3)                                                        | 46(57.5)                                                                                  | 59(74.7)                                                     | 70(87.5)                                                    | 47(58.8) |
| Male                                 | 64(42.7)                                                            |                                                                       | 130(84.4)                                                                            | 80(51.9)                                                 | 59(38.8)                                                        | 93(60.4)                                                                                  | 122(79.2)                                                    | 136(87.7)                                                   | 89(57.4) |
| <b>Age</b>                           |                                                                     | 0.174                                                                 | 0.573                                                                                | 0.243                                                    | 0.561                                                           | 0.408                                                                                     | 0.242                                                        | 0.016*                                                      | 0.783    |
| <30                                  | 43(49.4)                                                            |                                                                       | 74(83.1)                                                                             | 50(56.8)                                                 | 37(42.5)                                                        | 57(64.0)                                                                                  | 71(79.8)                                                     | 84(94.4)                                                    | 55(61.8) |
| 30-39                                | 26(35.1)                                                            |                                                                       | 65(86.7)                                                                             | 32(42.1)                                                 | 26(34.2)                                                        | 40(52.6)                                                                                  | 56(73.7)                                                     | 61(80.3)                                                    | 42(55.3) |
| 40-50                                | 25(53.2)                                                            |                                                                       | 44(91.7)                                                                             | 22(45.8)                                                 | 21(43.8)                                                        | 26(54.2)                                                                                  | 39(83.0)                                                     | 44(91.7)                                                    | 28(58.3) |
| >50                                  | 6(50.0)                                                             |                                                                       | 10(83.3)                                                                             | 7(58.3)                                                  | 6(50.0)                                                         | 8(66.7)                                                                                   | 7(58.3)                                                      | 9(75.0)                                                     | 6(50.0)  |
| <b>Education</b>                     |                                                                     | 0.847                                                                 | 0.526                                                                                | 0.352                                                    | 0.198                                                           | 0.073                                                                                     | 0.189                                                        | 0.136                                                       | 0.194    |
| Technical secondary school and below | 22(44.0)                                                            |                                                                       | 45(88.2)                                                                             | 23(44.2)                                                 | 23(45.1)                                                        | 35(68.6)                                                                                  | 43(84.3)                                                     | 47(90.4)                                                    | 32(61.5) |
| College                              | 64(46.4)                                                            |                                                                       | 123(87.2)                                                                            | 75(53.2)                                                 | 60(42.9)                                                        | 84(59.2)                                                                                  | 110(77.5)                                                    | 127(89.4)                                                   | 85(59.9) |
| University and above                 | 17(41.5)                                                            |                                                                       | 34(81.0)                                                                             | 18(42.9)                                                 | 12(28.6)                                                        | 19(45.2)                                                                                  | 28(68.3)                                                     | 33(78.6)                                                    | 19(45.2) |
| <b>Regions</b>                       |                                                                     | 0.277                                                                 | 0.327                                                                                | 0.104                                                    | 0.613                                                           | 0.299                                                                                     | 0.343                                                        | 0.048                                                       | 0.737    |
| Relatively developed                 | 28(40.6)                                                            |                                                                       | 63(90.0)                                                                             | 36(50.7)                                                 | 31(44.3)                                                        | 44(62.9)                                                                                  | 56(80.0)                                                     | 57(80.3)                                                    | 39(54.9) |
| Medium developed                     | 36(42.4)                                                            |                                                                       | 77(87.5)                                                                             | 49(57.0)                                                 | 36(42.4)                                                        | 54(62.1)                                                                                  | 70(80.5)                                                     | 81(93.1)                                                    | 53(60.9) |
| Less developed                       | 40(52.6)                                                            |                                                                       | 63(81.8)                                                                             | 32(40.5)                                                 | 29(36.7)                                                        | 41(51.9)                                                                                  | 56(71.8)                                                     | 70(88.6)                                                    | 45(57.0) |

|                                                         |          |           |          |          |           |           |           |           |       |
|---------------------------------------------------------|----------|-----------|----------|----------|-----------|-----------|-----------|-----------|-------|
| <b>Primary Health Sector Type</b>                       |          | 0.885     | 0.498    | 0.613    | 0.394     | 0.127     | 0.528     | 0.157     | 0.768 |
| 2 Township health center                                | 76(45.5) | 147(85.5) | 87(50.6) | 73(42.7) | 107(61.8) | 135(78.5) | 115(89.6) | 101(58.4) |       |
| 3 Community health center                               | 28(44.4) | 56(88.9)  | 30(46.9) | 23(36.5) | 32(50.8)  | 47(74.6)  | 53(82.8)  | 36(56.3)  |       |
| <b>Professional Title</b>                               |          | 0.438     | 0.327    | 0.038*   | 0.004*    | 0.043*    | 0.870     | 0.683     | 0.789 |
| 6 Non                                                   | 35(43.8) | 67(82.7)  | 44(62.0) | 23(28.4) | 47(58.0)  | 61(76.3)  | 71(87.7)  | 43(53.1)  |       |
| 7 Junior                                                | 50(50.0) | 92(89.3)  | 26(47.3) | 55(53.4) | 68(64.8)  | 80(76.2)  | 94(88.7)  | 64(60.4)  |       |
| 8 Intermediate                                          | 9(33.3)  | 22(78.6)  | 16(53.3) | 9(33.3)  | 10(37.0)  | 22(81.5)  | 22(81.5)  | 16(59.3)  |       |
| 9 Deputy senior                                         | 1(33.3)  | 3(100.0)  | 31(38.8) | 1(33.3)  | 1(33.3)   | 2(66.7)   | 3(100.0)  | 2(66.7)   |       |
| <b>Times of training received in the past six month</b> |          | 0.256     | 0.579    | 0.497    | 0.001*    | 0.022*    | 0.140     | 0.788     | 0.099 |
| 13 0                                                    | 6(54.5)  | 9(81.8)   | 7(58.3)  | 6(54.5)  | 8(72.7)   | 11(100.0) | 10(83.3)  | 6(50.0)   |       |
| 14 1                                                    | 21(43.8) | 41(83.7)  | 23(46.9) | 15(3.5)  | 22(44.9)  | 36(73.5)  | 42(85.7)  | 30(61.2)  |       |
| 15 2                                                    | 46(39.3) | 103(85.1) | 55(45.5) | 42(35.0) | 70(57.4)  | 90(74.4)  | 106(86.9) | 63(51.6)  |       |
| 16 3                                                    | 20(57.1) | 33(94.3)  | 21(60.0) | 25(71.4) | 28(80.0)  | 31(88.6)  | 32(91.4)  | 27(77.1)  |       |
| 17 >3                                                   | 11(57.9) | 17(89.5)  | 11(57.9) | 8(42.1)  | 11(57.9)  | 14(73.7)  | 18(94.7)  | 11(57.9)  |       |
| <b>Working satisfaction</b>                             |          | 0.094     | 0.027*   | 0.115    | 0.263     | 0.452     | 0.021*    | 0.114     | 0.054 |
| 20 Dissatisfied                                         | 19(40.4) | 38(80.9)  | 18(37.5) | 16(34.0) | 24(51.1)  | 34 (72.3) | 40(83.3)  | 24(50.0)  |       |
| 21 General                                              | 15(35.7) | 33(76.7)  | 23(52.3) | 16(36.4) | 25(56.8)  | 28 (63.6) | 36(81.8)  | 21(47.7)  |       |
| 22 Satisfied                                            | 68(43.7) | 78(87.6)  | 42(47.7) | 35(40.2) | 53(59.6)  | 70 (79.5) | 25(50.0)  | 52(58.4)  |       |
| 23 Very satisfied                                       | 31(59.6) | 52(96.3)  | 33(61.1) | 28(51.9) | 36(66.7)  | 48 (88.9) | 52(96.3)  | 39(72.2)  |       |

24 Note: \*p<0.05, TTMS refers to tuberculosis treatment management service, DOT refers to directly observed therapy, MDR-TB refers to multi-drug resistance tuberculosis, Lower delivery rate refers to a rate below 90%, DOT refers to directly observed therapy

25

26

27

28

29

30

31

32

33

34

35

36

37

38

39

40

41

42

43

44

45

46



**STROBE 2007 (v4) Statement—Checklist of items that should be included in reports of *cross-sectional studies***

| Section/Topic                | Item # | Recommendation                                                                                                                                                                       | Reported on page # |
|------------------------------|--------|--------------------------------------------------------------------------------------------------------------------------------------------------------------------------------------|--------------------|
| <b>Title and abstract</b>    | 1      | (a) Indicate the study's design with a commonly used term in the title or the abstract                                                                                               | 2                  |
|                              |        | (b) Provide in the abstract an informative and balanced summary of what was done and what was found                                                                                  | 2                  |
| <b>Introduction</b>          |        |                                                                                                                                                                                      |                    |
| Background/rationale         | 2      | Explain the scientific background and rationale for the investigation being reported                                                                                                 | 4                  |
| Objectives                   | 3      | State specific objectives, including any prespecified hypotheses                                                                                                                     | 5                  |
| <b>Methods</b>               |        |                                                                                                                                                                                      |                    |
| Study design                 | 4      | Present key elements of study design early in the paper                                                                                                                              | 6                  |
| Setting                      | 5      | Describe the setting, locations, and relevant dates, including periods of recruitment, exposure, follow-up, and data collection                                                      | 7                  |
| Participants                 | 6      | (a) Give the eligibility criteria, and the sources and methods of selection of participants                                                                                          | 8, 9               |
| Variables                    | 7      | Clearly define all outcomes, exposures, predictors, potential confounders, and effect modifiers. Give diagnostic criteria, if applicable                                             | 8, 9               |
| Data sources/<br>measurement | 8*     | For each variable of interest, give sources of data and details of methods of assessment (measurement). Describe comparability of assessment methods if there is more than one group | 10, 11             |
| Bias                         | 9      | Describe any efforts to address potential sources of bias                                                                                                                            | 9                  |
| Study size                   | 10     | Explain how the study size was arrived at                                                                                                                                            | 9                  |
| Quantitative variables       | 11     | Explain how quantitative variables were handled in the analyses. If applicable, describe which groupings were chosen and why                                                         | 10                 |
| Statistical methods          | 12     | (a) Describe all statistical methods, including those used to control for confounding                                                                                                | 10                 |
|                              |        | (b) Describe any methods used to examine subgroups and interactions                                                                                                                  | 10                 |
|                              |        | (c) Explain how missing data were addressed                                                                                                                                          | 10                 |
|                              |        | (d) If applicable, describe analytical methods taking account of sampling strategy                                                                                                   | 10                 |
|                              |        | (e) Describe any sensitivity analyses                                                                                                                                                | 10                 |
| <b>Results</b>               |        |                                                                                                                                                                                      |                    |

|                          |     |                                                                                                                                                                                                                                                                                                                                                                                                               |       |
|--------------------------|-----|---------------------------------------------------------------------------------------------------------------------------------------------------------------------------------------------------------------------------------------------------------------------------------------------------------------------------------------------------------------------------------------------------------------|-------|
| Participants             | 13* | (a) Report numbers of individuals at each stage of study—eg numbers potentially eligible, examined for eligibility, confirmed eligible, included in the study, completing follow-up, and analysed<br>(b) Give reasons for non-participation at each stage<br>(c) Consider use of a flow diagram                                                                                                               | 11,12 |
| Descriptive data         | 14* | (a) Give characteristics of study participants (eg demographic, clinical, social) and information on exposures and potential confounders<br>(b) Indicate number of participants with missing data for each variable of interest                                                                                                                                                                               | 11,12 |
| Outcome data             | 15* | Report numbers of outcome events or summary measures                                                                                                                                                                                                                                                                                                                                                          | 12-15 |
| Main results             | 16  | (a) Give unadjusted estimates and, if applicable, confounder-adjusted estimates and their precision (eg, 95% confidence interval). Make clear which confounders were adjusted for and why they were included<br>(b) Report category boundaries when continuous variables were categorized<br>(c) If relevant, consider translating estimates of relative risk into absolute risk for a meaningful time period |       |
| Other analyses           | 17  | Report other analyses done—eg analyses of subgroups and interactions, and sensitivity analyses                                                                                                                                                                                                                                                                                                                |       |
| <b>Discussion</b>        |     |                                                                                                                                                                                                                                                                                                                                                                                                               |       |
| Key results              | 18  | Summarise key results with reference to study objectives                                                                                                                                                                                                                                                                                                                                                      | 16-20 |
| Limitations              | 19  | Discuss limitations of the study, taking into account sources of potential bias or imprecision. Discuss both direction and magnitude of any potential bias                                                                                                                                                                                                                                                    | 21    |
| Interpretation           | 20  | Give a cautious overall interpretation of results considering objectives, limitations, multiplicity of analyses, results from similar studies, and other relevant evidence                                                                                                                                                                                                                                    | 21    |
| Generalisability         | 21  | Discuss the generalisability (external validity) of the study results                                                                                                                                                                                                                                                                                                                                         | 21    |
| <b>Other information</b> |     |                                                                                                                                                                                                                                                                                                                                                                                                               |       |
| Funding                  | 22  | Give the source of funding and the role of the funders for the present study and, if applicable, for the original study on which the present article is based                                                                                                                                                                                                                                                 | 22    |

\*Give information separately for cases and controls in case-control studies and, if applicable, for exposed and unexposed groups in cohort and cross-sectional studies.

**Note:** An Explanation and Elaboration article discusses each checklist item and gives methodological background and published examples of transparent reporting. The STROBE checklist is best used in conjunction with this article (freely available on the Web sites of PLoS Medicine at <http://www.plosmedicine.org/>, Annals of Internal Medicine at <http://www.annals.org/>, and Epidemiology at <http://www.epidem.com/>). Information on the STROBE Initiative is available at [www.strobe-statement.org](http://www.strobe-statement.org).

# BMJ Open

## Tuberculosis treatment management in primary healthcare sectors: a mixed-methods study investigating delivery status and barriers from organizational and patient perspectives

|                                 |                                                                                                                                                                                                                                                                                                                                                                                                                                                                                                                                                                                                                                                                                                                                                                                                                                                                                                                                                                                                                                                                                                                                                                                                                                                                                       |
|---------------------------------|---------------------------------------------------------------------------------------------------------------------------------------------------------------------------------------------------------------------------------------------------------------------------------------------------------------------------------------------------------------------------------------------------------------------------------------------------------------------------------------------------------------------------------------------------------------------------------------------------------------------------------------------------------------------------------------------------------------------------------------------------------------------------------------------------------------------------------------------------------------------------------------------------------------------------------------------------------------------------------------------------------------------------------------------------------------------------------------------------------------------------------------------------------------------------------------------------------------------------------------------------------------------------------------|
| Journal:                        | <i>BMJ Open</i>                                                                                                                                                                                                                                                                                                                                                                                                                                                                                                                                                                                                                                                                                                                                                                                                                                                                                                                                                                                                                                                                                                                                                                                                                                                                       |
| Manuscript ID                   | bmjopen-2021-053797.R1                                                                                                                                                                                                                                                                                                                                                                                                                                                                                                                                                                                                                                                                                                                                                                                                                                                                                                                                                                                                                                                                                                                                                                                                                                                                |
| Article Type:                   | Original research                                                                                                                                                                                                                                                                                                                                                                                                                                                                                                                                                                                                                                                                                                                                                                                                                                                                                                                                                                                                                                                                                                                                                                                                                                                                     |
| Date Submitted by the Author:   | 15-Feb-2022                                                                                                                                                                                                                                                                                                                                                                                                                                                                                                                                                                                                                                                                                                                                                                                                                                                                                                                                                                                                                                                                                                                                                                                                                                                                           |
| Complete List of Authors:       | Zhou, Jiani; Army Medical University, Department of Social Medicine and Health Service Management<br>Pu, Jie; Army Medical University, Department of Social Medicine and Health Service Management<br>Wang, Qingya; Chongqing institute of Tuberculosis prevention and Treatment, Department of districts and counties<br>Zhang, Rui; Army Medical University, Department of Social Medicine and Health Service Management<br>Liu, Shili; Army Medical University, Department of Social Medicine and Health Service Management<br>Wang, Geng; Army Medical University, Department of Social Medicine and Health Service Management<br>Zhang, Ting; Chongqing Institute of Tuberculosis Prevention and Treatment, Department of districts and counties<br>Chen, Yong; Army Medical University, Department of Social Medicine and Health Service Management<br>Xing, Wei; Army Medical University, Department of Social Medicine and Health Service Management<br>Liu, Jiaqing; Army Medical University, Department of Social Medicine and Health Service Management<br>Hu, Daiyu; Chongqing Institute of Tuberculosis Prevention and Treatment, Department of districts and counties<br>Li, Ying; Army Medical University, Department of Social Medicine and Health Service Management |
| <b>Primary Subject Heading</b>: | Health services research                                                                                                                                                                                                                                                                                                                                                                                                                                                                                                                                                                                                                                                                                                                                                                                                                                                                                                                                                                                                                                                                                                                                                                                                                                                              |
| Secondary Subject Heading:      | Health services research, Infectious diseases                                                                                                                                                                                                                                                                                                                                                                                                                                                                                                                                                                                                                                                                                                                                                                                                                                                                                                                                                                                                                                                                                                                                                                                                                                         |
| Keywords:                       | Tuberculosis < INFECTIOUS DISEASES, PRIMARY CARE, HEALTH SERVICES ADMINISTRATION & MANAGEMENT                                                                                                                                                                                                                                                                                                                                                                                                                                                                                                                                                                                                                                                                                                                                                                                                                                                                                                                                                                                                                                                                                                                                                                                         |
|                                 |                                                                                                                                                                                                                                                                                                                                                                                                                                                                                                                                                                                                                                                                                                                                                                                                                                                                                                                                                                                                                                                                                                                                                                                                                                                                                       |

1  
2  
3  
4  
5  
6  
7  
8  
9  
10  
11  
12  
13  
14  
15  
16  
17  
18  
19  
20  
21  
22  
23  
24  
25  
26  
27  
28  
29  
30  
31  
32  
33  
34  
35  
36  
37  
38  
39  
40  
41  
42  
43  
44  
45  
46  
47  
48  
49  
50  
51  
52  
53  
54  
55  
56  
57  
58  
59  
60

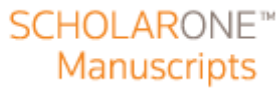



I, the Submitting Author has the right to grant and does grant on behalf of all authors of the Work (as defined in the below author licence), an exclusive licence and/or a non-exclusive licence for contributions from authors who are: i) UK Crown employees; ii) where BMJ has agreed a CC-BY licence shall apply, and/or iii) in accordance with the terms applicable for US Federal Government officers or employees acting as part of their official duties; on a worldwide, perpetual, irrevocable, royalty-free basis to BMJ Publishing Group Ltd ("BMJ") its licensees and where the relevant Journal is co-owned by BMJ to the co-owners of the Journal, to publish the Work in this journal and any other BMJ products and to exploit all rights, as set out in our [licence](#).

The Submitting Author accepts and understands that any supply made under these terms is made by BMJ to the Submitting Author unless you are acting as an employee on behalf of your employer or a postgraduate student of an affiliated institution which is paying any applicable article publishing charge ("APC") for Open Access articles. Where the Submitting Author wishes to make the Work available on an Open Access basis (and intends to pay the relevant APC), the terms of reuse of such Open Access shall be governed by a Creative Commons licence – details of these licences and which [Creative Commons](#) licence will apply to this Work are set out in our licence referred to above.

Other than as permitted in any relevant BMJ Author's Self Archiving Policies, I confirm this Work has not been accepted for publication elsewhere, is not being considered for publication elsewhere and does not duplicate material already published. I confirm all authors consent to publication of this Work and authorise the granting of this licence.

1  
2  
3  
4  
5  
6 1 **Tuberculosis treatment management in primary health**  
7  
8 2 **care sectors: a mixed-methods study investigating delivery**  
9  
10 3 **status and barriers from organizational and patient**  
11  
12 4 **perspectives**  
13  
14  
15  
16 5

17  
18 6 Jiani Zhou<sup>1</sup>, Jie Pu<sup>1</sup>, Qingya Wang<sup>2</sup>, Rui Zhang<sup>1</sup>, Shili Liu<sup>1</sup>, Geng Wang<sup>1</sup>, Ting Zhang<sup>2</sup>, Yong  
19 7 Chen<sup>1</sup>, Wei Xing<sup>1</sup>, Jiaqing Liu<sup>1</sup>, Daiyu Hu<sup>2§</sup>, YingLi<sup>1§</sup>  
20  
21  
22

23  
24 8 <sup>1</sup> Department of Social Medicine and Health Service Management, Army Medical University  
25 9 (Third Military Medical University), Chongqing, China.  
26  
27

28  
29 10 <sup>2</sup> Department of districts and counties, Chongqing Institute of TB Prevention and Treatment,  
30 11 Jiulongpo District, Chongqing, China.  
31  
32

33  
34 12 § Correspondence: Daiyu Hu, Chongqing Institute of TB Prevention and Treatment,  
35 13 Jiulongpo District, Chongqing, China (E-mail:hukaixiu@263.com); Ying Li, Department of  
36 14 Social Medicine and Health Service Management, Army Medical University (Third Military  
37 15 Medical University), China (E-mail:lilyliying2012@163.com).  
38  
39  
40  
41  
42  
43  
44  
45  
46  
47  
48  
49  
50  
51  
52  
53  
54  
55  
56  
57  
58  
59  
60

1  
2  
3  
4  
5  
6  
7  
8  
9  
10  
11  
12  
13  
14  
15  
16  
17  
18  
19  
20  
21  
22  
23  
24  
25  
26  
27  
28  
29  
30  
31  
32  
33  
34  
35  
36  
37  
38  
39  
40  
41  
42  
43  
44  
45  
46  
47  
48  
49  
50  
51  
52  
53  
54  
55  
56  
57  
58  
59  
60

## 22 Abstract

23 **Objective** Tuberculosis (TB) treatment management service (TTMS) is crucial to improve  
24 patient adherence to treatment. Under the TB integrated control model in China, healthcare  
25 workers (HCWs) in primary healthcare (PHC) sectors are responsible for TTMS delivering.  
26 This mixed method study aims to explore the status of and barriers to TTMS delivery faced  
27 by HCWs in PHC sectors from the health organizational and patient perspectives.

28 **Design** We completed 261 questionnaire survey with TB HCWs and 459 with TB patients in  
29 PHC sectors, and we also conducted 20 semi-structured interviews with health organizational  
30 leaders, TB HCWs and TB patients. SPSS 22.0 and the framework approach were used for  
31 data analysis.

32 **Setting** Primary healthcare sectors in Southwest China

33 **Results** Our results showed that TTMS delivery rate by HCWs in PHC sectors was <90%  
34 (88.4%) on average, and the delivery rates of intensive and continuation phase DOT were  
35 only 54.7% and 53.0% respectively. HCWs with high working satisfaction and junior title  
36 were more likely to deliver first-time home visit and DOT services. Our results suggested that  
37 barriers to TTMS delivery at organizational level included limited patient-centered  
38 approaches, inadequate resources and incentives, insufficient trainings, poor cross-sectional  
39 coordination, and strict performance assessment. At patient level, barriers include low  
40 socioeconomic characteristics, poor health literacy, and TB-related social stigma.

41 **Conclusion:** TTMS in Southwest China still need further improvement, and this study  
42 highlighted specific barriers to TTMS delivery in PHC sectors. Comprehensive measures

1  
2  
3  
4  
5 43 are urgent needed to address those barriers in organizational and patient levels to promote  
6  
7  
8 44 TB control in Southwest China.  
9

10 45 **Key words:** tuberculosis, treatment management, healthcare worker, primary healthcare  
11  
12

13 46 **Strengths and limitations of this study**  
14

- 15  
16 47 ● This is a mixed method study on accessing the status of and barriers to tuberculosis  
17  
18 48 treatment management services (TTMS) delivery by healthcare workers (HCWs) in  
19  
20 49 primary healthcare sectors (PHC) in Southwest China.  
21  
22  
23 50 ● This study collected both perspectives from organizations and patients followed by using  
24  
25 51 the PRISM model to evaluate specific barriers to TTMS delivery.  
26  
27  
28 52 ● We collected a total of 720 questionnaires with HCWs and patients, and conducted 20  
29  
30 53 interviews with leaders, HCWs and patients in totally 71 PHC sectors.  
31  
32  
33 54 ● Further studies are required to provide more evidence for producing more effective TB  
34  
35 55 control strategies since well-evidenced implementation strategies that able to address  
36  
37 56 current barriers in TTMS delivery were not able to be provided in this study.  
38  
39  
40  
41  
42  
43  
44  
45  
46  
47  
48  
49  
50  
51  
52  
53  
54  
55  
56  
57  
58  
59  
60



## 64 **Introduction**

65 Tuberculosis (TB) is one of the leading causes of death worldwide [1]. According to the  
66 World Health Organization (WHO) global TB report 2021, there was a large global drop in  
67 the number of newly diagnosed TB (fall from 7.1 million in 2019 to 5.8 million in 2020) [1].  
68 However, the most immediate consequence of the large drop is an increase in the number of  
69 deaths from TB in 2020 (raised from an estimated 1.2 million deaths among HIV-negative  
70 people in 2019 to an estimated 1.3 million in 2020) [1]. The Chinese government pays high  
71 attention to addressing the TB epidemic and sets the goal of reducing the incidence of TB to  
72 less than 55/100,000 population by 2022 and maintaining a low mortality rate below  
73 3/100,000 population [2, 3]. Though TB cases notification in China has decreased from  
74 70.6/100,000 population in 2012 to 58/100,000 population in 2019 with a treatment success  
75 rate above 90% [1, 2], China is listed as high-burden countries with TB, HIV-associated  
76 TB, and multidrug/rifampicin-resistant TB (MDR/RR-TB) for 2021-2025 in the WHO global  
77 TB report 2021 [1].

78 The goal of China's latest Action Plan to Stop TB (2019-2022) is to reduce the incidence  
79 of TB nationwide to less than 55/100,000 population by 2022 and maintain a low mortality  
80 rate below 3/100,000 population [2]. To accomplish this goal, TB prevention and control  
81 program has been further improved with enhanced services capacity, strengthened the  
82 prevention and control measures for key populations and key areas, advanced the  
83 standardized diagnosis and treatment coverage, and increased the public awareness level of  
84 tuberculosis prevention and control [2]. Patients' adherence to anti-TB treatment plays an

1  
2  
3  
4  
5 85 important role to cure and avoid DR-TB, hence treatment management is essentially  
6  
7  
8 86 necessary for TB patients to ensure treatment adherence, monitor adverse side-effects from  
9  
10  
11 87 treatment, and avoid development of DR-TB [4]. Since Chinese National 12th Five-Year TB  
12  
13 88 Control Plan (2011-2015) came out in 2011, TB control model in China started using the  
14  
15  
16 89 integrated TB control model in most regions [5]. Under the integrated TB control model, the  
17  
18  
19 90 Centers of Disease Control (CDCs) are responsible for TB program governance, surveillance,  
20  
21 91 training and health promotion; the TB designated hospitals are responsible for diagnosis and  
22  
23  
24 92 treatment; and the Primary Healthcare (PHC) sectors are responsible for referrals, tracing,  
25  
26  
27 93 health education and TB treatment management services (TTMS) [5]. Later, China's National  
28  
29 94 13th Five-Year TB Control Plan (2016-2020) combined with the Action Plan to Stop TB  
30  
31  
32 95 (2019-2022) requested to further strengthen TB prevention and control which emphasized  
33  
34  
35 96 TTMS and strengthened the implementation of various measures to reduce TB epidemic in  
36  
37  
38 97 China [2, 6]. TTMS is one of the key BPHS programs for all residents in China (one of the  
39  
40  
41 98 priorities of the new health reform launched in 2009) which are delivered by TB HCWs in  
42  
43  
44 99 PHC sectors [6, 7]. The BPHS guideline sets a target to accomplish both standard TTMS rate  
45  
46  
47 100 and treatment success rate above 90% [6, 7]. TTMS for diagnosed TB patients are delivered  
48  
49  
50 101 by HCWs in PHC sector under the supervision of CDC with coordination from other  
51  
52  
53 102 departments, such as assistances from the TB designated hospital to deal with patients  
54  
55  
56 103 side-effects and supports from department of education to conduct health education to student  
57  
58  
59 104 population [7].  
60

105 Study in Jiangxi indicated that TTMS under the integrated TB control model did improve

1  
2  
3  
4  
5 106 treatment outcomes [8]. Study in Wuhan pointed that TTMS was crucial important for  
6  
7  
8 107 monitoring treatment complications and reducing the development of DR-TB [9, 10]. Other  
9  
10  
11 108 studies showed that in more developed areas in China, TTMS coverage was highly improved  
12  
13  
14 109 and produced impressive effects [8, 9, 11-14]. Few studies reported the delivery status to  
15  
16 110 TTMS delivery in resource-limited and mountain regions with high TB/DR-TB burden in  
17  
18  
19 111 China. One study found that only 37.1% of TB patients received TTMS by HCWs in West  
20  
21 112 China [15] and study in Chongqing found that 34.3% of TB patients never received TTMS by  
22  
23  
24 113 HCWs [16]. However, very few studies focus on the perspective of HCWs to evaluate the  
25  
26 114 current TTMS program under the integrated TB control model. Therefore, this study not only  
27  
28  
29 115 aim to assess the delivery status of TTMS program from the perspectives of both  
30  
31 116 organizations and patients, but also to explore the specific barriers to TTMS delivery faced  
32  
33  
34 117 by HCWs in PHC sectors to provide evidence for promote TB control and treatment  
35  
36  
37 118 outcome.

## 39 119 **Methods**

### 41 120 **Study design**

42  
43  
44 121 This cross-sectional study utilized mixed research methods [17] to collect data from June to  
45  
46  
47 122 December 2018. Questionnaire surveys and semi-structured in-depth interviews were  
48  
49  
50 123 conducted to evaluate the delivery of TTMS in PHC sectors from both health organizational  
51  
52 124 (HCWs and leaders) and patient's perspectives.

### 53 125 **Study Setting**

54  
55  
56  
57 126 The prevalence of TB in the western region was significantly higher than the central and  
58  
59  
60

1  
2  
3  
4  
5 127 eastern regions in China [18]. Chongqing Municipality is located at the junction of Yangtze  
6  
7  
8 128 and Jialing rivers and has a population of 32.09 million [19]. This region is a relatively  
9  
10 129 developed socioeconomic status, with a gross domestic product (GDP) at 2.5 trillion CNY  
11  
12  
13 130 and a per capita GDP at 55.6 thousand CNY in 2020 [19]. The growing population of  
14  
15  
16 131 Chongqing depends more on the secondary and tertiary industry as the main economic  
17  
18 132 activity [19]. The urbanization rate and literacy rate are 69.5% and 98.4% respectively in  
19  
20  
21 133 2021 [19]. The TB incidence of Chongqing Municipality (2019) is ranking the tenth  
22  
23 134 (75/100,000) in China [20].

26 135 Guizhou Province is a mountainous province in West China and has a population of 38.6  
27  
28 136 [21]. 50.9% of its population depends on tertiary industry as a main source of income [21].  
29  
30 137 The employment rate and literacy rate are 49.0% and 93.3% respectively in 2020 [21]. The  
31  
32 138 area maintains a relatively less developed socioeconomic status, with a GDP at 1.8 trillion  
33  
34 139 CNY and a per capita GDP at 46.3 thousand CNY in 2020 [21]. The incidence of TB in  
35  
36 140 Guizhou Province (2019) is ranking the third (133.5/100,000) following Xinjiang and Tibet  
37  
38  
39 141 [20].

44 142 A stratified random sampling method was used to select study sites in Chongqing  
45  
46 143 Municipality and Guizhou Province as follows. First, all counties/districts in Chongqing  
47  
48 144 municipality and Guizhou province were grouped into three levels according to their  
49  
50 145 socioeconomic status (GDP) in 2018 [22]: the relatively developed (GDP in the highest  
51  
52 146 30%), the medium developed (GDP in the middle 40%), and the relatively less developed  
53  
54 147 (GDP in the lowest 30%). Then, from each group of counties/districts, 4 counties/districts  
55  
56  
57  
58  
59  
60

1  
2  
3  
4  
5 148 were randomly selected as study sites. A total of twelve districts/counties were finally  
6  
7  
8 149 included in this study. All of the PHC sectors (included both CHCs and THCs) in the 12  
9  
10  
11 150 selected counties/districts, totally 71 PHC sectors were included in this study.  
12

### 13 151 **Study participants and data Collection**

#### 14 152 **Quantitative study**

15  
16 153 All adult pulmonary TB patients who met the following criteria were targeted for recruitment  
17  
18 154 from the 71 PHC sectors in the 12 selected counties/districts: (1) registered at TB  
19  
20  
21 155 dispensaries and were diagnosed as drug-sensitive pulmonary TB patients according to  
22  
23  
24 156 national TB diagnosis standards, (2) completed standard anti-TB drug treatment for at least 4  
25  
26  
27 157 months which indicated that received TTMS for both intensive (first 2 months) and  
28  
29  
30 158 continuation phases (following 4 months), (3) aged 15 years and older. Patients who: (1) with  
31  
32  
33 159 extra-pulmonary TB, (2) could not express themselves clearly (had disturbance of  
34  
35  
36 160 consciousness or difficulties with speech or hearing), (3) unwilling to participated in the  
37  
38  
39 161 study were excluded. Patient recruitment was facilitated by local PHC sectors in the study  
40  
41  
42 162 counties/districts. First, research group members provided a detailed explanation about the  
43  
44  
45 163 study objectives to all potential participants. Then, those who were willing to participate in  
46  
47  
48 164 the study were asked to read and sign the informed consent form to assure of confidentiality.

49  
50 165 The sample size was estimated using the Kish and Leslie formula as follows [23]:

51  
52 166 
$$n = Z_{\alpha}^2 P (1 - P) / d^2.$$

53  
54  
55 167  $n$  is the minimum desired sample size.  $Z_{\alpha}$  is the standard normal deviate, usually set as 1.96,  
56  
57  
58 168 corresponding to a 5% level of significance.  $P$  is the average rate of TB treatment  
59  
60

1  
2  
3  
4  
5 169 management, set at 37.1% based on estimates from the available literature [15].  $d$  is the  
6  
7  
8 170 degree of accuracy (precision), set at 5% (0.05). Therefore, the calculated minimum sample  
9  
10  
11 171 size for patient-participants was 359. A total 481 TB patients were recruited to participate in  
12  
13 172 the survey, and 16 declined. Six TB patients <15 years old were excluded, and finally 459 TB  
14  
15  
16 173 patients were included in the analysis (response rate were 95.4%).

17  
18 174 All HCWs who were TB control medical staff in PHC sectors in the selected  
19  
20  
21 175 counties/districts and were willing to participate in the study were recruited as participants.  
22  
23  
24 176 TB HCWs who were unwilling to participate in the study were excluded. There were a total  
25  
26 177 of 261 TB HCWs in the selected counties/districts. Finally, all 261 TB HCWs were recruited  
27  
28  
29 178 and willing to participate in the survey, and zero declined (response rate was 100.0%).  
30  
31  
32 179 HCWs recruitment was facilitated by local CDCs in the study districts/counties.

33  
34 180 Structured questionnaires were conducted to collect data among the participated TB  
35  
36  
37 181 patients and HCWs. Among TB patients, structured survey involved demographic  
38  
39  
40 182 information (e.g., gender, age, and residence), and TTMS received from HCWs during  
41  
42  
43 183 treatment (e.g., intensive phase DOT and continuation phase DOT). Among HCWs, the  
44  
45  
46 184 questionnaire included demographic and working-related information (e.g., gender, age,  
47  
48  
49 185 professional title, and working years), working satisfaction, and delivery situation of TTMS  
50  
51  
52 186 (e.g., the first-time home visit). Questionnaires were designed by our research team based on  
53  
54  
55 187 the existing literature reports, and then consulted related experts. All questionnaires were  
56  
57  
58 188 executed by trained investigators from our research group in a meeting room or clinic room at  
59  
60 189 each PHC sector. HCWs, who were willing to voluntary participated in the study, were asked

1  
2  
3  
4  
5 190 to read the informed consent form and then sign the informed consent form. Each completed  
6  
7  
8 191 questionnaire was checked and examined by trained investigators for quality control.  
9

## 10 192 **Qualitative study**

11  
12  
13 193 In-depth interviews were utilized to explore the current status and identify barriers to the  
14  
15  
16 194 TTMS delivery from HCWs to TB patients. Purposive sampling method was used to selected  
17  
18  
19 195 participants with different background, age, and experiences related to TTMS. The integrated  
20  
21 196 TB control model was established and TTMS provided in all included counties/districts.  
22  
23  
24 197 Therefore, in-depth interviews were conducted with: HCWs from the PHC sectors of  
25  
26  
27 198 different socioeconomic levels who had delivered TTMS for at least one year during the  
28  
29 199 study period; leaders from the local CDC and the Health Commission who were responsible  
30  
31  
32 200 for TB control program during the study period; and patients from regions of different  
33  
34 201 socioeconomic levels who had received TTMS and were about to end their TB treatment  
35  
36  
37 202 during the study, which ensured patients had sufficient experiences related to TTMS. During  
38  
39  
40 203 recruitment, all HCWs, leaders, and patients were approached and provided with detailed  
41  
42 204 explanations about the study and its objectives. Those who expressed interest in volunteering  
43  
44  
45 205 to participate in the in-depth interview were asked to read and sign the informed consent form  
46  
47 206 as a confirmation of their voluntary participation in the study.  
48

49  
50 207 The sample size of the qualitative study was determined by the point of data ‘saturation’  
51  
52 208 [24]. The recruitment continued until evidence of data saturation was obtained, whereby  
53  
54  
55 209 adding further participants did not generate new findings. For enhancing the information’s  
56  
57  
58 210 trustworthiness and credibility of interviews, each interview was conducted face-to-face by at  
59  
60



1  
2  
3  
4  
5 211 least two trained interviewers. During each interview, one interviewer performed the  
6  
7  
8 212 interview according to the semi-structured topic guides, while the other interviewer was  
9  
10  
11 213 responsible for making notes of key information and may supplement questions to the  
12  
13 214 interview as necessary. At the end of each interview, interviewers discussed the findings and  
14  
15  
16 215 key information obtained from the interview to confirm whether a supplementary interview  
17  
18 216 was required. The information related to TTMS delivery was cross validated between patients  
19  
20  
21 217 (service receivers) and HCWs (service providers) to increase information trustworthiness.  
22  
23  
24 218 Documentary sources, such as regulations and standard service procedures, were also utilized  
25  
26 219 to enhance information credibility. A total of nine purposely selected leaders, seven HCWs  
27  
28  
29 220 and four patients participated in the in-depth interviews in this study.

30  
31 221 Semi-structured topic guides with open-ended questions were used for all interviews.  
32  
33  
34 222 The guiding framework for the topic design was the Practical Robust Implementation and  
35  
36 223 Sustainability Model (PRISM) [25]. This model considered how the intervention design,  
37  
38  
39 224 recipients, external environment, and implementation and sustainability infrastructure  
40  
41  
42 225 influence health program implementation and success, which widely used as theoretical  
43  
44 226 framework in implementation research [25-27]. With the guide of the PRISM, this study  
45  
46  
47 227 collected data on barriers on TTMS delivery in the following aspects: (1) intervention design;  
48  
49  
50 228 (2) recipients; (3) external environment; and (4) implementation and sustainability  
51  
52 229 infrastructure. The adaptation of PRISM for this study is illustrated in Figure1. All interviews  
53  
54  
55 230 were conducted in Mandarin or local language (Chongqing dialect and Guizhou dialect) in  
56  
57 231 meeting rooms in PHC sectors. Only participant and interviewers in the interview location.  
58  
59  
60

1  
2  
3  
4  
5 232 Each interview lasted about 40-60 minutes and was audio-recorded with consent of the  
6  
7  
8 233 participants.

## 10 234 **Data analysis**

### 13 235 **Quantitative analysis**

16 236 Data were entered using Epi Data 3.1 and then analyzed using the Statistical Package for the  
17  
18 237 Social Sciences (SPSS 22.0 (IBM Corporation, Armonk, NY, USA)). Missing data were  
19  
20  
21 238 excluded during analyze (when analyzing gender, age, medical school education, major,  
22  
23  
24 239 professional title, number of BPHS programs undertook, monthly Income and working  
25  
26 240 satisfaction of HCWs etc., only 259, 249, 247, 256, 240, 225, 242 and 259 HCWs  
27  
28  
29 241 respectively responded those questions in survey, and so we deleted the HCWs who did not  
30  
31 242 respond this question). A two-tailed probability level of  $p < 0.05$  was chosen as the level of  
32  
33  
34 243 statistical significance. Missing data were excluded from analysis. Descriptive statistics were  
35  
36  
37 244 used to describe study participants' demographic characteristics and TTMS delivery rates.  
38  
39 245 Factors associated with lower delivery rate ( $< 90\%$ ) screened by the Chi-square test ( $p < 0.05$ )  
40  
41  
42 246 (Appendix A) were entered into multivariate logistic regression models (delivery rate  $< 90\%$   
43  
44 247 = 1, delivery rate  $> 90\%$  = 0), which were used to examine the effects of those factors on  
45  
46  
47 248 TTMS delivery.

### 50 249 **Qualitative analysis**

52 250 The framework approach was used to analyze all qualitative data following a five steps  
53  
54  
55 251 process: (1) familiarization, (2) creating theoretical framework, (3) indexing, (4)  
56  
57 252 summarizing and (5) data synthesis and interpretation [28-29]. Following that, all interviews  
58  
59  
60

1  
2  
3  
4  
5 253 were carefully transcribed into Word Documents, reviewed for accuracy, and then being  
6  
7  
8 254 coded and classified by our research team members. We identified themes on TTMS delivery  
9  
10 255 barriers for four domains of the PRISM [25], including: (1) intervention design (PHC sectors  
11  
12  
13 256 resource and patient-centered manner); (2) the recipients (human resource and incentives,  
14  
15  
16 257 training support, socio-economy and health literacy); (3) external environment (health  
17  
18  
19 258 insurance, cross-sectional coordination, and social stigma); and (4) implementation and  
20  
21 259 sustainability infrastructure (performance assessment). All the names of participants were  
22  
23  
24 260 removed in quotations of the results to keep anonymity. According to the 13th Five-Year TB  
25  
26 261 Prevention and Control Plan, the targeted TTMS delivery rate from HCWs to TB patients  
27  
28  
29 262 is >90% [5]. Therefore, delivery rate below 90% is described as lower delivery rate in this  
30  
31  
32 263 manuscript.

### 34 35 264 **Definitions**

36  
37  
38 265 Primary healthcare (PHC) sectors in China include the community health centers (CHCs) and  
39  
40  
41 266 stations in urban areas, township hospital centers (THCs) and village health clinics in rural  
42  
43  
44 267 areas [4]. Tuberculosis healthcare workers (TB HCWs) include health professionals in PHC  
45  
46  
47 268 sectors who are responsible for TTMS delivery. Tuberculosis treatment management service  
48  
49 269 (TTMS) is one of the key basic public health services for all residents in China, which are  
50  
51  
52 270 delivered by TB HCWs in PHC sectors, including 7 themes: the first-time home visit, health  
53  
54  
55 271 education, supervising drug intake, follow-up supervision, case closing evaluation, other  
56  
57 272 services, and services among patient's family members [6, 7]. Both the Chinese National  
58  
59  
60

1  
2  
3  
4  
5 273 BPHS guideline and the 13th Five-Year TB Prevention and Control Plan set a target TTMS  
6  
7  
8 274 rate of >90% [6, 7]. Therefore, in this study, a delivery rate <90% is described as a lower  
9  
10  
11 275 delivery rate.

## 12 13 276 **Patient and public involvement**

14  
15  
16 277 There were no patients or public involvement in the design, conduct, reporting and in the  
17  
18 278 dissemination plans of this research.

## 19 20 21 279 **Results**

### 22 23 280 **Characteristics of participants**

#### 24 25 281 *Participants for the quantitative study*

26  
27  
28 282 A total of 261 TB HCWs and 459 TB patients were included in the quantitative analysis  
29  
30  
31 283 (Table 1). Among the HCWs, 66.4% (n=172) were female, 71.5% (n=178) were aged 20-39  
32  
33  
34 284 years old, 72.4% (n=189) worked at THCs, 50.0% (n=120) and 35.8% (n=86) had junior and  
35  
36  
37 285 non-professional titles respectively. Near 60% (n=155) of the HCWs had junior college  
38  
39 286 education and over 80% (n=202) had medical school education background (32.4% majored  
40  
41  
42 287 in clinical medicine and 30.5% majored in nursing). More than half (56.4%, n=127) of the  
43  
44  
45 288 HCWs undertook 2-3 BPHS programs in PHC sector, and only 7.6% (n=17) were  
46  
47 289 dedicatedly in charge of TB program. The majority (67.4%, n=163) had a monthly income of  
48  
49  
50 290 2500-4500 CNY, and notably, 40.5% (n=105) reported a low working satisfaction.

51  
52 291 Among the TB patients, the majority of the patients were male (70%, n=324), married  
53  
54  
55 292 (69.7%, n=320), Han ethnicity (78.2%, n=359), and 41.6% (n=191) were aged  $\geq 60$ . 82.4%  
56  
57  
58 293 (n=378) of the patients were rural residences and 95.2% (n=437) were permanent residences.

294 Almost 70% (n=315) of the patients were farmer/migrant workers, and 56.0% (n=257) had  
 295 only primary/below education.

296 **Table 1 Characteristics of TB HCW participants surveyed by questionnaires**

| Demographic characteristic                 | Number | Percentage |
|--------------------------------------------|--------|------------|
| <b><i>HCWs in questionnaire survey</i></b> |        |            |
| Gender (n=259)                             |        |            |
| female                                     | 172    | 66.4       |
| male                                       | 87     | 33.6       |
| Age (n=249)                                |        |            |
| 20-29                                      | 94     | 37.8       |
| 30-39                                      | 84     | 33.7       |
| 40-50                                      | 52     | 20.9       |
| >50                                        | 19     | 7.6        |
| Education (n=259)                          |        |            |
| Technical secondary school or below        | 60     | 23.2       |
| Junior college                             | 155    | 59.8       |
| Undergraduate college or above             | 44     | 17.0       |
| Medical school education (n=247)           |        |            |
| Yes                                        | 202    | 81.8       |
| No                                         | 45     | 18.2       |
| Major (n=256)                              |        |            |
| Clinical Medicine                          | 83     | 32.4       |
| Nursing                                    | 78     | 30.5       |
| Public Health                              | 33     | 12.9       |
| Chinese Medicine                           | 27     | 10.5       |
| Other                                      | 17     | 6.6        |
| Region (n=261)                             |        |            |
| Relatively developed                       | 93     | 35.6       |
| Medium developed                           | 89     | 34.1       |
| Less developed                             | 79     | 30.3       |
| Working place (n=261)                      |        |            |
| Township health center                     | 189    | 72.4       |
| Community health center                    | 72     | 27.6       |
| Professional Title (n=240)                 |        |            |
| Non                                        | 86     | 35.8       |
| Junior                                     | 120    | 50.0       |
| Intermediate                               | 31     | 12.9       |
| Deputy senior                              | 3      | 1.3        |
| Number of BPHS programs undertook (n=225)  |        |            |

|    |                                                   |     |      |
|----|---------------------------------------------------|-----|------|
| 1  |                                                   |     |      |
| 2  |                                                   |     |      |
| 3  |                                                   |     |      |
| 4  |                                                   |     |      |
| 5  | TB program only                                   | 17  | 7.6  |
| 6  | 2-3                                               | 127 | 56.4 |
| 7  | $\geq 4$                                          | 80  | 36.0 |
| 8  |                                                   |     |      |
| 9  | Monthly Income (CNY) (n=242)                      |     |      |
| 10 | <2500                                             | 52  | 21.5 |
| 11 | 2500-3500                                         | 89  | 36.8 |
| 12 | 3500-4500                                         | 74  | 30.6 |
| 13 | >4500                                             | 27  | 11.2 |
| 14 |                                                   |     |      |
| 15 | Working satisfaction (n=259)                      |     |      |
| 16 | High satisfaction                                 | 58  | 22.4 |
| 17 | Middle satisfaction                               | 96  | 37.1 |
| 18 | Low satisfaction                                  | 105 | 40.5 |
| 19 |                                                   |     |      |
| 20 |                                                   |     |      |
| 21 | <b><i>TB patients in questionnaire survey</i></b> |     |      |
| 22 | Gender (n=459)                                    |     |      |
| 23 | Male                                              | 324 | 70.6 |
| 24 | Female                                            | 135 | 29.4 |
| 25 |                                                   |     |      |
| 26 | Age (n=459)                                       |     |      |
| 27 | <40                                               | 94  | 20.5 |
| 28 | 40-49                                             | 96  | 20.9 |
| 29 | 50-59                                             | 78  | 17.0 |
| 30 | $\geq 60$                                         | 191 | 41.6 |
| 31 |                                                   |     |      |
| 32 | Ethnicity (n=459)                                 |     |      |
| 33 | Han                                               | 359 | 78.2 |
| 34 | Ethnic minority                                   | 100 | 21.8 |
| 35 |                                                   |     |      |
| 36 | Marital status (n=459)                            |     |      |
| 37 | Single                                            | 69  | 15.0 |
| 38 | Married                                           | 320 | 69.7 |
| 39 | Divorced/Widowed                                  | 70  | 15.3 |
| 40 |                                                   |     |      |
| 41 | Residence (n=459)                                 |     |      |
| 42 | Urban                                             | 81  | 17.6 |
| 43 | Rural                                             | 378 | 82.4 |
| 44 |                                                   |     |      |
| 45 | Registered information (n=459)                    |     |      |
| 46 | Permanent resident                                | 437 | 95.2 |
| 47 | Migrant                                           | 22  | 4.8  |
| 48 |                                                   |     |      |
| 49 | Education (n=459)                                 |     |      |
| 50 | Primary and below                                 | 257 | 56.0 |
| 51 | Junior middle school                              | 125 | 27.2 |
| 52 | High school and above                             | 77  | 16.8 |
| 53 |                                                   |     |      |
| 54 | Occupation (n=459)                                |     |      |
| 55 | Staff/Cadre/Retiree                               | 50  | 10.9 |
| 56 | Self-employed                                     | 10  | 2.2  |
| 57 | Farmer/Migrant worker                             | 315 | 68.6 |
| 58 |                                                   |     |      |
| 59 |                                                   |     |      |
| 60 |                                                   |     |      |

|         |    |      |
|---------|----|------|
| Student | 20 | 4.4  |
| Others  | 64 | 13.9 |

Note: *TB* refers to tuberculosis, *HCW* refers to health care worker, *BPHS* refers to basic public health services.

### 297 ***Participants for the qualitative study***

298 9 leaders, 7 HCWs, and 4 TB patients were interviewed. Most leaders were male (7/9) with  
 299 deputy senior titles (5/9) and worked for 7.6 years on average. The majority of HCWs were  
 300 female (5/7), technical secondary school educated (6/7), majored in clinical medicine (4/5),  
 301 4/5 came from CHCs with had none or junior professional titles. Besides, among the 4  
 302 interviewed patients, drug-sensitive TB (DS-TB) and 2 DR-TB respectively, all of them  
 303 completed anti-TB therapy (6-8 months therapy for DS-TB, and 24 months therapy for  
 304 DR-TB).

### 305 **Quantitative results about TTMS delivery status**

306 TB patient's survey showed that 76.0% (n=349) of the patients ever received TTMS from  
 307 HCWs in CHCs during the whole course of treatment (it was 83.7% and 76.7% during their  
 308 intensive and continuation phase respectively). Just around 40.0% (n=189) ever received  
 309 TTMS from HCWs in THCs/village clinics during their whole course of treatment (it was  
 310 45.1% and 42.3% during intensive and continuation phase respectively). Only 17.0% (n=78)  
 311 received standard TTMS from HCWs during the whole course of treatment (it was 18.1% and  
 312 55.8% for intensive and continuation phase respectively). 2.8% (n=13) were never received  
 313 TTMS from HCWs (it was 3.9 % and 7.2% during intensive and continuation phase  
 314 respectively). (Table 2)



315 **Table 2** TTMS TB patient received from HCWs during treatment (n=459)

| Variable                                             | Number | Percentage |
|------------------------------------------------------|--------|------------|
| Ever received TTMS from HCWs in CHCs                 |        |            |
| Intensive phase                                      | 384    | 83.7       |
| Continuation phase                                   | 352    | 76.7       |
| Whole course of treatment                            | 349    | 76.0       |
| Ever received TTMS from HCWs in THCs/village clinics |        |            |
| Intensive phase                                      | 207    | 45.1       |
| Continuation phase                                   | 194    | 42.3       |
| Whole course of treatment                            | 189    | 41.2       |
| Received standard TTMS from HCWs                     |        |            |
| Intensive phase                                      | 83     | 18.1       |
| Continuation phase                                   | 256    | 55.8       |
| Whole course of treatment                            | 78     | 17.0       |
| Never received TTMS from HCWs                        |        |            |
| Intensive phase                                      | 18     | 3.9        |
| Continuation phase                                   | 33     | 7.2        |
| Whole course of treatment                            | 13     | 2.8        |

Note: *TB* refers to tuberculosis, *TTMS* refers to tuberculosis treatment management services, *CHC* refers to community health center, *THC* refers to township health center, *HCW* refers to health care worker.

316 HCWs' survey showed that the average delivery rate of TTMS (totally involved 60  
317 service items) in PHC sectors was 88.4 %, and 13 TTMS items reported a lower delivery rate  
318 (<90%). Notably, the delivery rates of DOT in intensive phase and continuation phase were  
319 low, with only 54.7% and 53.0% respectively. Besides, less than half (44.9%) of HCWs in  
320 PHC sectors provided service of collecting patients' sputum samples during the follow-up  
321 supervision. Less than half of the HCWs provided food or transport assistances for poor TB  
322 patient (45.2%), provided subsistence allowance or psychological support for migrant patient  
323 (49.6%), and provided injection treatment for MDR-TB patient (41.0%). Moreover, less than  
324 60% provided supervision for newly released prison patient (58.9%) and established platform

325 for TB patient communication (57.8%). (Table 3)

326 **Table 3** TTMS with lower delivery rate provided by HCWs in PHC sectors (n=239)

| Services                                                                                                                  | Delivery rate N (%) |
|---------------------------------------------------------------------------------------------------------------------------|---------------------|
| <b><i>First time home visit</i></b>                                                                                       |                     |
| Patients' peer supervision establish (n=235)                                                                              | 185 (78.7)          |
| <b><i>DOT</i></b>                                                                                                         |                     |
| Intensive phase DOT (n=236)                                                                                               | 129 (54.7)          |
| Continuation phase DOT (n=236)                                                                                            | 125 (53.0)          |
| Regular medicine delivery (n=234)                                                                                         | 160 (68.4)          |
| <b><i>Follow-up supervision</i></b>                                                                                       |                     |
| Sputum sample collection (n=236)                                                                                          | 106 (44.9)          |
| <b><i>Others</i></b>                                                                                                      |                     |
| Providing food or transport assistances for poor TB patient (n=230)                                                       | 104 (45.2)          |
| Providing subsistence allowance or psychological support for migrant patient (n=236)                                      | 117 (49.6)          |
| Providing DOT for migrant TB patient at their convenient time (n=235)                                                     | 203 (86.4)          |
| Providing injection treatment for MDR-TB patient (n=234)                                                                  | 96 (41.0)           |
| Providing supervision for newly released prison patient (n=236)                                                           | 139 (58.9)          |
| Training cured TB patients to provide peer education (n=237)                                                              | 208 (87.8)          |
| Establishing platform for TB patients communication (n=237)                                                               | 137 (57.8)          |
| Referring TB patient with mental/psychological problems or alcohol/drug addiction to receive professional therapy (n=235) | 182 (77.4)          |

Note: *Lower delivery rate* refers to a rate below 90%, *TB* refers to tuberculosis, *TTMS* refers to tuberculosis treatment management service, *DOT* refers to directly observed therapy, *MDR-TB* refers to multidrug-resistant tuberculosis

327 **Factors associated with TTMS with lower delivery rate**

328 Multivariate logistic regression analysis showed that HCWs with high working satisfaction  
 329 were less likely to have a lower delivery rate to establish patients peer supervision as needed  
 330 (OR=0.182, 95%CI: 0.059-0.562). Among both intensive and continuation phase DOT,  
 331 HCWs with junior title (OR=0.424, 95%CI: 0.215-0.835) and high working satisfaction  
 332 (OR=0.326, 95%CI: 0.140-0.766) were less likely to have lower delivery rate. Similarly,  
 333 HCWs with junior title (OR=0.458, 95%CI: 0.242-0.865) and high working satisfaction  
 334 (OR=0.395, 95%CI: 0.160-0.826) were more likely to deliver sputum sample collection

1  
2  
3  
4  
5 335 service (Table 4).  
6  
7  
8  
9  
10  
11  
12  
13  
14  
15  
16  
17  
18  
19  
20  
21  
22  
23  
24  
25  
26  
27  
28  
29  
30  
31  
32  
33  
34  
35  
36  
37  
38  
39  
40  
41  
42  
43  
44  
45  
46  
47  
48  
49  
50  
51  
52  
53  
54  
55  
56  
57  
58  
59  
60

For peer review only

336 **Table 4** Multivariate logistic regression analysis of factors associated with lower delivery rate of TTMS by HCWs

| Variable                    | Patients' peer supervision establish (n=235)<br>OR (95%CI) | Intensive phase DOT (n=236)<br>OR (95%CI) | Continuation phase DOT (n=236)<br>OR (95%CI) | Regular medicine delivery (n=234)<br>OR (95%CI) | Sputum sample collection (n=236)<br>OR (95%CI) | Injection treatment for MDR-TB patient (n=234)<br>OR (95%CI) | Providing supervision for newly released prison patient (n=236)<br>OR (95%CI) |
|-----------------------------|------------------------------------------------------------|-------------------------------------------|----------------------------------------------|-------------------------------------------------|------------------------------------------------|--------------------------------------------------------------|-------------------------------------------------------------------------------|
| <b>Gender</b>               |                                                            |                                           |                                              |                                                 |                                                |                                                              |                                                                               |
| Female                      | Reference                                                  |                                           |                                              | Reference                                       |                                                |                                                              |                                                                               |
| Male                        | 0.577 (0.258-1.270)                                        |                                           |                                              | 0.605(0.320-1.147)                              |                                                |                                                              |                                                                               |
| <b>Age</b>                  |                                                            |                                           |                                              |                                                 |                                                |                                                              |                                                                               |
| >50                         |                                                            | Reference                                 |                                              |                                                 |                                                |                                                              |                                                                               |
| 40-50                       |                                                            | 2.053(0.985-4.279)                        |                                              |                                                 |                                                |                                                              |                                                                               |
| 30-39                       |                                                            | 2.230(0.947-5.248)                        |                                              |                                                 |                                                |                                                              |                                                                               |
| <30                         |                                                            | Default                                   |                                              |                                                 |                                                |                                                              |                                                                               |
| <b>Professional Title</b>   |                                                            |                                           |                                              |                                                 |                                                |                                                              |                                                                               |
| Non                         |                                                            | Reference                                 | Reference                                    |                                                 | Reference                                      | Reference                                                    | Reference                                                                     |
| Junior                      |                                                            | 0.424(0.215-0.835)*                       | 0.419(0.228-0.771) *                         |                                                 | 0.458(0.242-0.865) *                           | 0.307(0.159-0.594)                                           | 0.681(0.364-1.273)                                                            |
| Intermediate                |                                                            | 0.625(0.233-1.787)                        | 0.860(0.355-2.804)                           |                                                 | 1.137(0.432-2.995)                             | 0.686(0.258-1.827)                                           | 2.107(0.829-5.353)                                                            |
| Deputy senior               |                                                            | 0.276(0.021-3.605)                        | 0.415(0.024-5.020)                           |                                                 | 1.644(0.131-20.581)                            | 0.809(0.054-12.031)                                          | 2.534(0.179-35.887)                                                           |
| <b>Training frequency</b>   |                                                            |                                           |                                              |                                                 |                                                |                                                              |                                                                               |
| 0/6 months                  |                                                            |                                           |                                              |                                                 | Reference                                      | Reference                                                    | Reference                                                                     |
| 1/6 months                  |                                                            |                                           |                                              |                                                 | 2.474(0.566-10.822)                            | 3.533(0.767-16.277)                                          | 4.752(0.858-26.335)                                                           |
| 2/6 months                  |                                                            |                                           |                                              |                                                 | 2.890(0.729-11.465)                            | 2.217(0.534-9.199)                                           | 2.568(0.500-13.182)                                                           |
| 3/6 months                  |                                                            |                                           |                                              |                                                 | 0.776(0.165-3.660)                             | 0.607(0.126-2.923)                                           | 0.990(0.162-6.048)                                                            |
| >3/6 months                 |                                                            |                                           |                                              |                                                 | 2.307(0.432-12.327)                            | 2.841(0.503-16.-54)                                          | 3.346(0.508-22.044)                                                           |
| <b>Working satisfaction</b> |                                                            |                                           |                                              |                                                 |                                                |                                                              |                                                                               |
| Low satisfaction            | Reference                                                  | Reference                                 | Reference                                    | Reference                                       | Reference                                      |                                                              |                                                                               |
| Middle satisfaction         | 0.354(0.168-0.745) *                                       | 0.449(0.219-0.903) *                      | 0.584 (0.312-1.095)                          | 0.582(0.309-1.094)                              | 0.661(0.304-1.533)                             |                                                              |                                                                               |
| High satisfaction           | 0.182(0.059-0.562) *                                       | 0.326(0.140-0.766) *                      | 0.347(0.163-0.741) *                         | 0.375(0.165-0.853)                              | 0.395(0.160-0.826) *                           |                                                              |                                                                               |

Note: *Lower delivery rate* refers to rate below 90%, *TTMS* refers to tuberculosis treatment management service, *DOT* refers to directly observed therapy, *MDR-TB* refers to multidrug-resistance tuberculosis, *CI* refers to confidence interval, \* refers to  $p < 0.05$ .

337

339 **Qualitative results about barriers to TTMS delivery**

340 The in-depth interviews disclosed numerous barriers to TTMS delivery from the four core

341 PRISM domains as follows (Table 5):

342 **Table 5** Barriers of TTMS delivery by HCWs in PHC sectors

| Core PRISM domains            | Results                                                                                                                                                                                                                                                                                                                                                                                                                                                                                                                                                                                                                                                                                                                                                                                                                                                                                                                                                                                                                                                                                                                                                          | Quotations                                                                                                                                                                                                                                                                                                                                                                                                                                                                                                                                                                                                                                                                                                                                                                                                                                                                                                                                                                                                                                                                                                                                                                                                                                                                                                                      |
|-------------------------------|------------------------------------------------------------------------------------------------------------------------------------------------------------------------------------------------------------------------------------------------------------------------------------------------------------------------------------------------------------------------------------------------------------------------------------------------------------------------------------------------------------------------------------------------------------------------------------------------------------------------------------------------------------------------------------------------------------------------------------------------------------------------------------------------------------------------------------------------------------------------------------------------------------------------------------------------------------------------------------------------------------------------------------------------------------------------------------------------------------------------------------------------------------------|---------------------------------------------------------------------------------------------------------------------------------------------------------------------------------------------------------------------------------------------------------------------------------------------------------------------------------------------------------------------------------------------------------------------------------------------------------------------------------------------------------------------------------------------------------------------------------------------------------------------------------------------------------------------------------------------------------------------------------------------------------------------------------------------------------------------------------------------------------------------------------------------------------------------------------------------------------------------------------------------------------------------------------------------------------------------------------------------------------------------------------------------------------------------------------------------------------------------------------------------------------------------------------------------------------------------------------|
| Intervention:<br>TTMS program | <p><b>Patient-centered manner:</b><br/>Both DS-TB and MDR-TB patients stated they received TTMS from HCWs in PHC sectors by telephone. Some HCWs reported that some patients expressed antipathy to DOT and the current approach to deliver TTMS, maybe new e-health approach should be considered.</p>                                                                                                                                                                                                                                                                                                                                                                                                                                                                                                                                                                                                                                                                                                                                                                                                                                                          | <p><i>Got telephone calls during the first 2 months, very few afterwards...I didn't like (DOT). (DS-TB patient)</i><br/> <i>Only received telephone calls from HCW in town, once per month. (MDR-TB patient)</i><br/> <i>There is one MDR-TB patient...say it is annoying to call him every day (by us to deliver TTMS program). (HCW)</i><br/> <i>I think that we can remind patients to take medicine via digital technologies. Although, the elders may not use phone adroitly, we find that they missed drug taking less frequently than the young patients. So, we can remind young patients through APP in mobile phone. (HCW)</i></p>                                                                                                                                                                                                                                                                                                                                                                                                                                                                                                                                                                                                                                                                                    |
| Recipients                    | <p><b>Resources and incentive in PHC sectors:</b><br/>Majority HCWs and leaders stated that PHC sectors, particularly THCs faced insufficient human resource HCWs to deliver TTMS program. HCWs often undertook more than 2 BPHS programs which led to hardship to deliver standard TTMS to TB patients. And inadequate professional capability, particularly village doctors, led to patients' distrusts and therefore hindered TTMS delivery.<br/>Many HCWs claimed that PHC sectors lacked transportation tools to facilitate home-visits especially for remote rural patients<br/>Moreover, majority HCWs and leaders reported that lack of incentive for HCWs in TTMS program, and almost all HCWs unsatisfied with low subsidy, allowance, and salary regarding their heavy workload and infection risk.<br/>Out-of-pocket expenditure for transportations and telephone charges for TTMS delivery was also reported by HCWs.</p> <p><b>Training support to HCWs in PHC sectors:</b><br/>Many HCWs stated that TB trainings lack of adequate professional knowledge and communication skill for TTMS delivery. Both HCWs and leaders mentioned lack of</p> | <p><i>Too many works, it is hard to communicated well with patients...I have 2-3 days a week to give phone calls to TB patients, too tired...we often take two works by one person, the workloads are huge. (HCW)</i><br/> <i>Insufficient and unstable HCWs ...one HCW leave, then we need to train a new one...(CDC leader)</i><br/> <i>HCWs, especially at TCHs, low quality, patients don't trust them. (CDC leader)</i><br/> <i>Lacking transportation tools for home-visit, some (patients) live in rural area, far away...need to take a long distance to visit one patient. (HCW)</i><br/> <i>We face high risks of infection. There are no subsidies for us to provide manage. Funding for TTMS delivery is not separated from subsidies for the whole BPHS program. Actually, those subsidies from BPHS is not even enough for my telephone and transportation costs. (HCW)</i><br/> <i>Without subsidies, the HCWs motivation and working satisfaction is low...they just to complete tasks and will not really care about the quality of TTMS. (CDC leader)</i></p> <p><i>2-3 TB trainings each year, from CDC...combined with other (BPHS) trainings...and I think this training is not effective. (HCW)</i><br/> <i>It is harder to communicate with MDR-TB patients. Sometimes they seem know more about</i></p> |

|                                   |                                                                                                                                                                                                                                                                                                                                                                                                                                                        |                                                                                                                                                                                                                                                                                                                                                                                                                                                                                                                                                                                                                                                                                         |
|-----------------------------------|--------------------------------------------------------------------------------------------------------------------------------------------------------------------------------------------------------------------------------------------------------------------------------------------------------------------------------------------------------------------------------------------------------------------------------------------------------|-----------------------------------------------------------------------------------------------------------------------------------------------------------------------------------------------------------------------------------------------------------------------------------------------------------------------------------------------------------------------------------------------------------------------------------------------------------------------------------------------------------------------------------------------------------------------------------------------------------------------------------------------------------------------------------------|
|                                   | <p>TB-specific training for HCWs.</p>                                                                                                                                                                                                                                                                                                                                                                                                                  | <p><i>treatment than me. Prolonged illness makes a doctor of a patient. (HCW)</i></p>                                                                                                                                                                                                                                                                                                                                                                                                                                                                                                                                                                                                   |
|                                   | <p><b>Patient's socio-economy:</b><br/>Most HCWs and leaders consistently agreed that most TB patients were old age and living with low socioeconomic status, have high risk to reject TTMS. Due to the long treatment period, the financial burden on MDR-TB patients is particularly heavy, resulting in poor adherence and TTMS difficulty. Some HCWs also stated the hardship to deliver TTMS among migrant patients since hard to reach them.</p> | <p><i>During treatment in later period, I didn't (take sputum test), no money, no money for transportation. (DS-TB patient)</i><br/><i>Cannot bear the financial burden... costs of follow-up examinations, CT, and medicines. (MDR-TB patient)</i><br/><i>Because TB itself is a "disease of the poor", most TB patients have financial difficulties with bad lifestyles and poor literacy. (HC leader)</i> Migrant patients are hard to reach...some have no stable work and often change their phone numbers...don't like TTMS. (HCW)<br/><i>I told him/her the dangerousness and seriousness of MDR-TB, he/she still didn't keep treatment, only told me: 'no money'. (HCW)</i></p> |
|                                   | <p><b>Patient's health literacy:</b><br/>Vast majorities of HCWs stated that some patients refused to receive TTMS to manage their nonadherence behaviors due to poor health literacy and weak TB-related awareness.</p>                                                                                                                                                                                                                               | <p><i>I stopped treatment because I felt good about myself. (MDR-TB patient)</i><br/><i>Some (patients) don't prioritize their health and dislike our TTMS...they are aged and less educated...Some have very poor adherence to TB treatment. (HCW)</i></p>                                                                                                                                                                                                                                                                                                                                                                                                                             |
| External environment              | <p><b>Health insurance:</b><br/>All patients stated they still faced financial hardship even with health insurance. Most HCWs and leaders stated that the current health insurance for DS-TB patients cannot cover all medicines and examinations related to side-effect, and it is more inadequate for MDR-TB patients with longer treatment, which added financial burden among poor TB patients and led to hardship for TTMS delivery.</p>          | <p><i>(After reimbursement,) medicines would cost hundreds, and the costs of CT scans can't be reimbursed. (MDR-TB patient)</i><br/><i>The health insurance of reimbursement of TB treatment is very strict, anti-TB drugs are free, and other liver protection medicines and tests are not. (HC leader)</i></p>                                                                                                                                                                                                                                                                                                                                                                        |
|                                   | <p><b>Cross-sectional coordination:</b><br/>Majority HCWs and leaders reported the difficulties to conduct cross-sectional coordination for TTMS delivery, especially coordination from TB designated hospitals. One leaders also stated a poor cross-sectional coordination between PHC sectors with the departments of education, public security, civil affair, and finance for TTMS delivery.</p>                                                  | <p><i>It is hard to connect with TB designated hospitals' doctors, they are very busy. One patients stopped treatment and said it is doctors' advice...but I cannot confirm. (HCW)</i><br/><i>The department of finance, education, civil affairs, public security, and others, ... they are not highly motivated (to give us support in TTMS program). (CDC leader)</i></p>                                                                                                                                                                                                                                                                                                            |
|                                   | <p><b>Social stigma:</b><br/>TB-related social stigma was mentioned by many HCWs. Urban and young patients with more concerns of privacy issue were more likely to refuse home-visit from HCWs.</p>                                                                                                                                                                                                                                                    | <p><i>There is one patient, it's impossible to go to his/her home... due to privacy, he/she doesn't like people around know they have TB. (HCW)</i><br/><i>Some TB patients, especially urban and youth patients, don't like us to go to their home for home-visit... (They are) worried about how people around would think of them. (HCW)</i></p>                                                                                                                                                                                                                                                                                                                                     |
| Implementation and Sustainability | <p><b>Performance assessment:</b><br/>All HCWs and some of the leaders stated that the performance assessment for TTMS may exist</p>                                                                                                                                                                                                                                                                                                                   | <p><i>(Performance) assessment is unreasonable, more works you do, more mistakes you make, and this is unfair. There are no rewards when you perform</i></p>                                                                                                                                                                                                                                                                                                                                                                                                                                                                                                                            |



|                |                                                                                                                                                         |                                                                                                                                                                                                                                                                                                                      |
|----------------|---------------------------------------------------------------------------------------------------------------------------------------------------------|----------------------------------------------------------------------------------------------------------------------------------------------------------------------------------------------------------------------------------------------------------------------------------------------------------------------|
| infrastructure | irrationality considering heavy workload. And leaders pointed out that this could lead to substandard TTMS, and also hinder HCW's working enthusiastic. | <i>well...while, any negative feedbacks (such as patients' dissatisfactions with treatment costs) would affect our performance assessment. (HCW) The indexes are quite high (considering HCW's workload). Sometimes, the purpose becomes to complete indexes but not to really care about patients. (CDC leader)</i> |
|----------------|---------------------------------------------------------------------------------------------------------------------------------------------------------|----------------------------------------------------------------------------------------------------------------------------------------------------------------------------------------------------------------------------------------------------------------------------------------------------------------------|

Note: TTMS refers to tuberculosis treatment management service, TB refers to tuberculosis, HCW refers to healthcare workers, PHC refers to primary healthcare, BPHC refers to basic primary healthcare, DS-TB refers to drug-sensitive tuberculosis, DOT refers to directly observed therapy, MDR-TB refers to multidrug-resistant TB, CT refers to Computed Tomography.

### 343 **1) Interventions**

344 Current TTMS program was mainly delivered via telephone calls and lacked of sufficient  
 345 patient-centered manner which led to patient's antipathy to DOT. HCW suggested that  
 346 e-health approach, including APP would be good choice to deliver TTMS.

### 347 **2) Recipients:**

348 Most PHC sectors faced insufficient health human resource to deliver TTMS program. Every  
 349 HCW often undertook more than 2 BPHS programs. HCWs with this heavy work load of  
 350 BPHS had difficulty to deliver standard TTMS delivery. On the other hand, PHC sectors  
 351 lacked of transportation tools to facilitate home-visits especially for remote rural TB patients.  
 352 HCWs in PHC sectors also faced inadequate professional capability, especially village  
 353 doctors, which led to patients' distrusts and therefore hindered TTMS delivery by those  
 354 HCWs. On the other hand, PHC sectors lack of sufficient incentive for HCWs in TTMS  
 355 program, and almost all HCWs unsatisfied with low salary, and subsidy regarding their heavy  
 356 workload and infection risk of TB. In addition, out-of-pocket expenditure for transportation  
 357 and telephone charge for TTMS delivery could further influence HCW's working motivation,  
 358 performance, and attrition. Moreover, inadequate qualified training (the content lack of  
 359 communication skills and professional knowledge for TTMS delivery, and the training

1  
2  
3  
4  
5 360 approach of TB trainings mixed with other BPHS programs and lacking of high quality  
6  
7  
8 361 TB-specific training for HCWs ) supports for TB HCWs were also reported by interviewers.  
9  
10 362 So current training could not provide much support in HCWs' capabilities and performance.  
11  
12

13 363 In terms of patient characteristics, the majority of interviewers claimed that TB is a  
14  
15 364 disease of the poor and most TB patients were disadvantaged group (aging, low education,  
16  
17 365 migrant and financial difficulty), particular MDR-TB patients with longer treatment period,  
18  
19 366 who had poor TB-related health literacy and had high risk to reject TTMS. HCWs also  
20  
21 367 mentioned the hardship to deliver TTMS among migrant patients due to hard to reach them.  
22  
23

24 368 **3) External environment:**  
25  
26  
27  
28

29 369 On the one hand, inadequate health insurance coverage for medicines and tests related to  
30  
31 370 side-effects accentuated financial burden among poor DS-TB patients and the health  
32  
33 371 coverage was more inadequate for MDR-TB patients with longer treatment period, which  
34  
35 372 reduced willingness to receive TTMS. On the other hand, difficulties in cross-sectional  
36  
37 373 coordination to assist TTMS delivery were reported, especially supports from TB designated  
38  
39 374 hospitals and also other departments like departments of public security and education.  
40  
41 375 Furthermore, TB-related social stigma was reported as one of the main barriers to conduct  
42  
43 376 home-visits among urban and young patients who care much privacy and were more likely to  
44  
45 377 refuse to accept home-visits from HCWs.  
46  
47  
48  
49

50 378 **4) Implementation and sustainability infrastructure:**  
51  
52  
53

54 379 The performance assessment for TB HCWs might exist irrationality considering their heavy  
55  
56 380 workload. One leader pointed out that to the purpose of TTMS delivery could become to  
57  
58  
59  
60



1  
2  
3  
4  
5 381 complete the targeted indicators, and therefore, lead to substandard TTMS to patients.  
6  
7  
8 382 Moreover, inappropriate performance assessment also hinder working motivation and  
9  
10 383 increased working attrition among HCWs to deliver TTMS.  
11  
12

### 13 384 **Discussion**

14  
15 385 In China, HCWs in PHC sectors are considered as an important part of the TB integrated  
16  
17 386 model and taking responsibility for TTMS delivery. This study assessed the delivery of  
18  
19 387 TTMS program by HCWs in PHC sectors in West China. Though we found that the TTMS  
20  
21 388 delivery rates in intensive phase and continuation phase were higher than previous study in  
22  
23 389 West China [15], the standard TTMS (at least 24 times TTMS during their treatment course)  
24  
25 390 delivery rate is far below the required rate of >90% according to the National TB Control  
26  
27 391 Plan [6]. Besides, our study showed that TB patients received DOT from HCW in CHCs (in  
28  
29 392 urban regions) was higher than that from HCW in THCs (in rural regions). This difference  
30  
31 393 might be explained by our qualitative results as interviewed HCWs reported the challenges to  
32  
33 394 delivery TTMS to remote rural patients due to patients' poor health literacy which is also  
34  
35 395 reported in other studies [18, 30], and our study also pointed the far away distance with  
36  
37 396 insufficient transportation tools for HCWs blocked TTMS delivery. In addition, our study  
38  
39 397 revealed that less than half of HCWs provided services of collecting patients' sputum  
40  
41 398 samples during follow-up supervision, which is much lower than the result reports in the  
42  
43 399 study in Guizhou (96.56%) [30]. Furthermore, we found a low level of working satisfaction  
44  
45 400 (22.4%) among TB HCWs, while, it is higher than previous study (12.2%) [31]. Our study  
46  
47 401 results indicated that HCWs with low working satisfaction were more likely to have a low  
48  
49  
50  
51  
52  
53  
54  
55  
56  
57  
58  
59  
60

1  
2  
3  
4  
5 402 delivery rate of first-time home visit, DOT, and sputum sample collection services. Efforts  
6  
7  
8 403 should be made to maintain and promote HCWs' working satisfaction to enhance TTMS  
9  
10  
11 404 delivery.

12  
13 405 Our study disclosed that the current TTMS delivery was confronted with various  
14  
15  
16 406 barriers, despite that TB HCWs in PHC sectors carried out TTMS program had made many  
17  
18  
19 407 achievements in West China. In the organizational level, we found that the TTMS programs  
20  
21  
22 408 itself existed several barriers for HCWs to delivery services. On the one hand, the national  
23  
24 409 TB action plans and nationwide TB survey in China [2, 9, 32] mentioned the cross-sectional  
25  
26 410 coordination for TTMS delivery, however, we found that HCWs in PHC sectors still lack of  
27  
28  
29 411 well coordination with other departments, such as coordination from department of education  
30  
31  
32 412 to support students treatment management, help from department of public security to trace  
33  
34 413 migrant patients' information. Particularly, HCWs from some PHC sectors faced barriers to  
35  
36  
37 414 access timely connections with TB HCWs from TB designated hospital in addressing TB  
38  
39  
40 415 patients' side effects and treatment adherence. It is difficult to realize the participation of the  
41  
42 416 whole society in TB control in China so far [33]. As the call by the Action Plan to Stop TB  
43  
44  
45 417 (2019 to 2022) in China [2], it is an emergent need to build a multi-sectorial collaboration  
46  
47  
48 418 mechanism led by the National Health Commission (NHC) in order to coordinate  
49  
50 419 cross-sectional efforts to support TB prevention and control program [29].

51  
52 420 The second barrier emerged at health organizational level is the approaches to delivery  
53  
54  
55 421 TTMS. We found TTMS were mainly delivered by telephone call, which consistent with  
56  
57  
58 422 previous studies in West China [15, 33], and the insufficient patient-centered manners could  
59  
60

1  
2  
3  
4  
5 423 result in patients' rejects to DOT and TTMS by HCWs. Previous study in Indonesia also  
6  
7  
8 424 reported that insufficient patient-centered care was the main treatment barriers for TB  
9  
10  
11 425 patients in high-burden TB settings [34]. Although research showed that home-visits and  
12  
13 426 DOT did lead to positive treatment outcome [35, 36], our study pointed out the need to  
14  
15  
16 427 provide TTMS with e-health approach, which was consistent with previous studies, and  
17  
18 428 previous studies demonstrated the effectiveness of e-health technology for promoting  
19  
20  
21 429 patients' treatment adherence [37-42]. It is deserved to explore internet-based case  
22  
23  
24 430 management model, such as digital supported self-management, and with the help of HCWs  
25  
26 431 in PHC sectors to deliver TTMS to TB patients who live in remote mountain area or against  
27  
28  
29 432 face-to-face DOT.

30  
31 433 The third barrier at organizational level is the health human resource for TTMS in PHC  
32  
33  
34 434 sectors. Other studies reported that PHC sectors especial in rural areas had a limited number  
35  
36  
37 435 of HCWs to conduct BPHS programs which led to heavy workload and "shortage of hands"  
38  
39 436 since HCWs often carried out multiple assigned services [43-45]. We consistently found that  
40  
41  
42 437 PHC sectors, particularly in THCs, faced human resource barriers in terms of insufficient  
43  
44  
45 438 number and inadequate professional capability to deliver TTMS program. On the one side,  
46  
47 439 our study showed that heavy workload with multiple BPHS programs could led to hardship to  
48  
49  
50 440 deliver standard TTMS to TB patients. On the other side, we found that inadequate  
51  
52  
53 441 professional capability, especially village doctors, could led to patients' distrusts and hence  
54  
55 442 impeded TTMS delivery. Simultaneously, our study disclosed that PHC sectors lack of  
56  
57 443 adequate TB training for HCWs, particularly training related to communicational and  
58  
59  
60

1  
2  
3  
4  
5 444 professional knowledge for TTMS delivery resulted in substandard TTMS. Other studies  
6  
7  
8 445 proved the on-the-job training is important to improve professional skills among HCWs [33,  
9  
10 446 44, 46, 47], especially trainings emphasized both knowledge and practice [48]. Furthermore,  
11  
12  
13 447 we found that the performance assessment for HCWs in TTMS program may exist  
14  
15  
16 448 irrationality regarding their heavy workload which led to hardship to deliver standard TTMS  
17  
18 449 and hindered their working enthusiastic.

20  
21 450 In addition, our results showed that PHC sectors lack of sufficient funding for TTMS  
22  
23  
24 451 program, and most HCWs unsatisfied with low salary, allowance or subsidy which was  
25  
26 452 consistent with other study [30]. Many research also indicated that the diverse issues of  
27  
28  
29 453 financial incentives combined with heavy workload could influence HCW's motivation and  
30  
31 454 performance [44, 49-52]. The appropriate use of incentives for HCWs is a means of  
32  
33  
34 455 promoting health outcomes with a direct impact on the effectiveness and sustainability of a  
35  
36 456 health program, and also able to improve services delivery through enhancing motivation and  
37  
38  
39 457 reducing attrition [48]. Notably, we found that HCWs faced out-of-pocket expenditure for  
40  
41  
42 458 transportations and telephone charges for TTMS delivery which could further impact their  
43  
44  
45 459 work enthusiastic.

46  
47 460 Our results also identified barriers at patient level to TTMS delivery included their  
48  
49  
50 461 susceptible socioeconomic characteristics (aging, low education, migrant, and poor financial  
51  
52 462 status) and lower literacy related to TB control. Previous nationwide TB epidemiology  
53  
54  
55 463 survey in China revealed that near half (48.8%) of the TB patients were aged  $\geq 60$ , less  
56  
57 464 educated, and over 80% of TB patients had household incomes below local levels [18]. Our  
58  
59  
60

1  
2  
3  
4  
5 465 results indicated that poor socioeconomic characteristics and low TB-related health literacy  
6  
7  
8 466 together highly impeded TTMS delivery. As patients with low socioeconomic features were  
9  
10  
11 467 often found with lower education background, poor health literacy, and more likely to be  
12  
13 468 have nonadherence, hence, they were more likely to refuse to HCWs' supervision, which is  
14  
15  
16 469 consistent with other studies [18, 53, 54]. In addition, we found that TTMS delivery among  
17  
18 470 migrant patients was challenging for HCWs due to hard to reach. Other studies also reported  
19  
20  
21 471 that migrant patients with frequently movement and low socioeconomic status had relatively  
22  
23  
24 472 poorer TB-related awareness [55-57] which could future hindered TB case management.  
25  
26 473 Previous studies revealed that West China had a higher proportion of rural mountain areas as  
27  
28  
29 474 well as domestic migrants compared with other regions in China, and TB-related awareness  
30  
31  
32 475 among rural, less educated, and migrants was particularly serious [18, 55, 57-59].

33  
34 476 Our study also discovered that the health insurance cannot cover all medicines and tests  
35  
36  
37 477 related to side-effects which accentuated financial burden among poor TB patients and led to  
38  
39  
40 478 hardship for TTMS delivery. In order to relief barriers from TB patients, on the one hand,  
41  
42  
43 479 addressing financial burden due to TB treatment among poor patients is crucial.  
44  
45  
46 480 Notwithstanding, previous national TB epidemiology survey in China reported that over 90%  
47  
48  
49 481 of TB patients had medical insurance combined with the policy of free TB diagnosis and  
50  
51  
52 482 treatment, the proportion of out-of-pocket among patients was still around 75.0%-84.2% [18].  
53  
54  
55 483 Studies and reports mentioned the necessary to increase reimbursement ratio and amount for  
56  
57  
58 484 TB treatment, to expand the scope of current free TB treatment policy, and to strengthen care  
59  
60 485 and assistance for TB patients [2, 6, 36, 60]. Particularly need to target DR-TB and

1  
2  
3  
4  
5 486 impoverished patients with transportation, accommodation and nutrition allowance during  
6  
7  
8 487 TTMS delivery to promote TB control outcomes.  
9

10 488 On the other hand, promoting TB-related health literacy among patients and enhancing  
11  
12  
13 489 TB-related awareness among the public are urgently necessary. As our study revealed that  
14  
15  
16 490 not only poor TB health literacy is a barrier from patients, TB-related social stigma also  
17  
18  
19 491 impeded TTMS delivery especially in urban areas. Previous studies suggested to provide  
20  
21 492 easily understandable TB health education to particular target population (the aged, less  
22  
23  
24 493 educated, close contacts, etc.) with certain modes of health education [18, 58]. Other study  
25  
26 494 indicated that a combination of mass media approaches and interpersonal communications  
27  
28  
29 495 between patients and HCWs could lead to more effective TB control [59]. Similarly, Chinese  
30  
31 496 Action Plan to Stop TB called for various publicity activities to raise awareness of TB which  
32  
33  
34 497 includes traditional media such as television broadcasting and newspaper, and also the use of  
35  
36  
37 498 new media such as WeChat applet to promote dissemination of scientific TB knowledge and  
38  
39 499 eliminate social discrimination [2].  
40

#### 41 ***Strengthens and limitations*** 42

43  
44 501 Our study used a mixed research method combining quantitative research (questionnaire  
45  
46  
47 502 survey) with qualitative research (semi-structured, open-ended in-depth interviews) to assess  
48  
49  
50 503 TTMS program delivery by HCWs in PHC sectors. Perspectives from organizations and  
51  
52 504 patients were both included by using the PRISM model to evaluate specific barriers to TTMS  
53  
54  
55 505 delivery. Three levels of the local health organization were all involved in our study, which  
56  
57 506 contained the HCWs as the frontline staffs, the CDC leaders as the managers, and the Health  
58  
59  
60

1  
2  
3  
4  
5 507 Commission leaders as the policy makers. However, there are a number of limitations in the  
6  
7  
8 508 current study. First, the sample size of both questionnaire survey and in-depth interviews  
9  
10  
11 509 could be further expanded to enhance the representativeness of study. Second, as we only  
12  
13 510 explore the status of and barriers to TTMS delivery by HCWs in PHC sectors,  
14  
15  
16 511 well-evidenced implementation strategies that able to solve current problems successfully  
17  
18 512 were not able to be provided in this study. Further studies are required to provide more  
19  
20  
21 513 evidence for producing more comprehensive and effective TB control strategies.  
22

## 23 514 **Conclusion**

25  
26 515 All the engagements of HCWs in TTMS program suggests that the government realized the  
27  
28  
29 516 importance of HCWs in PHC sectors in promoting TB patients treatment adherence and  
30  
31  
32 517 outcomes and underscored their integration into the TB control model. We identified barriers  
33  
34 518 operating in organizational level (cross-sectional coordination, patient-centered approach,  
35  
36  
37 519 resources and incentives, training support, reimbursement issue, and performance  
38  
39 520 assessment) and patient level (socioeconomic characteristics, health literacy and social  
40  
41  
42 521 stigma) to TTMS delivery by HCWs in PHC sectors. There is an urgent need to identify  
43  
44  
45 522 comprehensive measures to effectively overcome barriers to TTMS delivery and further  
46  
47 523 promote TB control in Southwest China.

48  
49 524 **Acknowledgements** We would like to thank the participants who responded our  
50  
51 525 questionnaires. We also thank all leaders and healthcare workers in the PHCs in study places  
52  
53 526 who supported this study by facilitating implementation of the field questionnaire survey and  
54  
55 527 participated in our interviews.

56  
57 528 **Contributions** JZ, JP and YL have designed this survey, JZ, JP, GW, WX, TZ, SL and QW  
58  
59  
60

1  
2  
3  
4  
5 529 have collected data, JZ, JP, RZ, YC and JL have managed and analyzed data, YL and DH  
6  
7 530 have controlled the quality of data collection and analysis, JZ has drafted the manuscript. YL  
8  
9 531 has edited the manuscript. All authors have interpreted the results, revised the report and  
10  
11 532 completed the final version. The author(s) read and approved the final manuscript.

12  
13 533 **Funding** The study was funded by the National Natural Science Foundation of China  
14  
15 534 (No.81773489), the Chongqing outstanding youth project (No.cstc2020jcyj-jq0035), Social  
16  
17 535 Science and Technology Innovation Subject in Chongqing (No.cstc2015shmszx120070).

18  
19 536 **Disclaimer** The funders had no role in study design, data collection and analysis,  
20  
21 537 interpretation of the data, writing the paper and the decision to submit the paper for  
22  
23 538 publication.

24  
25 539 **Competing interests** Not declared

26  
27 540 **Patient consent** Obtained.

28  
29 541 **Ethics approval** Ethics approval was obtained from the Institutional Review Board of Army  
30  
31 542 Medical University (Third Military Medical University), Chongqing, China  
32  
33 543 (No.AF/SC-08/1.0) before starting the study. This study was conducted in accordance with  
34  
35 544 the Declaration of Helsinki. A full explanation of the purpose and procedure of the study was  
36  
37 545 provided to participants prior to obtain their written informed consent. All demographic data  
38  
39 546 and quotes used in this study were deidentified to maintain the anonymity of participants.

40  
41 547 **Provenance and peer review** Not commissioned; externally peer reviewed.

42  
43 548 **Data availability statement** Data are available upon reasonable request.

44  
45 549 **Supplemental material** This content has been supplied by the author(s). It has not been  
46  
47 550 vetted by BMJ Publishing Group Limited (BMJ) and may not have been peer-reviewed. Any  
48  
49 551 opinions or recommendations discussed are solely those of the author(s) and are not endorsed  
50  
51 552 by BMJ. BMJ disclaims all liability and responsibility arising from any reliance placed on the  
52  
53 553 content. Where the content includes any translated material, BMJ does not warrant the  
54  
55 554 accuracy and reliability of the translations (including but not limited to local regulations,  
56  
57 555 clinical guidelines, terminology, drug names and drug dosages), and is not responsible for  
58  
59 556 any error and/or omissions arising from translation and adaptation or otherwise.  
60



1  
2  
3  
4  
5 557 **Open access** This is an open access article distributed in accordance with the Creative  
6  
7 558 Commons Attribution Non Commercial (CC BY-NC 4.0) license, which permits others to  
8  
9 559 distribute, remix, adapt, build upon this work non-commercially, and license their derivative  
10  
11 560 works on different terms, provided the original work is properly cited, appropriate credit is  
12  
13 561 given, any changes made indicated, and the use is non-commercial.  
14  
15 562 See: <http://creativecommons.org/licenses/by-nc/4.0/>.

16  
17 563 **References:**

- 18 564 [1]. World Health Organization. Global tuberculosis report 2021. Geneva: World Health Organization;  
19 565 2021. Licence: CC BY-NC-SA 3.0 IGO
- 20 566 [2]. National Health Commission. Stop TB Action Plan (2019-2022). 2019. Available:  
21 567 <http://www.nhc.gov.cn/jkj/s3589/201906/b30ae2842c5e4c9ea2f9d5557ad4b95f.shtml>.  
22 568 [Accessed 11 Feb 2022].
- 23 569 [3]. Li T, Du X, Liu X, Li Y, Zhao Y. Implementation Performance of Tuberculosis Control in China:  
24 570 2011-2020. *China CDC Wkly*. 2021 Mar 19;3(12):252-255.
- 25 571 [4]. World Health Organization: Treatment of tuberculosis: Guidelines for national programmes  
26 572 (4<sup>th</sup> edition), 2010. Available:  
27 573 [https://www.ncbi.nlm.nih.gov/books/NBK138748/pdf/Bookshelf\\_NBK138748.pdf](https://www.ncbi.nlm.nih.gov/books/NBK138748/pdf/Bookshelf_NBK138748.pdf). [Accessed  
28 574 11 Feb 2022].
- 29 575 [5]. Ministry of Health of the People's Republic of China. National tuberculosis control programme  
30 576 (2011-2015). 2011. National Health Commission. Stop TB Action Plan (2019-2022). 2019.  
31 577 Available: [http://www.gov.cn/gongbao/content/2011/content\\_2020914.htm](http://www.gov.cn/gongbao/content/2011/content_2020914.htm). [Accessed 11 Feb  
32 578 2022].
- 33 579 [6]. General Office of the State Council of the People's Republic of China. The 13th five-year plan for  
34 580 the prevention and control of tuberculosis. 2017. Available:  
35 581 [http://www.gov.cn/zhengce/content/2017-02/16/content\\_5168491.htm](http://www.gov.cn/zhengce/content/2017-02/16/content_5168491.htm). [Accessed 11 Feb 2022].
- 36 582 [7]. National Health Commission of the People's Republic of China. National basic public health  
37 583 service standard (3rd edition). 2017.  
38 584 Available: <http://www.nhc.gov.cn/jws/s3578/201703/d20c37e23e1f4c7db7b8e25f34473e1b.shtml>  
39 585 l. [Accessed 11 Feb 2022].
- 40 586 [8]. Chen YF. Discussion on the effect of the integrated tuberculosis prevention and control model in  
41 587 Dongxiang County. *Foreign Medical science section of medgeograpy*, 2014; 35 (3).
- 42 588 [9]. Chen XJ, Feng ZC. Analysis of the implementation effect of the integrated tuberculosis prevention  
43 589 and control model in Wuhan. *Medicine and society*. 2014;27(2):62-4.
- 44 590 [10]. Wu XD. The impact of community supervisors' supervision and management visits on the rate  
45 591 and curative effect of non-hospital pulmonary tuberculosis patients. *World Latest Medicine*

- 1  
2  
3  
4  
5 592 *Information*. 2018;18(90):210.
- 6 593 [11]. Zhang SN, Yuan ZA, Mei J, et al. The effectiveness of the new TB control network in Shanghai.  
7 594 *Chin J Antituberc*. 2007;29(1):74–7.
- 8 595 [12]. Wang XY. Evaluation on effectiveness of the new trinity TB control network in Wujin District  
9 596 of Changzhou. *Jiangsu J Prev Med*. 2013;24(5):18–20.
- 10 597 [13]. Jing GQ, Qian QW, Ding TD. The effects of tuberculosis prevention and control using the  
11 598 integrated mode in Bengbu. *Anhui J Prev Med*. 2012;18(6): 425–6.
- 12 599 [14]. Xie MF, Lai SF, Lian ST. Analysis on the effect of integrated tuberculosis control mode,  
13 600 Wuping county. *Prev Med Trib*. 2018;24(1):76–8
- 14 601 [15]. Pu J, Chen W, Jiang WX, et al. Is tuberculosis patients management improved in the integrated  
15 602 TB control model in West China? A survey in Guizhou Province, China. *Infect Dis Poverty*.  
16 603 2019 Jul 2;8(1):55.
- 17 604 [16]. Li Y, Ehiri J, Oren E, et al. Are we doing enough to stem the tide of acquired MDR-TB in  
18 605 countries with high TB burden? Results of a mixed method study in Chongqing, China. *PLoS*  
19 606 *One*. 2014 Feb 5; 9 (2):e88330.
- 20 607 [17]. Fetters MD, Curry LA, Creswell JW. Achieving integration in mixed methods designs-principles  
21 608 and practices. *Health Serv Res*. 2013;48:2134 – 56.
- 22 609 [18]. Yu Wang. The fifth national tuberculosis epidemiological sampling survey. *Beijing: Military*  
23 610 *Medical Science Press*. 2011.10
- 24 611 [19]. Chongqing Statistics Bureau. Chongqing Statistical Yearbook 2021. (2021). Available:  
25 612 <http://tjj.cq.gov.cn/cqtjj2021/indexch.htm>. [Accessed 11 Feb 2022].
- 26 613 [20]. Q Wang, T Li, X Du, et al. Analysis in the incidence of national tuberculosis reports from  
27 614 2015-2019. *Chinese Journal of Antituberculosis*. 2021; 43(02):107-112.
- 28 615 [21]. Guizhou Statistics Bureau. Guizhou Statistical Yearbook 2021. (2021). Available:  
29 616 <http://hgk.guizhou.gov.cn/publish/tj/2021/zk/indexch.ht>. [Accessed 11 Feb 2022].
- 30 617 [22]. National Bureau of Statistics. China Statistical Year book: China Statistics Press. 2018.  
31 618 Available: <http://www.stats.gov.cn/tjsj/ndsj/2018/indexch.htm>. [Accessed 11 Feb 2022].
- 32 619 [23]. Bolarinwa OA. Sample size estimation for health and social science researchers: The principles  
33 620 and considerations for different study designs. *Niger Postgrad Med J*. 2020 Apr-Jun;27(2):67-75.
- 34 621 [24]. Saunders B, Sim J, Kingstone T, Baker S, Waterfield J, Bartlam B, et al. Saturation in  
35 622 qualitative research: exploring its conceptualization and operationalization. *Qual Quant*.  
36 623 2018;52(4):1893-1907.
- 37 624 [25]. Feldstein, A.C, R.E. Glasgow. A practical, robust implementation and sustainability model  
38 625 (PRISM) for integrating research findings into practice. *Jt Comm J Qual Patient Saf*. 2008; 34(4):  
39 626 p. 228-43.
- 40 627 [26]. Liles, E.G, et al. Implementation challenges and successes of a population-based colorectal  
41 628 cancer screening program: a qualitative study of stakeholder perspectives. *Implementation*

- 1  
2  
3  
4  
5 629 *Science*. 2015; 10(1).
- 6  
7 630 [27].Schneider, J.L, et al Stakeholder perspectives on implementing a universal Lynch syndrome  
8 631 screening program: a qualitative study of early barriers and facilitators. *Genetics in Medicine*.  
9 632 2016; 18(2): p. 152-161.
- 10  
11 633 [28].Smith J, Firth J. Qualitative data analysis: the framework approach. *Nurse Researcher*. 2011;  
12 634 18(2): 52–62.
- 13  
14 635 [29].Ward DJ, Furber C, Tierney S, Swallow V. Using Framework Analysis in nursing research: A  
15 636 worked example. *J Adv Nurs*. 2013; 69(11): 2423–31.
- 16  
17 637 [30].YY He, JL Li, W Chen, L Luo, Y Shang, JH Xu. Analysis on the implementation of basic public  
18 638 health tuberculosis service items in Guizhou Province. *Studies of Trace Elements and Health*.  
19 639 2020; 37(02):54-57.
- 20  
21 640 [31].Gaspar LMDS, Braga C, Albuquerque GDM, Silva MPN, Maruza M, Montarroyos UR, et al.  
22 641 Knowledge, attitudes and practices of community health agents regarding pulmonary  
23 642 tuberculosis in a capital city in northeastern Brazil. *Cien Saude Colet*. 2019;  
24 643 26;24(10):3815-3824.
- 25  
26 644 [32].Hui Z, Xiaoqiu L, Caihong X, Dongmei H, Xue L, Tao L, et al. Guiding Tuberculosis Control  
27 645 Through the Healthy China Initiative 2019–2030. *China CDC Weekly*. 2020, 2(49): 948-950.
- 28  
29 646 [33].Liu GH, Deng J, Chen W. Investigation on the status of needs on community doctors for  
30 647 tuberculosis management in Guizhou Province. *China Health Industry*. 2019;16(21):11-13.
- 31  
32 648 [34]. Pradipta IS, Idrus LR, Probandari A, Lestari BW, Diantini A, Alffenaar JC, Hak E. Barriers and  
33 649 strategies to successful tuberculosis treatment in a high-burden tuberculosis setting: a qualitative  
34 650 study from the patient's perspective. *BMC Public Health*. 2021 Oct 21;21(1):1903.
- 35  
36 651 [35].Xu L, Gai R, Wang X, Liu Z, Cheng J, Zhou C, Liu J, Zhang H, Li H, Tang W. Socio-economic  
37 652 factors affecting the success of tuberculosis treatment in six counties of Shandong Province  
38 653 China. *The International Journal of Tuberculosis and Lung Disease*. 2010;14(4):440–6.
- 39  
40 654 [36].Noé A, Ribeiro RM, Anselmo R, et al. Knowledge, attitudes and practices regarding tuberculosis  
41 655 care among health workers in Southern Mozambique. *BMC Pulm Med*. 2017 Jan 5;17(1):2.
- 42  
43 656 [37]. Chongqing tuberculosis dispensary. Implementation plan of the Chongqing Stop Tuberculosis  
44 657 Action (2019-2022). 2020. Available: <http://www.cqtb.org/html/zcfg/20/01/1121.html>.  
45 658 [Accessed 11 Feb 2022].
- 46  
47 659 [38].Zhang H, Liu JJ. The overview and prospect of tuberculosis control in China since the founding  
48 660 of the Peoples Republic of China. *Chin J Antituberc*. 2019; 41(9):913 – 6.
- 49  
50 661 [39].Liu X, Lewis JJ, Zhang H, et al. Effectiveness of Electronic Reminders to Improve Medication  
51 662 Adherence in Tuberculosis Patients: A Cluster-Randomised Trial. *PLoS Med*. 2015 Sep 15; 12  
52 663 (9):e1001876.
- 53  
54 664 [40]. Alipanah N, Jarlsberg L, Miller C, et al. Adherence interventions and outcomes of tuberculosis  
55 665 treatment: A systematic review and meta-analysis of trials and observational studies. *PLoS Med*.
- 56  
57  
58  
59  
60

1  
2  
3  
4  
5  
6  
7  
8  
9  
10  
11  
12  
13  
14  
15  
16  
17  
18  
19  
20  
21  
22  
23  
24  
25  
26  
27  
28  
29  
30  
31  
32  
33  
34  
35  
36  
37  
38  
39  
40  
41  
42  
43  
44  
45  
46  
47  
48  
49  
50  
51  
52  
53  
54  
55  
56  
57  
58  
59  
60

2018 Jul 3;15 (7):e1002595.

- [41].Nhavoto JA, Grönlund Å, Klein GO. Mobile health treatment support intervention for HIV and tuberculosis in Mozambique: Perspectives of patients and healthcare workers. *PLoS One*. 2017 Apr 18;12(4):e0176051.
- [42].Wang N, Zhang H, Zhou Y, et al. Using electronic medication monitoring to guide differential management of tuberculosis patients at the community level in China. *BMC Infect Dis*. 2019 Oct 15;19(1):844.
- [43].Huang et al. *Global Health Research and Policy*. 2018. (3):18. Available: <https://doi.org/10.1186/s41256-018-0072-0>. [Accessed 11 Feb 2022].
- [44].Tao T, Zhao Q, Jiang S, et al. Motivating health workers for the provision of directly observed treatment to TB patients in rural China: does cash incentive work? A qualitative study. *Int J Health Plann Manag*. 2013;28(4):e310–24.
- [45].Liang S, Deng H, Liu S, et al. Competency building for lay health workers is an intangible force driving basic public health services in Southwest China. *BMC Health Serv Res*. 2019 Aug 23;19(1):596.
- [46].Edwards NC, Roelofs SM. Sustainability: The elusive dimension of international health projects. *Can J Public Health*. 2006;97:45–9. Available: <http://www.jstor.org/stable/41994677>. [Accessed 11 Feb 2022].
- [47].Li N, Yan LL, Niu W, et al. The effects of a community-based sodium reduction program in rural China—a clusterrandomized trial. *PLoS One*. 2016;11(12):e0166620..
- [48].World Health Organization. WHO guideline on health policy and system support to optimize healyhcare worker programmes. Geneva: World Health Organization. 2018.
- [49].Campbell C, Scott K. Retreat from Alma Ata? The WHO's report on task shifting to healyhcare workers for AIDS care in poor countries. *Glob Public Health*. 2011;6 (2):125–38.
- [50].Jaskiewicz W, Tulenko K. Increasing healyhcare worker productivity and effectiveness: a review of the influence of the work environment. *Hum Resour Health*. 2012; 10 (1):1.
- [51].Hemminki E, Long Q, Zhang W-H, et al. Impact of financial and educational interventions on maternity care: results of cluster randomized trials in rural China, CHIMACA. *Matern Child Health J*. 2013; 17 (2):208–21.
- [52].Meng Q, Li R, Cheng G, et al. Provision and financial burden of TB services in a financially decentralized system: a case study from Shandong, China. *Int J Health Plann Manag*. 2004;19(S1):S45–62.
- [53].Hutchison C, Khan MS, Yoong J, et al. Financial barriers and coping strategies: a qualitative study of accessing multidrug-resistant tuberculosis and tuberculosis care in Yunnan, China. *BMC Public Health*. 2017 Feb 22;17(1):221.
- [54].Onah CK, Azuogu BN, Ossai EN, et al. Addressing constraints to informal providers' involvement in tuberculosis control: a qualitative study of patent medicine dealers and

- 1  
2  
3  
4  
5 703 tuberculosis programme managers. *Glob Health Res Policy*. 2021 Nov 8;6(1):43.
- 6 704 [55]. Wang SN, Deng YH, Shi YY, et al. Investigation on knowledge of tuberculosis prevention and  
7 705 treatment among floating population tuberculosis patients in Putuo District, Shanghai. *Health*  
8 706 *Education and Promotion*.2020,15(06):636-638.
- 9 707 [56].Ma Y, Liu YH, Du J, et al. Survey on awareness of core information of tuberculosis prevention  
10 708 and control knowledge in pulmonary tuberculosis patients. *Chinese Anti-tuberculosis Journal*.  
11 709 2015 (10).
- 12 710 [57].Zou X, Zhou L, Wu H, et al. The role of tuberculosis control institutes in delivering tuberculosis  
13 711 information to domestic migrants in China: A multi-level analysis of a nationwide  
14 712 cross-sectional survey. *Int J Infect Dis*. 2019; 86:94-101.
- 15 713 [58].Chen W, Li Y, Yang H, et al. Is tuberculosis health education reaching the public in China? A  
16 714 cross-sectional survey in Guizhou Province. *BMJ Open*. 2016; 6(9):e013534.
- 17 715 [59].Arulchelvan S, Elangovan R. Effective communication approaches in tuberculosis control:  
18 716 Health workers' perceptions and experiences. *Indian J Tuberc*. 2017;64(4):318-322.
- 19 717 [60]. Rawal LB, Kanda K, Biswas T, et al. Health problems and utilization of health services among  
20 718 Forcibly Displaced Myanmar Nationals in Bangladesh. *Glob Health Res Policy*. 2021 Oct  
21 719 11;6(1):39.
- 22 720  
23 721

## 722 **Figure legends**

723 **Figure 1** Adapted PRISM for barriers on TTMS delivery in PHC sectors. This figure presents  
724 the four core domains of the Practical Robust Implementation and Sustainability Model  
725 (PRISM) for barriers on TTMS delivery in PHC sectors, including: 1) TTMS program  
726 design; 2) the recipients, 3) the external environment, and 4) the implementation and  
727 sustainability infrastructure. Activated elements for each domains were presented in boxes.  
728 Notes: *TTMS* refers to tuberculosis treatment management service; *PHC* refers to primary  
729 healthcare; *HCW* refers to healthcare worker).

730

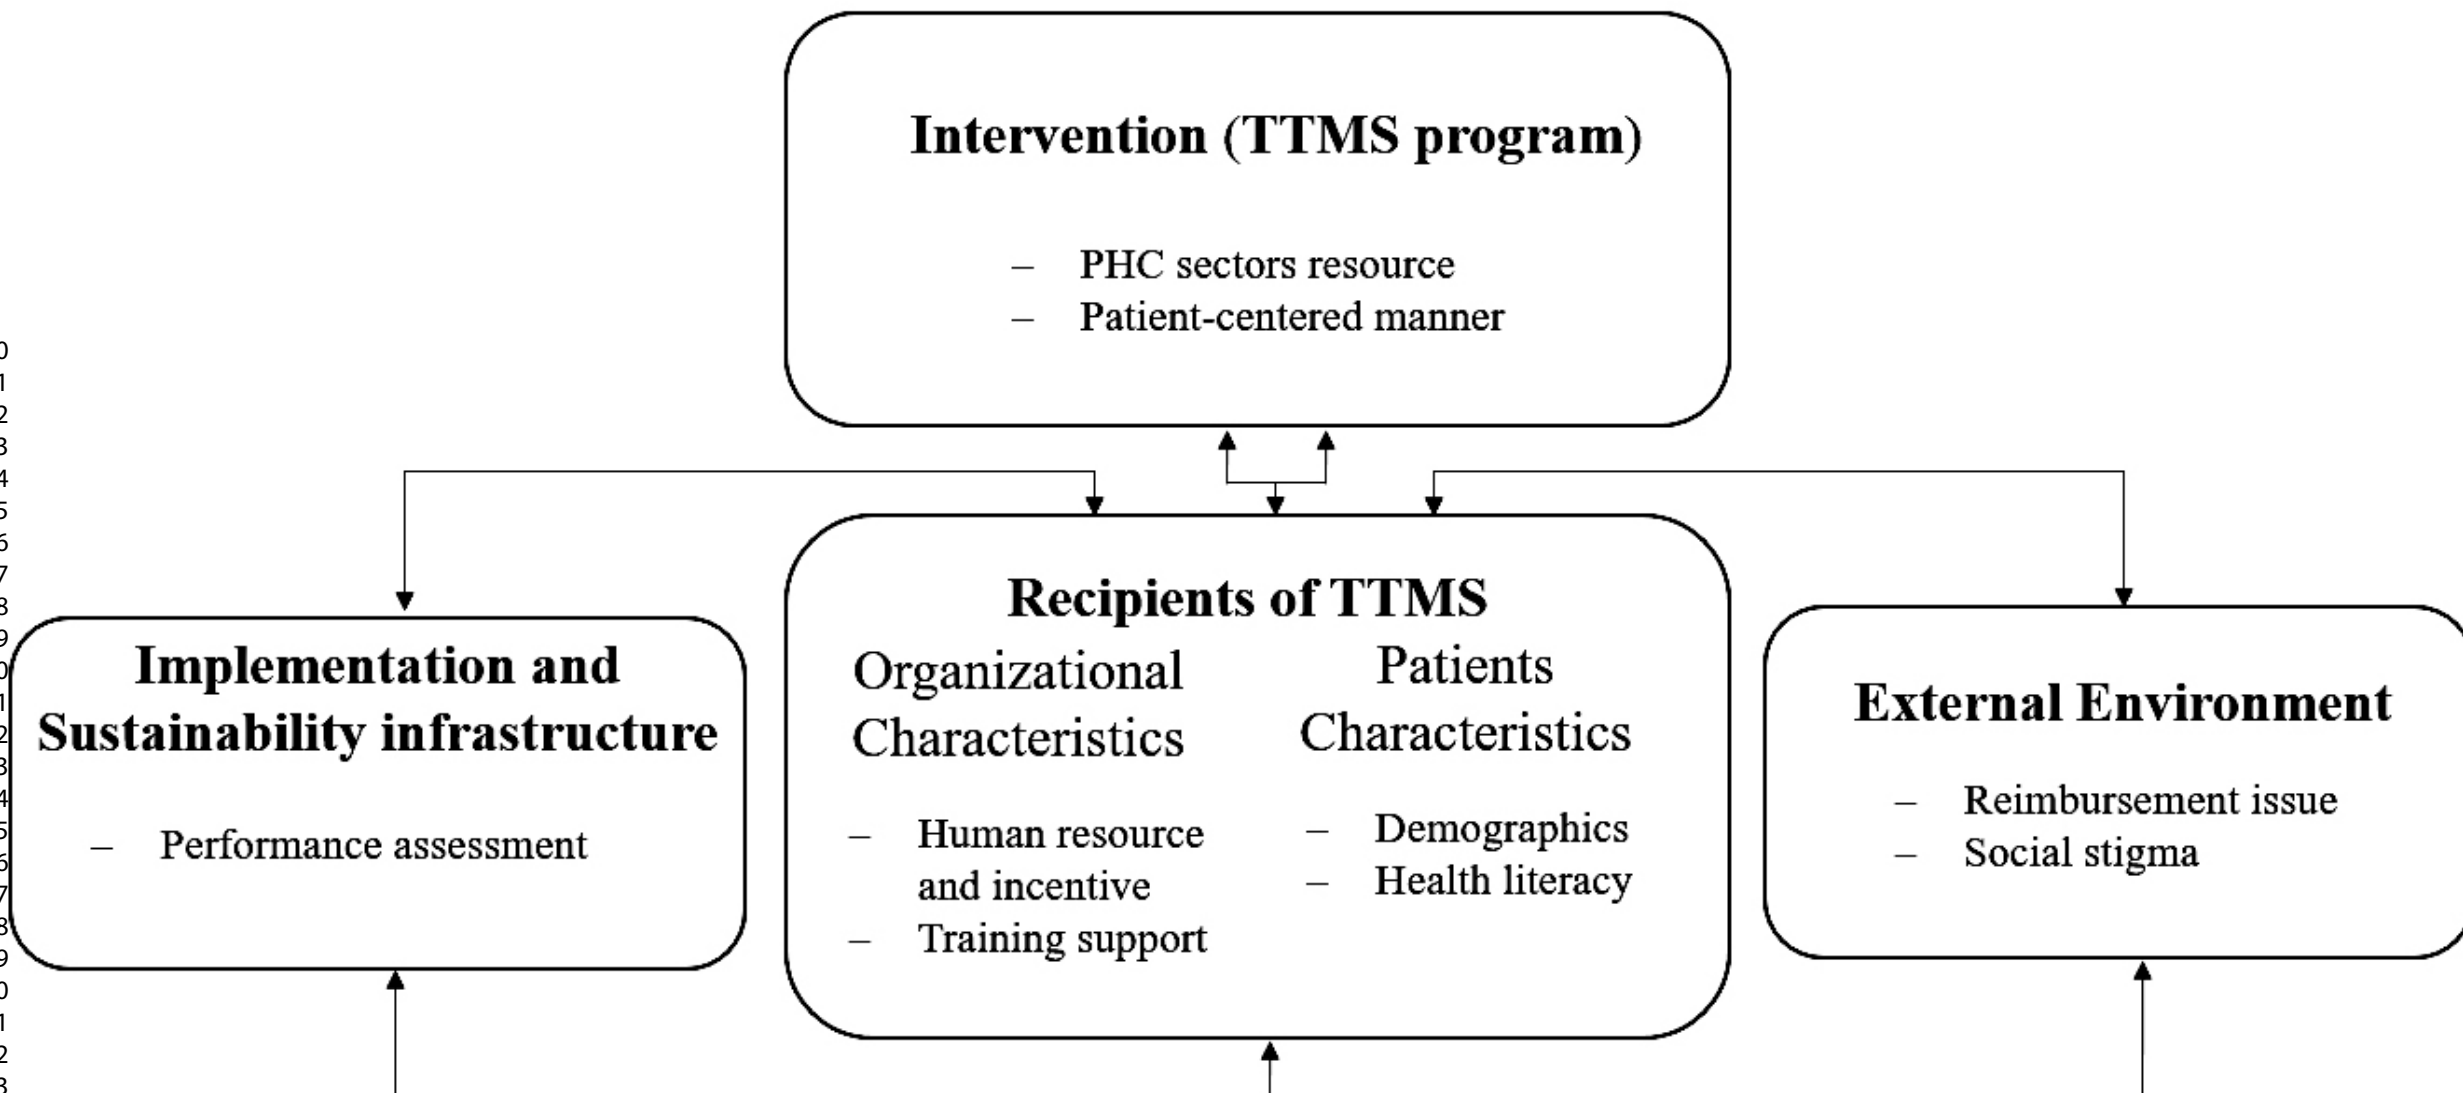

Figure 1: Adapted PRISM for barriers on TTMS delivery in PHC sectors

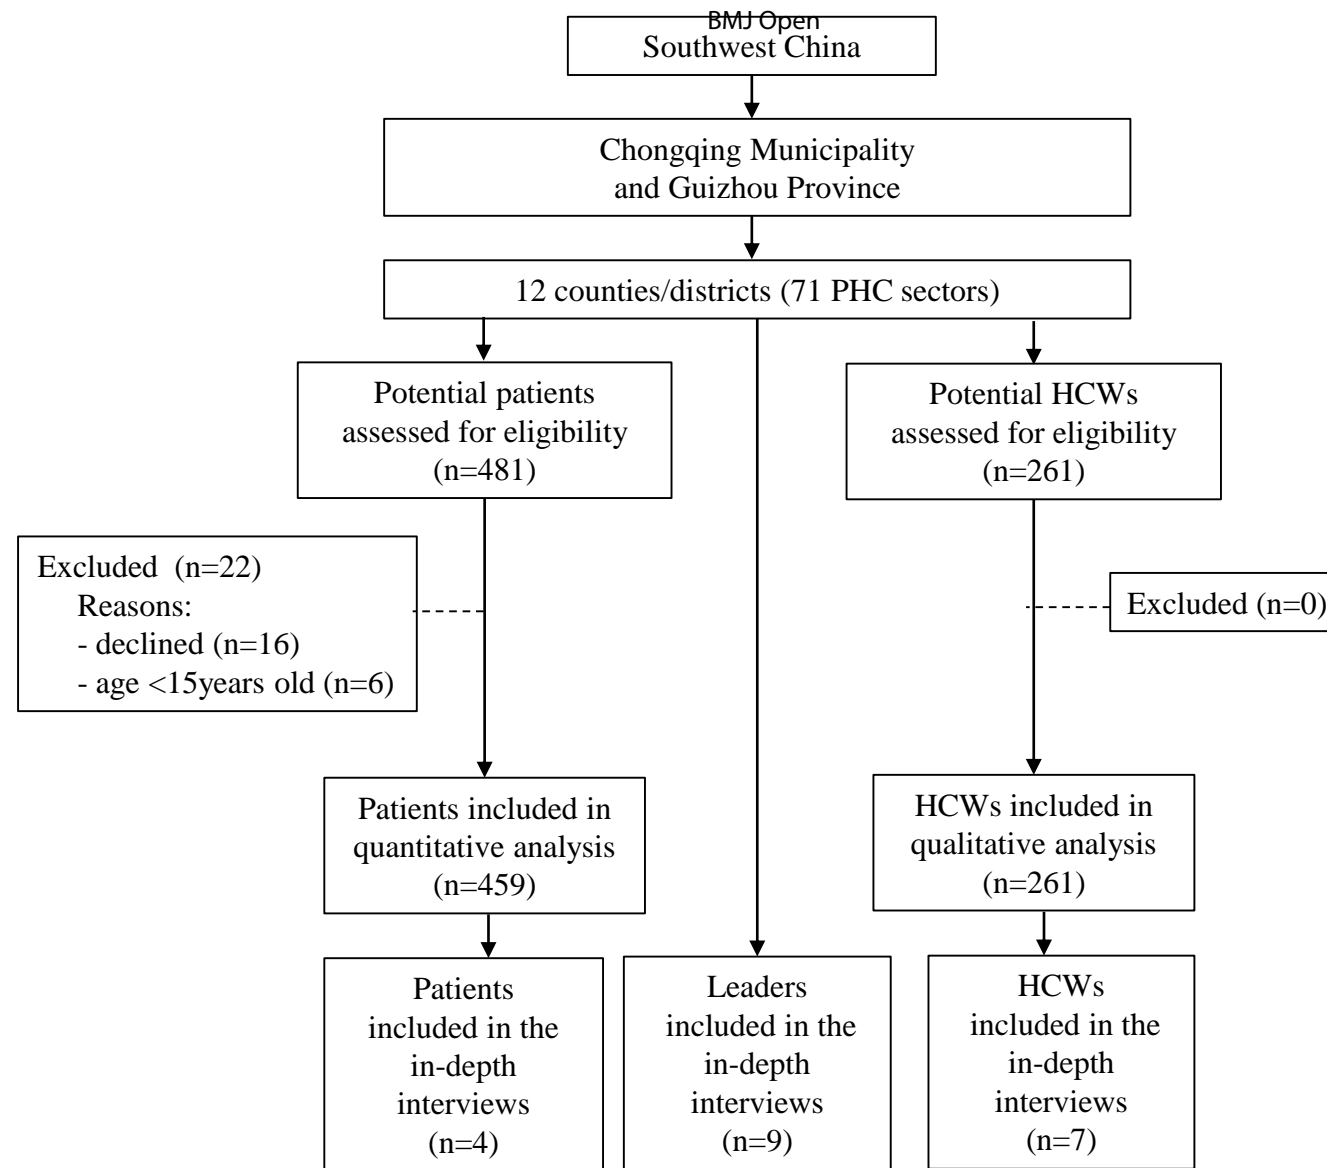

**Figure:** the flow diagram of the participant recruitment



## Appendix 1: Chi-square test results

## Factors associated with TTMS with lower delivery rate

| Variable                                                | Patients' peer supervision establish (n=235) |        | Train patient to use smart tools to assist TTMS (n=236) |        | Intensive phase DOT (n=236) |        | Continuation phase DOT (n=236) |        | Regular medicine delivery (n=234) |        | Sputum sample collection (n=234) |        |
|---------------------------------------------------------|----------------------------------------------|--------|---------------------------------------------------------|--------|-----------------------------|--------|--------------------------------|--------|-----------------------------------|--------|----------------------------------|--------|
|                                                         | N(%)                                         | P(X2)  | N(%)                                                    | P(X2)  | N(%)                        | P(X2)  | N(%)                           | P(X2)  | N(%)                              | P(X2)  | N(%)                             | P(X2)  |
| <b>Gender</b>                                           |                                              | 0.025* |                                                         | 0.429  |                             | 0.370  |                                | 0.867  |                                   | 0.033* |                                  | 0.760  |
| Female                                                  | 115(74.7)                                    |        | 88(57.1)                                                |        | 81(52.6)                    |        | 81(52.6)                       |        | 97(63.8)                          |        | 68(44.2)                         |        |
| Male                                                    | 69(87.3)                                     |        | 50(62.5)                                                |        | 47(58.8)                    |        | 43(53.8)                       |        | 62(77.5)                          |        | 37(46.3)                         |        |
| <b>Age</b>                                              |                                              | 0.23   |                                                         | 0.496  |                             | 0.023* |                                | 0.478  |                                   | 0.261  |                                  | 0.950  |
| 20-29                                                   | 73(83.9)                                     |        | 47(53.4)                                                |        | 55(61.8)                    |        | 51(57.3)                       |        | 63(70.8)                          |        | 40(44.9)                         |        |
| 30-39                                                   | 60(78.9)                                     |        | 46(60.5)                                                |        | 37(49.3)                    |        | 36(48.0)                       |        | 46(61.3)                          |        | 31(41.9)                         |        |
| 40-50                                                   | 33(68.8)                                     |        | 28(58.3)                                                |        | 19(43.2)                    |        | 24(50.0)                       |        | 35(74.5)                          |        | 22(44.9)                         |        |
| >50                                                     | 9(75.0)                                      |        | 9(75.0)                                                 |        | 13(81.3)                    |        | 8(66.7)                        |        | 10(83.3)                          |        | 6(50.0)                          |        |
| <b>Education</b>                                        |                                              | 0.927  |                                                         | 0.607  |                             | 0.123  |                                | 0.247  |                                   | 0.815  |                                  | 0.139  |
| Technical secondary school and below                    | 40(76.9)                                     |        | 33(64.7)                                                |        | 27(51.9)                    |        | 25(48.1)                       |        | 36(70.6)                          |        | 25(49.0)                         |        |
| College                                                 | 112(79.4)                                    |        | 81(57.0)                                                |        | 84(59.2)                    |        | 81(57.0)                       |        | 94(66.7)                          |        | 67(47.2)                         |        |
| University and above                                    | 32(78.0)                                     |        | 24(57.1)                                                |        | 17(41.5)                    |        | 18(43.9)                       |        | 29(70.7)                          |        | 13(31.0)                         |        |
| <b>Regions</b>                                          |                                              | 0.468  |                                                         | 0.323  |                             | 0.367  |                                | 0.399  |                                   | 0.360  |                                  | 0.820  |
| Relatively developed                                    | 54(77.1)                                     |        | 47(66.2)                                                |        | 37(53.6)                    |        | 38(55.1)                       |        | 46(67.6)                          |        | 32(45.1)                         |        |
| Medium developed                                        | 66(75.9)                                     |        | 48(55.2)                                                |        | 53(60.2)                    |        | 50(56.8)                       |        | 64(73.6)                          |        | 41(47.1)                         |        |
| Less developed                                          | 65(83.3)                                     |        | 44(65.4)                                                |        | 39(49.4)                    |        | 37(46.8)                       |        | 50(63.3)                          |        | 33(42.3)                         |        |
| <b>Primary Health Sector Type</b>                       |                                              | 0.044* |                                                         | 0.529  |                             | 0.574  |                                | 0.586  |                                   | 0.386  |                                  | 0.607  |
| Township health center                                  | 141(82.0)                                    |        | 104(60.1)                                               |        | 97(55.7)                    |        | 94(54.0)                       |        | 121(69.9)                         |        | 79(45.9)                         |        |
| Community health center                                 | 44(69.8)                                     |        | 35(55.6)                                                |        | 32(51.6)                    |        | 31(50.0)                       |        | 39(63.9)                          |        | 27(42.2)                         |        |
| <b>Professional Title</b>                               |                                              | 0.317  |                                                         | 0.591  |                             | 0.010* |                                | 0.036* |                                   | 0.801  |                                  | 0.019* |
| Non                                                     | 67(82.7)                                     |        | 46(56.8)                                                |        | 37(45.7)                    |        | 36(44.4)                       |        | 52(64.2)                          |        | 30(37.0)                         |        |
| Junior                                                  | 82(78.8)                                     |        | 65(62.5)                                                |        | 70(66.7)                    |        | 67(63.8)                       |        | 73(70.2)                          |        | 58(55.8)                         |        |
| Intermediate                                            | 19(67.9)                                     |        | 15(53.6)                                                |        | 12(42.9)                    |        | 13(46.4)                       |        | 17(63.0)                          |        | 9(32.1)                          |        |
| Deputy senior                                           | 2(66.7)                                      |        | 1(33.3)                                                 |        | 2(66.7)                     |        | 2(66.7)                        |        | 2(66.7)                           |        | 1(33.3)                          |        |
| <b>Times of training received in the past six month</b> |                                              | 0.299  |                                                         | 0.007* |                             | 0.147  |                                | 0.214  |                                   | 0.963  |                                  | 0.022* |
| 0                                                       | 11(91.7)                                     |        | 10(83.3)                                                |        | 8(66.7)                     |        | 8(66.7)                        |        | 8(72.7)                           |        | 7(58.3)                          |        |
| 1                                                       | 37(78.7)                                     |        | 28(57.1)                                                |        | 22(44.9)                    |        | 21(42.9)                       |        | 34(69.4)                          |        | 20(41.7)                         |        |
| 2                                                       | 93(76.2)                                     |        | 68(56.2)                                                |        | 63(51.6)                    |        | 62(50.8)                       |        | 82(67.8)                          |        | 46(37.4)                         |        |
| 3                                                       | 31(88.6)                                     |        | 27(77.1)                                                |        | 23(67.6)                    |        | 22(64.7)                       |        | 22(64.7)                          |        | 23(67.6)                         |        |
| >3                                                      | 13(68.4)                                     |        | 6(31.6)                                                 |        | 13(68.4)                    |        | 12(63.2)                       |        | 14(73.7)                          |        | 10(52.6)                         |        |
| <b>Working satisfaction</b>                             |                                              | 0.000* |                                                         | 0.042* |                             | 0.016* |                                | 0.012* |                                   | 0.008* |                                  | 0.027* |
| Dissatisfied                                            | 32(68.1)                                     |        | 27(56.3)                                                |        | 20(43.5)                    |        | 20(43.5)                       |        | 30(66.7)                          |        | 19 (40.4)                        |        |
| General                                                 | 26(60.5)                                     |        | 20(45.5)                                                |        | 19(43.2)                    |        | 17(38.6)                       |        | 22(50.0)                          |        | 14 (31.8)                        |        |
| Satisfied                                               | 76(85.4)                                     |        | 51(57.3)                                                |        | 52(57.8)                    |        | 51(56.7)                       |        | 64(71.9)                          |        | 39 (43.8)                        |        |



Very satisfied 50(92.6) 39(73.6) 38(70.4) 37(68.5) 44(81.5) 33(61.1)

Note: \*p<0.05, TTMS refers to tuberculosis treatment management service, DOT refers to directly observed therapy, MDR-TB refers to multi-drug resistance tuberculosis, Lower delivery rate refers to a rate below 90%, DOT refers to directly observed therapy

**Factors associated with TTMS with lower delivery rate (Continue)**

| Variable                             | Providing food or transport assistances for poor TB patient (n=230) |       | Providing DOT for migrant TB patient at their convenient time (n=235) |       | Providing subsistence allowance or psychological support for migrant patient (n=236) |       | Providing injection treatment for MDR-TB patient (n=234) |       | Providing supervision for newly released prison patient (n=236) |       | Referring TB patient with mental/psychological problems or alcohol/drug addiction (n=235) |       | Training cured TB patients to provide peer education (n=237) |        | Establishing platform for TB patients communication (n=237) |       |
|--------------------------------------|---------------------------------------------------------------------|-------|-----------------------------------------------------------------------|-------|--------------------------------------------------------------------------------------|-------|----------------------------------------------------------|-------|-----------------------------------------------------------------|-------|-------------------------------------------------------------------------------------------|-------|--------------------------------------------------------------|--------|-------------------------------------------------------------|-------|
|                                      | N(%)                                                                | P(X2) | N(%)                                                                  | P(X2) | N(%)                                                                                 | P(X2) | N(%)                                                     | P(X2) | N(%)                                                            | P(X2) | N(%)                                                                                      | P(X2) | N(%)                                                         | P(X2)  | N(%)                                                        | P(X2) |
| <b>Gender</b>                        |                                                                     | 0.215 |                                                                       | 0.153 |                                                                                      | 0.313 |                                                          | 0.274 |                                                                 | 0.669 |                                                                                           | 0.431 |                                                              | 0.957  |                                                             | 0.845 |
| Female                               | 40(51.3)                                                            |       | 72(91.1)                                                              |       | 36(45.0)                                                                             |       | 37(46.3)                                                 |       | 46(57.5)                                                        |       | 59(74.7)                                                                                  |       | 70(87.5)                                                     |        | 47(58.8)                                                    |       |
| Male                                 | 64(42.7)                                                            |       | 130(84.4)                                                             |       | 80(51.9)                                                                             |       | 59(38.8)                                                 |       | 93(60.4)                                                        |       | 122(79.2)                                                                                 |       | 136(87.7)                                                    |        | 89(57.4)                                                    |       |
| <b>Age</b>                           |                                                                     | 0.174 |                                                                       | 0.573 |                                                                                      | 0.243 |                                                          | 0.561 |                                                                 | 0.408 |                                                                                           | 0.242 |                                                              | 0.016* |                                                             | 0.783 |
| <30                                  | 43(49.4)                                                            |       | 74(83.1)                                                              |       | 50(56.8)                                                                             |       | 37(42.5)                                                 |       | 57(64.0)                                                        |       | 71(79.8)                                                                                  |       | 84(94.4)                                                     |        | 55(61.8)                                                    |       |
| 30-39                                | 26(35.1)                                                            |       | 65(86.7)                                                              |       | 32(42.1)                                                                             |       | 26(34.2)                                                 |       | 40(52.6)                                                        |       | 56(73.7)                                                                                  |       | 61(80.3)                                                     |        | 42(55.3)                                                    |       |
| 40-50                                | 25(53.2)                                                            |       | 44(91.7)                                                              |       | 22(45.8)                                                                             |       | 21(43.8)                                                 |       | 26(54.2)                                                        |       | 39(83.0)                                                                                  |       | 44(91.7)                                                     |        | 28(58.3)                                                    |       |
| >50                                  | 6(50.0)                                                             |       | 10(83.3)                                                              |       | 7(58.3)                                                                              |       | 6(50.0)                                                  |       | 8(66.7)                                                         |       | 7(58.3)                                                                                   |       | 9(75.0)                                                      |        | 6(50.0)                                                     |       |
| <b>Education</b>                     |                                                                     | 0.847 |                                                                       | 0.526 |                                                                                      | 0.352 |                                                          | 0.198 |                                                                 | 0.073 |                                                                                           | 0.189 |                                                              | 0.136  |                                                             | 0.194 |
| Technical secondary school and below | 22(44.0)                                                            |       | 45(88.2)                                                              |       | 23(44.2)                                                                             |       | 23(45.1)                                                 |       | 35(68.6)                                                        |       | 43(84.3)                                                                                  |       | 47(90.4)                                                     |        | 32(61.5)                                                    |       |
| College                              | 64(46.4)                                                            |       | 123(87.2)                                                             |       | 75(53.2)                                                                             |       | 60(42.9)                                                 |       | 84(59.2)                                                        |       | 110(77.5)                                                                                 |       | 127(89.4)                                                    |        | 85(59.9)                                                    |       |
| University and above                 | 17(41.5)                                                            |       | 34(81.0)                                                              |       | 18(42.9)                                                                             |       | 12(28.6)                                                 |       | 19(45.2)                                                        |       | 28(68.3)                                                                                  |       | 33(78.6)                                                     |        | 19(45.2)                                                    |       |
| <b>Regions</b>                       |                                                                     | 0.277 |                                                                       | 0.327 |                                                                                      | 0.104 |                                                          | 0.613 |                                                                 | 0.299 |                                                                                           | 0.343 |                                                              | 0.048  |                                                             | 0.737 |
| Relatively developed                 | 28(40.6)                                                            |       | 63(90.0)                                                              |       | 36(50.7)                                                                             |       | 31(44.3)                                                 |       | 44(62.9)                                                        |       | 56(80.0)                                                                                  |       | 57(80.3)                                                     |        | 39(54.9)                                                    |       |
| Medium developed                     | 36(42.4)                                                            |       | 77(87.5)                                                              |       | 49(57.0)                                                                             |       | 36(42.4)                                                 |       | 54(62.1)                                                        |       | 70(80.5)                                                                                  |       | 81(93.1)                                                     |        | 53(60.9)                                                    |       |
| Less developed                       | 40(52.6)                                                            |       | 63(81.8)                                                              |       | 32(40.5)                                                                             |       | 29(36.7)                                                 |       | 41(51.9)                                                        |       | 56(71.8)                                                                                  |       | 70(88.6)                                                     |        | 45(57.0)                                                    |       |

|                                                         |          | 0.885     | 0.498    | 0.613    | 0.394     | 0.127     | 0.528     | 0.157     | 0.768 |
|---------------------------------------------------------|----------|-----------|----------|----------|-----------|-----------|-----------|-----------|-------|
| <b>Primary Health Sector Type</b>                       |          |           |          |          |           |           |           |           |       |
| 2 Township health center                                | 76(45.5) | 147(85.5) | 87(50.6) | 73(42.7) | 107(61.8) | 135(78.5) | 115(89.6) | 101(58.4) |       |
| 4 Community health center                               | 28(44.4) | 56(88.9)  | 30(46.9) | 23(36.5) | 32(50.8)  | 47(74.6)  | 53(82.8)  | 36(56.3)  |       |
| <b>Professional Title</b>                               |          | 0.438     | 0.327    | 0.038*   | 0.004*    | 0.043*    | 0.870     | 0.683     | 0.789 |
| 6 Non                                                   | 35(43.8) | 67(82.7)  | 44(62.0) | 23(28.4) | 47(58.0)  | 61(76.3)  | 71(87.7)  | 43(53.1)  |       |
| 7 Junior                                                | 50(50.0) | 92(89.3)  | 26(47.3) | 55(53.4) | 68(64.8)  | 80(76.2)  | 94(88.7)  | 64(60.4)  |       |
| 8 Intermediate                                          | 9(33.3)  | 22(78.6)  | 16(53.3) | 9(33.3)  | 10(37.0)  | 22(81.5)  | 22(81.5)  | 16(59.3)  |       |
| 9 Deputy senior                                         | 1(33.3)  | 3(100.0)  | 31(38.8) | 1(33.3)  | 1(33.3)   | 2(66.7)   | 3(100.0)  | 2(66.7)   |       |
| <b>Times of training received in the past six month</b> |          | 0.256     | 0.579    | 0.497    | 0.001*    | 0.022*    | 0.140     | 0.788     | 0.099 |
| 13 0                                                    | 6(54.5)  | 9(81.8)   | 7(58.3)  | 6(54.5)  | 8(72.7)   | 11(100.0) | 10(83.3)  | 6(50.0)   |       |
| 14 1                                                    | 21(43.8) | 41(83.7)  | 23(46.9) | 15(3.5)  | 22(44.9)  | 36(73.5)  | 42(85.7)  | 30(61.2)  |       |
| 15 2                                                    | 46(39.3) | 103(85.1) | 55(45.5) | 42(35.0) | 70(57.4)  | 90(74.4)  | 106(86.9) | 63(51.6)  |       |
| 16 3                                                    | 20(57.1) | 33(94.3)  | 21(60.0) | 25(71.4) | 28(80.0)  | 31(88.6)  | 32(91.4)  | 27(77.1)  |       |
| 17 >3                                                   | 11(57.9) | 17(89.5)  | 11(57.9) | 8(42.1)  | 11(57.9)  | 14(73.7)  | 18(94.7)  | 11(57.9)  |       |
| <b>Working satisfaction</b>                             |          | 0.094     | 0.027*   | 0.115    | 0.263     | 0.452     | 0.021*    | 0.114     | 0.054 |
| 20 Dissatisfied                                         | 19(40.4) | 38(80.9)  | 18(37.5) | 16(34.0) | 24(51.1)  | 34 (72.3) | 40(83.3)  | 24(50.0)  |       |
| 21 General                                              | 15(35.7) | 33(76.7)  | 23(52.3) | 16(36.4) | 25(56.8)  | 28 (63.6) | 36(81.8)  | 21(47.7)  |       |
| 22 Satisfied                                            | 68(43.7) | 78(87.6)  | 42(47.7) | 35(40.2) | 53(59.6)  | 70 (79.5) | 25(50.0)  | 52(58.4)  |       |
| 23 Very satisfied                                       | 31(59.6) | 52(96.3)  | 33(61.1) | 28(51.9) | 36(66.7)  | 48 (88.9) | 52(96.3)  | 39(72.2)  |       |

24 Note: \*p<0.05, TTMS refers to tuberculosis treatment management service, DOT refers to directly observed therapy, MDR-TB refers to multi-drug resistance tuberculosis, Lower delivery rate refers to a rate below 90%, DOT refers to directly observed therapy

25

26

27

28

29

30

31

32

33

34

35

36

37

38

39

40

41

42

43

44

45

46

**STROBE 2007 (v4) Statement—Checklist of items that should be included in reports of *cross-sectional studies***

| Section/Topic                | Item # | Recommendation                                                                                                                                                                       | Reported on page # |
|------------------------------|--------|--------------------------------------------------------------------------------------------------------------------------------------------------------------------------------------|--------------------|
| <b>Title and abstract</b>    | 1      | (a) Indicate the study's design with a commonly used term in the title or the abstract                                                                                               | 2                  |
|                              |        | (b) Provide in the abstract an informative and balanced summary of what was done and what was found                                                                                  | 2                  |
| <b>Introduction</b>          |        |                                                                                                                                                                                      |                    |
| Background/rationale         | 2      | Explain the scientific background and rationale for the investigation being reported                                                                                                 | 4                  |
| Objectives                   | 3      | State specific objectives, including any prespecified hypotheses                                                                                                                     | 5                  |
| <b>Methods</b>               |        |                                                                                                                                                                                      |                    |
| Study design                 | 4      | Present key elements of study design early in the paper                                                                                                                              | 6                  |
| Setting                      | 5      | Describe the setting, locations, and relevant dates, including periods of recruitment, exposure, follow-up, and data collection                                                      | 7                  |
| Participants                 | 6      | (a) Give the eligibility criteria, and the sources and methods of selection of participants                                                                                          | 8, 9               |
| Variables                    | 7      | Clearly define all outcomes, exposures, predictors, potential confounders, and effect modifiers. Give diagnostic criteria, if applicable                                             | 8, 9               |
| Data sources/<br>measurement | 8*     | For each variable of interest, give sources of data and details of methods of assessment (measurement). Describe comparability of assessment methods if there is more than one group | 10, 11             |
| Bias                         | 9      | Describe any efforts to address potential sources of bias                                                                                                                            | 9                  |
| Study size                   | 10     | Explain how the study size was arrived at                                                                                                                                            | 9                  |
| Quantitative variables       | 11     | Explain how quantitative variables were handled in the analyses. If applicable, describe which groupings were chosen and why                                                         | 10                 |
| Statistical methods          | 12     | (a) Describe all statistical methods, including those used to control for confounding                                                                                                | 10                 |
|                              |        | (b) Describe any methods used to examine subgroups and interactions                                                                                                                  | 10                 |
|                              |        | (c) Explain how missing data were addressed                                                                                                                                          | 10                 |
|                              |        | (d) If applicable, describe analytical methods taking account of sampling strategy                                                                                                   | 10                 |
|                              |        | (e) Describe any sensitivity analyses                                                                                                                                                | 10                 |
| <b>Results</b>               |        |                                                                                                                                                                                      |                    |

|                          |     |                                                                                                                                                                                                              |       |
|--------------------------|-----|--------------------------------------------------------------------------------------------------------------------------------------------------------------------------------------------------------------|-------|
| Participants             | 13* | (a) Report numbers of individuals at each stage of study—eg numbers potentially eligible, examined for eligibility, confirmed eligible, included in the study, completing follow-up, and analysed            | 11,12 |
|                          |     | (b) Give reasons for non-participation at each stage                                                                                                                                                         |       |
|                          |     | (c) Consider use of a flow diagram                                                                                                                                                                           |       |
| Descriptive data         | 14* | (a) Give characteristics of study participants (eg demographic, clinical, social) and information on exposures and potential confounders                                                                     | 11,12 |
|                          |     | (b) Indicate number of participants with missing data for each variable of interest                                                                                                                          | 11,12 |
| Outcome data             | 15* | Report numbers of outcome events or summary measures                                                                                                                                                         | 12-15 |
| Main results             | 16  | (a) Give unadjusted estimates and, if applicable, confounder-adjusted estimates and their precision (eg, 95% confidence interval). Make clear which confounders were adjusted for and why they were included |       |
|                          |     | (b) Report category boundaries when continuous variables were categorized                                                                                                                                    |       |
|                          |     | (c) If relevant, consider translating estimates of relative risk into absolute risk for a meaningful time period                                                                                             |       |
| Other analyses           | 17  | Report other analyses done—eg analyses of subgroups and interactions, and sensitivity analyses                                                                                                               |       |
| <b>Discussion</b>        |     |                                                                                                                                                                                                              |       |
| Key results              | 18  | Summarise key results with reference to study objectives                                                                                                                                                     | 16-20 |
| Limitations              | 19  | Discuss limitations of the study, taking into account sources of potential bias or imprecision. Discuss both direction and magnitude of any potential bias                                                   | 21    |
| Interpretation           | 20  | Give a cautious overall interpretation of results considering objectives, limitations, multiplicity of analyses, results from similar studies, and other relevant evidence                                   | 21    |
| Generalisability         | 21  | Discuss the generalisability (external validity) of the study results                                                                                                                                        | 21    |
| <b>Other information</b> |     |                                                                                                                                                                                                              |       |
| Funding                  | 22  | Give the source of funding and the role of the funders for the present study and, if applicable, for the original study on which the present article is based                                                | 22    |

\*Give information separately for cases and controls in case-control studies and, if applicable, for exposed and unexposed groups in cohort and cross-sectional studies.

**Note:** An Explanation and Elaboration article discusses each checklist item and gives methodological background and published examples of transparent reporting. The STROBE checklist is best used in conjunction with this article (freely available on the Web sites of PLoS Medicine at <http://www.plosmedicine.org/>, Annals of Internal Medicine at <http://www.annals.org/>, and Epidemiology at <http://www.epidem.com/>). Information on the STROBE Initiative is available at [www.strobe-statement.org](http://www.strobe-statement.org).

# BMJ Open

## Tuberculosis treatment management in primary healthcare sectors: a mixed-methods study investigating delivery status and barriers from organizational and patient perspectives

|                                 |                                                                                                                                                                                                                                                                                                                                                                                                                                                                                                                                                                                                                                                                                                                                                                                                                                                                                                                                                                                                                                                                                                                                                                                                                                                                                       |
|---------------------------------|---------------------------------------------------------------------------------------------------------------------------------------------------------------------------------------------------------------------------------------------------------------------------------------------------------------------------------------------------------------------------------------------------------------------------------------------------------------------------------------------------------------------------------------------------------------------------------------------------------------------------------------------------------------------------------------------------------------------------------------------------------------------------------------------------------------------------------------------------------------------------------------------------------------------------------------------------------------------------------------------------------------------------------------------------------------------------------------------------------------------------------------------------------------------------------------------------------------------------------------------------------------------------------------|
| Journal:                        | <i>BMJ Open</i>                                                                                                                                                                                                                                                                                                                                                                                                                                                                                                                                                                                                                                                                                                                                                                                                                                                                                                                                                                                                                                                                                                                                                                                                                                                                       |
| Manuscript ID                   | bmjopen-2021-053797.R2                                                                                                                                                                                                                                                                                                                                                                                                                                                                                                                                                                                                                                                                                                                                                                                                                                                                                                                                                                                                                                                                                                                                                                                                                                                                |
| Article Type:                   | Original research                                                                                                                                                                                                                                                                                                                                                                                                                                                                                                                                                                                                                                                                                                                                                                                                                                                                                                                                                                                                                                                                                                                                                                                                                                                                     |
| Date Submitted by the Author:   | 28-Mar-2022                                                                                                                                                                                                                                                                                                                                                                                                                                                                                                                                                                                                                                                                                                                                                                                                                                                                                                                                                                                                                                                                                                                                                                                                                                                                           |
| Complete List of Authors:       | Zhou, Jiani; Army Medical University, Department of Social Medicine and Health Service Management<br>Pu, Jie; Army Medical University, Department of Social Medicine and Health Service Management<br>Wang, Qingya; Chongqing institute of Tuberculosis prevention and Treatment, Department of districts and counties<br>Zhang, Rui; Army Medical University, Department of Social Medicine and Health Service Management<br>Liu, Shili; Army Medical University, Department of Social Medicine and Health Service Management<br>Wang, Geng; Army Medical University, Department of Social Medicine and Health Service Management<br>Zhang, Ting; Chongqing Institute of Tuberculosis Prevention and Treatment, Department of districts and counties<br>Chen, Yong; Army Medical University, Department of Social Medicine and Health Service Management<br>Xing, Wei; Army Medical University, Department of Social Medicine and Health Service Management<br>Liu, Jiaqing; Army Medical University, Department of Social Medicine and Health Service Management<br>Hu, Daiyu; Chongqing Institute of Tuberculosis Prevention and Treatment, Department of districts and counties<br>Li, Ying; Army Medical University, Department of Social Medicine and Health Service Management |
| <b>Primary Subject Heading</b>: | Health services research                                                                                                                                                                                                                                                                                                                                                                                                                                                                                                                                                                                                                                                                                                                                                                                                                                                                                                                                                                                                                                                                                                                                                                                                                                                              |
| Secondary Subject Heading:      | Health services research, Infectious diseases                                                                                                                                                                                                                                                                                                                                                                                                                                                                                                                                                                                                                                                                                                                                                                                                                                                                                                                                                                                                                                                                                                                                                                                                                                         |
| Keywords:                       | Tuberculosis < INFECTIOUS DISEASES, PRIMARY CARE, HEALTH SERVICES ADMINISTRATION & MANAGEMENT                                                                                                                                                                                                                                                                                                                                                                                                                                                                                                                                                                                                                                                                                                                                                                                                                                                                                                                                                                                                                                                                                                                                                                                         |
|                                 |                                                                                                                                                                                                                                                                                                                                                                                                                                                                                                                                                                                                                                                                                                                                                                                                                                                                                                                                                                                                                                                                                                                                                                                                                                                                                       |

1  
2  
3  
4  
5  
6  
7  
8  
9  
10  
11  
12  
13  
14  
15  
16  
17  
18  
19  
20  
21  
22  
23  
24  
25  
26  
27  
28  
29  
30  
31  
32  
33  
34  
35  
36  
37  
38  
39  
40  
41  
42  
43  
44  
45  
46  
47  
48  
49  
50  
51  
52  
53  
54  
55  
56  
57  
58  
59  
60





I, the Submitting Author has the right to grant and does grant on behalf of all authors of the Work (as defined in the below author licence), an exclusive licence and/or a non-exclusive licence for contributions from authors who are: i) UK Crown employees; ii) where BMJ has agreed a CC-BY licence shall apply, and/or iii) in accordance with the terms applicable for US Federal Government officers or employees acting as part of their official duties; on a worldwide, perpetual, irrevocable, royalty-free basis to BMJ Publishing Group Ltd ("BMJ") its licensees and where the relevant Journal is co-owned by BMJ to the co-owners of the Journal, to publish the Work in this journal and any other BMJ products and to exploit all rights, as set out in our [licence](#).

The Submitting Author accepts and understands that any supply made under these terms is made by BMJ to the Submitting Author unless you are acting as an employee on behalf of your employer or a postgraduate student of an affiliated institution which is paying any applicable article publishing charge ("APC") for Open Access articles. Where the Submitting Author wishes to make the Work available on an Open Access basis (and intends to pay the relevant APC), the terms of reuse of such Open Access shall be governed by a Creative Commons licence – details of these licences and which [Creative Commons](#) licence will apply to this Work are set out in our licence referred to above.

Other than as permitted in any relevant BMJ Author's Self Archiving Policies, I confirm this Work has not been accepted for publication elsewhere, is not being considered for publication elsewhere and does not duplicate material already published. I confirm all authors consent to publication of this Work and authorise the granting of this licence.

1  
2  
3  
4  
5  
6 1 **Tuberculosis treatment management in primary health care sectors: a mixed-methods**  
7  
8 2 **study investigating delivery status and barriers from organizational and patient**  
9  
10 3 **perspectives**

11  
12  
13 4 Jiani Zhou<sup>1</sup>, Jie Pu<sup>1</sup>, Qingya Wang<sup>2</sup>, Rui Zhang<sup>1</sup>, Shili Liu<sup>1</sup>, Geng Wang<sup>1</sup>, Ting Zhang<sup>2</sup>, Yong  
14  
15 5 Chen<sup>1</sup>, Wei Xing<sup>1</sup>, Jiaqing Liu<sup>1</sup>, Daiyu Hu<sup>2§</sup>, YingLi<sup>1§</sup>  
16  
17

18  
19 6 <sup>1</sup> Department of Social Medicine and Health Service Management, Army Medical University  
20  
21 7 (Third Military Medical University), Chongqing, China.  
22

23  
24 8 <sup>2</sup> Department of districts and counties, Chongqing Institute of TB Prevention and Treatment,  
25  
26 9 Jiulongpo District, Chongqing, China.  
27

28  
29 10 <sup>§</sup> Correspondence: Daiyu Hu, Chongqing Institute of TB Prevention and Treatment, Jiulongpo  
30  
31 11 District, Chongqing, China (E-mail:hukaixiu@263.com); Ying Li, Department of Social  
32  
33 12 Medicine and Health Service Management, Army Medical University (Third Military Medical  
34  
35 13 University), China (E-mail:lilyliying2012@163.com).  
36  
37  
38

39 14

40  
41 15

42  
43 16

44  
45 17

46  
47 18

48  
49 19

50  
51 20

52  
53 21

54  
55  
56  
57  
58  
59  
60



## 22 ABSTRACT

23 **Objective** Tuberculosis (TB) treatment management services (TTMSs) are crucial for  
24 improving patient treatment adherence. Under the TB integrated control model in China,  
25 healthcare workers (HCWs) in the primary healthcare (PHC) sectors are responsible for TTMS  
26 delivery. This mixed method study aimed to explore the status of and barriers to TTMS delivery  
27 faced by HCWs in PHC sectors from the health organizational and patient perspectives.

28 **Design** We completed a questionnaire survey of 261 TB HCWs and 459 TB patients in the  
29 PHC sector and conducted 20 semi-structured interviews with health organizational leaders,  
30 TB HCWs, and TB patients. SPSS 22.0 and the framework approach were used for data  
31 analysis.

32 **Setting** Primary healthcare sectors in Southwest China.

33 **Results** Our results showed that TTMS delivery rate by HCWs in PHC sectors was <90%  
34 (88.4%) on average, and the delivery rates of intensive and continuation phase DOT (directly  
35 observed therapy) were only 54.7% and 53.0%, respectively. HCWs with high work  
36 satisfaction and junior titles were more likely to deliver first-time home visits and DOT services.  
37 Our results suggest that barriers to TTMS delivery at the organizational level include limited  
38 patient-centered approaches, inadequate resources and incentives, insufficient training, poor  
39 cross-sectional coordination, and strict performance assessment. At the patient level, barriers  
40 include low socioeconomic status, poor health literacy, and TB-related social stigma.

41 **Conclusion:** TTMSs in Southwest China still need further improvement, and this study  
42 highlighted specific barriers to TTMS delivery in the PHC sector. Comprehensive measures

1  
2  
3  
4  
5 43 are urgently needed to address these barriers at the organizational and patient levels to  
6  
7  
8 44 promote TB control in southwest China.  
9

10 45 **Key words:** tuberculosis, treatment management, healthcare worker, primary healthcare  
11  
12

13 46 **Strengths and limitations of this study**  
14

- 15  
16 47 ● This is a mixed method study on accessing the status of and barriers to tuberculosis  
17  
18 48 treatment management service (TTMS) delivery by healthcare workers (HCWs) in the  
19  
20  
21 49 primary healthcare sectors (PHC) of Southwest China.  
22  
23  
24 50 ● This study collected perspectives from organizations and patients and used the PRISM  
25  
26 51 model to evaluate specific barriers to TTMS delivery.  
27  
28  
29 52 ● We collected 720 questionnaires from HCWs and patients and conducted 20 interviews  
30  
31 53 with leaders, HCWs, and patients in a total of 71 PHC sectors.  
32  
33  
34 54 ● Further studies are required to provide more evidence for producing more effective TB  
35  
36 55 control strategies, as well-evidenced implementation strategies that can address current  
37  
38  
39 56 barriers in TTMS delivery could not be provided in this study.  
40  
41

42 57  
43  
44  
45 58  
46  
47 59  
48  
49  
50 60  
51  
52 61  
53  
54  
55 62  
56  
57 63  
58  
59  
60

## 64 INTRODUCTION

65 Tuberculosis (TB) is a leading cause of death worldwide.<sup>1</sup> According to the World Health  
66 Organization (WHO) global TB report 2021, there was a large global drop in the number of  
67 newly diagnosed TB cases (fall from 7.1 million in 2019 to 5.8 million in 2020).<sup>1</sup> However,  
68 the most immediate consequence of this large drop is an increase in the number of deaths from  
69 TB in 2020 (from an estimated 1.2 million deaths among HIV-negative people in 2019 to an  
70 estimated 1.3 million in 2020).<sup>1</sup> The Chinese government pays great attention to addressing the  
71 TB epidemic and aims to reduce the incidence of TB to less than 55/100,000 by 2022 and  
72 maintain a low mortality rate below 3/100,000 population.<sup>2,3</sup> Although TB case notification in  
73 China has decreased from 70.6/100,000 population in 2012 to 58/100,000 population in 2019,  
74 with a treatment success rate above 90%,<sup>1,2</sup> China is listed as high-burden country with TB,  
75 HIV-associated TB, and multidrug/rifampicin-resistant TB (MDR/RR-TB) for 2021–2025 in  
76 the WHO global TB report 2021.<sup>1</sup>

77 The goal of China's latest Action Plan to Stop TB (2019–2022) is to reduce the incidence  
78 of TB nationwide to less than 55/100,000 population by 2022 and maintain a low mortality rate  
79 below 3/100,000 population.<sup>2</sup> To accomplish this goal, TB prevention and control programs  
80 have been further improved with enhanced service capacity, strengthening the prevention and  
81 control measures for key populations and key areas, advancing standardized diagnosis and  
82 treatment coverage, and increasing the public awareness level of tuberculosis prevention and  
83 control.<sup>2</sup> Patient adherence to anti-TB treatment plays an important role in curing and avoiding  
84 DR-TB (drug-resistant TB); hence, treatment management is essential for TB patients to ensure

1  
2  
3  
4  
5 85 treatment adherence, monitor adverse side effects from treatment, and avoid the development  
6  
7  
8 86 of DR-TB.<sup>4</sup> Since the Chinese National 12th Five-Year TB Control Plan (2011–2015) came  
9  
10  
11 87 out in 2011, the TB control model in China has started using the integrated TB control model  
12  
13  
14 88 in most regions.<sup>5</sup> Under the integrated TB control model, the Centers of Disease Control (CDCs)  
15  
16 89 are responsible for TB program governance, surveillance, training, and health promotion; TB-  
17  
18  
19 90 designated hospitals are responsible for diagnosis and treatment; and primary healthcare (PHC)  
20  
21  
22 91 sectors are responsible for referrals, tracing, health education, and TB treatment management  
23  
24 92 services (TTMS).<sup>5</sup> Later, China's National 13th Five-Year TB Control Plan (2016–2020)  
25  
26 93 combined with the Action Plan to Stop TB (2019–2022) requested further strengthening of TB  
27  
28  
29 94 prevention and control, which emphasized TTMSs and strengthened the implementation of  
30  
31  
32 95 various measures to reduce the TB epidemic in China.<sup>2, 6</sup> TTMSs are one of the key BPHS  
33  
34 96 (basic public health services) programs available to all residents in China (one of the priorities  
35  
36  
37 97 of the new health reform launched in 2009) and is delivered by TB HCWs in the PHC sector.<sup>6</sup>  
38  
39  
40 98 <sup>7</sup> The BPHS guidelines aimed to raise standard TTMS rates and treatment success rates to  
41  
42 99 above 90%.<sup>6, 7</sup> The TTMSs for diagnosed TB patients is delivered by HCWs in the PHC sector,  
43  
44  
45 100 under the supervision of the CDC, with coordination from other departments, such as assistance  
46  
47  
48 101 from the TB-designated hospital to deal with patient side effects and support from the  
49  
50 102 Department of Education to conduct health education in the student population.<sup>7</sup>

51  
52 103 A study in Jiangxi indicated that TTMS under an integrated TB control model improved  
53  
54  
55 104 treatment outcomes.<sup>8</sup> A study in Wuhan indicated that TTMSs are crucial for monitoring  
56  
57  
58 105 treatment complications and reducing the development of DR-TB.<sup>9, 10</sup> Other studies have  
59  
60

1  
2  
3  
4  
5 106 shown that, in more developed areas in China, TTMS coverage was highly improved and  
6  
7  
8 107 produced impressive effects.<sup>8, 9, 11-14</sup> Few studies have reported the status of TTMS delivery in  
9  
10  
11 108 resource-limited and mountainous regions with a high TB/DR-TB burden in China. One study  
12  
13 109 found that only 37.1% of TB patients received TTMSs from HCWs in West China,<sup>15</sup> and study  
14  
15  
16 110 in Chongqing found that 34.3% of TB patients never received TTMSs from HCWs.<sup>16</sup> However,  
17  
18 111 few studies have focused on the perspective of HCWs to evaluate the current TTMS program  
19  
20  
21 112 under the integrated TB control model. Therefore, this study not only aimed to assess the  
22  
23  
24 113 delivery status of the TTMS program from the perspectives of both organizations and patients,  
25  
26 114 but also to explore the specific barriers to TTMS delivery faced by HCWs in PHC sectors in  
27  
28  
29 115 order to provide evidence for promoting TB control and treatment outcomes.

## 31 116 **METHODS**

### 34 117 **Study design**

36 118 This cross-sectional study used mixed research methods<sup>17</sup> to collect data from June to  
37  
38  
39 119 December 2018. Questionnaire surveys and semi-structured in-depth interviews were  
40  
41  
42 120 conducted to evaluate the delivery of TTMSs in the PHC sector from both health organizations  
43  
44  
45 121 (HCWs and leaders) and patients' perspectives.

### 47 122 **Study Setting**

49 123 The prevalence of TB in the western region is significantly higher than that in the central and  
50  
51  
52 124 eastern regions of China.<sup>18</sup> Chongqing Municipality is located at the junction of the Yangtze  
53  
54  
55 125 and Jialing rivers, and it has a population of 32.09 million.<sup>19</sup> This region has a relatively  
56  
57  
58 126 developed socioeconomic status, with a gross domestic product (GDP) of 2.5 trillion CNY and  
59  
60

1  
2  
3  
4  
5 127 a per capita GDP of 55.6 thousand CNY in 2020.<sup>19</sup> Chongqing's growing population depends  
6  
7  
8 128 more on secondary and tertiary industries as the main economic activity.<sup>19</sup> Its urbanization rate  
9  
10  
11 129 and literacy rates were 69.5% and 98.4% respectively in 2021.<sup>19</sup> The TB incidence in  
12  
13 130 Chongqing Municipality (2019) ranks tenth (75/100,000) in China.<sup>20</sup>  
14  
15

16 131 Guizhou Province is a mountainous province in West China with a population of 38.6  
17  
18 132 million.<sup>21</sup> A total of 50.9% of its population depends on tertiary industries as the main source  
19  
20  
21 133 of income.<sup>21</sup> The employment rate and literacy rates were 49.0% and 93.3% respectively in  
22  
23  
24 134 2020.<sup>21</sup> The area maintains a relatively less developed socioeconomic status, with a GDP of  
25  
26 135 1.8 trillion CNY and a per capita GDP of 46.3 thousand CNY in 2020.<sup>21</sup> The incidence of TB  
27  
28  
29 136 in Guizhou Province (2019) was ranked third (133.5/100,000) in Xinjiang and Tibet.<sup>20</sup>  
30

31 137 A stratified random sampling method was used to select the study sites in Chongqing  
32  
33  
34 138 Municipality and Guizhou Province. All counties/districts in Chongqing Municipality and  
35  
36  
37 139 Guizhou Province were grouped into three levels according to their socioeconomic status (GDP)  
38  
39  
40 140 in 2018<sup>22</sup>: the relatively developed (GDP in the highest 30%), the medium developed (GDP in  
41  
42 141 the middle 40%), and the relatively less developed (DGP in the lowest 30%). From each group  
43  
44  
45 142 of counties/districts, four counties/districts were randomly selected as study sites. Twelve  
46  
47 143 districts/counties were included in this study. All of the PHC sectors (including both CHCs and  
48  
49  
50 144 THCs) in the 12 selected counties/districts and a total of 71 PHC sectors were included in this  
51  
52 145 study.  
53

## 54 146 **Study participants and data collection**

### 55 147 **Quantitative study**

1  
2  
3  
4  
5 148 All adult pulmonary TB patients who met the following criteria were recruited from the 71  
6  
7  
8 149 PHC sectors in the 12 selected counties/districts: (1) registered at TB dispensaries and were  
9  
10 150 diagnosed with drug-sensitive pulmonary TB according to national TB diagnosis standards; (2)  
11  
12  
13 151 completed standard anti-TB drug treatment for at least 4 months, which indicated that they  
14  
15  
16 152 received TTMSs for both intensive (first 2 months) and continuation phases (following 4  
17  
18 153 months); and (3) aged 15 years and older. Patients who (1) had extra-pulmonary TB, (2) could  
19  
20  
21 154 not express themselves clearly (had disturbance of consciousness or difficulties with speech or  
22  
23  
24 155 hearing), and (3) were unwilling to participate in the study were excluded. Patient recruitment  
25  
26 156 was facilitated by the local PHC sectors in the study counties/districts. First, the research group  
27  
28  
29 157 members provided a detailed explanation of the study objectives to all the potential participants.  
30  
31 158 Those who were willing to participate in the study were asked to read and sign the informed  
32  
33  
34 159 consent form to ensure confidentiality.

35  
36 160 The sample size was estimated using the Kish and Leslie formula <sup>23</sup>:

$$n = Z_{\alpha}^2 P (1 - P) / d^2.$$

37  
38  
39 161  
40  
41  
42 162 Where,  $n$  is the minimum desired sample size.  $Z_{\alpha}$  is the standard normal deviate, usually set as  
43  
44 163 1.96, corresponding to a 5% level of significance.  $P$  is the average rate of TB treatment  
45  
46  
47 164 management, set at 37.1% based on estimates from the available literature,<sup>15</sup> and  $d$  is the degree  
48  
49  
50 165 of accuracy (precision) set at 5% (0.05). Therefore, the calculated minimum sample size for  
51  
52 166 patient participants was 359. A total of 481 patients with TB were recruited to participate in  
53  
54  
55 167 the survey, of whom 16 declined. Six TB patients <15 years old were excluded, and finally,  
56  
57 168 459 TB patients were included in the analysis (response rate: 95.4%).  
58  
59  
60

1  
2  
3  
4  
5 169 All HCWs who were TB control medical staff in the PHC sectors in the selected  
6  
7  
8 170 counties/districts and who were willing to participate in the study were recruited as participants.  
9  
10  
11 171 TB HCWs unwilling to participate in the study were excluded. There were 261 TB HCWs in  
12  
13 172 the selected counties/districts. Finally, all 261 TB HCWs were recruited and willing to  
14  
15  
16 173 participate in the survey, and zero declined (response rate: 100.0%). Local CDCs in the study  
17  
18 174 districts/counties facilitated HCW recruitment.

21 175 Structured questionnaires were administered to collect data from participating TB patients  
22  
23  
24 176 and HCWs. Among TB patients, the structured survey that was administered asked the  
25  
26 177 participants about their demographic information (e.g., gender, age, and residence) and TTMSs  
27  
28  
29 178 received from HCWs during their treatment (e.g., intensive phase DOT (directly observed  
30  
31 179 therapy) and continuation phase DOT). Among HCWs, the questionnaire included  
32  
33  
34 180 demographic and work-related information (e.g., gender, age, professional title, and working  
35  
36 181 years), work satisfaction, and delivery situation of TTMSs (e.g., first-time home visit).  
37  
38  
39 182 Questionnaires were designed by our research team based on existing literature reports and  
40  
41  
42 183 then we consulted with related experts.

44 184 In the reliability evaluation, Cronbach's  $\alpha$  was calculated to determine the reliability of the  
45  
46  
47 185 questionnaire for TB patients and the HCWs' questionnaire. Cronbach's  $\alpha$  ranges from 0 to 1;  
48  
49  
50 186 the higher the coefficient value ( $>0.8$ ), the better the reliability and internal consistency. Both  
51  
52 187 the TB patients (Cronbach's  $\alpha=0.816$ ) and HCWs (Cronbach's  $\alpha=0.910$ ) questionnaires had  
53  
54  
55 188 good reliability and internal consistency. In the validity evaluation, the face validity coefficient  
56  
57  
58 189 was calculated through the Pearson correlation coefficient ( $r$ ) to determine the validity of the  
59  
60



1  
2  
3  
4  
5 190 questionnaire for TB patients. The questionnaire had  $r>0.4$  and  $P<0.001$ , indicating good face  
6  
7  
8 191 validity. The questionnaire for the HCWs, which contained 60 TTMS questions, also had good  
9  
10  
11 192 construct validity ( $I-CVI=0.850-1.000$ ;  $S-CVI=0.960$ ).

13 193 In the reliability evaluation, Cronbach's  $\alpha$  was calculated to determine the reliability of the  
14  
15  
16 194 questionnaire for TB patients and the HCWs' questionnaire. Cronbach's  $\alpha$  ranges from 0 to 1;  
17  
18  
19 195 the higher the coefficient value ( $>0.8$ ), the better the reliability and internal consistency. Both  
20  
21 196 the TB patients (Cronbach's  $\alpha=0.816$ ) and HCWs (Cronbach's  $\alpha=0.910$ ) questionnaires had  
22  
23  
24 197 good reliability and internal consistency. In the validity evaluation, the face validity coefficient  
25  
26  
27 198 was calculated through the Pearson correlation coefficient ( $r$ ) to determine the validity of the  
28  
29 199 questionnaire for TB patients. The questionnaire had  $r>0.4$  and  $P<0.001$ , indicating good face  
30  
31  
32 200 validity. The questionnaire for the HCWs, which contained 60 TTMS questions, also had good  
33  
34 201 construct validity ( $I-CVI=0.850-1.000$ ;  $S-CVI=0.960$ ).

35  
36  
37 202 All questionnaires were administered by trained investigators from our research group in  
38  
39 203 a meeting or clinic room in each PHC sector. TB patients and HCWs who volunteered to  
40  
41  
42 204 participate in the study were asked to read the informed consent form and sign it. Each  
43  
44  
45 205 completed questionnaire was checked and examined for quality control by trained investigators.

#### 46 47 206 **Qualitative study**

48  
49  
50 207 In-depth interviews were conducted to explore the current status and identify the barriers of  
51  
52  
53 208 TTMS delivery from HCWs to patients with TB. Purposive sampling was used to select  
54  
55 209 participants with different backgrounds, ages, and experiences related to TTMS. An integrated  
56  
57  
58 210 TB control model was established, and TTMSs were provided in all included counties/districts.  
59  
60

1  
2  
3  
4  
5 211 Therefore, in-depth interviews were conducted with: HCWs from the PHC sectors of different  
6  
7  
8 212 socioeconomic levels who had delivered TTMSs for at least one year during the study period;  
9  
10 213 leaders from the local CDC and the Health Commission who were responsible for the TB  
11  
12  
13 214 control program during the study period; and patients from regions of different socioeconomic  
14  
15  
16 215 levels who had received TTMSs and were about to end their TB treatment during the study,  
17  
18 216 which ensured that patients had sufficient experience related to TTMS. During recruitment, all  
19  
20  
21 217 HCWs, leaders, and patients were approached and provided detailed explanations of the study  
22  
23  
24 218 and its objectives. Those who expressed an interest in volunteering to participate in the in-  
25  
26 219 depth interview were asked to read and sign an informed consent form to confirm their  
27  
28  
29 220 voluntary participation in the study.

30  
31 221 The sample size of the qualitative study was determined by the point of data 'saturation.'<sup>24</sup>  
32  
33  
34 222 Recruitment continued until evidence of data saturation was obtained and adding further  
35  
36 223 participants did not generate new findings. Each interview was conducted face-to-face by at  
37  
38  
39 224 least two trained interviewers to enhance the information's trustworthiness and credibility.  
40  
41  
42 225 During each interview, one interviewer performed the interview according to the semi-  
43  
44 226 structured topic guides, while the other interviewer was responsible for taking notes of the key  
45  
46  
47 227 information and could supplement questions to the interview as necessary. At the end of each  
48  
49  
50 228 interview, the interviewers discussed the findings and key information obtained to confirm  
51  
52 229 whether a supplementary interview was required. Information related to TTMS delivery was  
53  
54  
55 230 cross-validated between patients (service receivers) and HCWs (service providers) to increase  
56  
57 231 information trustworthiness. Documentary sources such as regulations and standard service  
58  
59  
60

1  
2  
3  
4  
5 232 procedures have also been utilized to enhance information credibility. Nine purposely selected  
6  
7  
8 233 leaders, 7 HCWs, and 4 patients participated in the in-depth interviews.  
9

10 234 Semi-structured topic guides with open-ended questions were used in all interviews. The  
11  
12  
13 235 guiding framework for topic design was the practical robust implementation and sustainability  
14  
15  
16 236 model (PRISM).<sup>25</sup> This model considers how the intervention design, recipients, external  
17  
18  
19 237 environment, and implementation and sustainability infrastructure influence health program  
20  
21 238 implementation and success, and is widely used as a theoretical framework in implementation  
22  
23  
24 239 research.<sup>25-27</sup> Using the PRISM guide, this study collected data on the barriers to TTMS  
25  
26 240 delivery in terms of the following aspects: (1) intervention design, (2) recipients, (3) external  
27  
28  
29 241 environment, and (4) implementation and sustainability infrastructure. The adaptation of  
30  
31 242 PRISM in this study is illustrated in figure 1. All interviews were conducted in Mandarin or  
32  
33  
34 243 the local language in meeting rooms in the PHC sector. Only participants and interviewers were  
35  
36  
37 244 present at the interview location. Each interview lasted approximately 40–60 minutes and was  
38  
39 245 audio-recorded with the consent of the participants.  
40

#### 41 246 **Data analysis**

42  
43  
44 247 The data analysis integrated quantitative and qualitative data to assess the status of and barriers  
45  
46  
47 248 to TTMS program delivery by HCWs in the PHC sectors. For example, patients' demographic  
48  
49  
50 249 information from questionnaires integrated with the results from in-depth interviews allowed  
51  
52 250 us to determine how patients' social economy and healthy literacy affected TTMS delivery. In  
53  
54  
55 251 addition, qualitative results regarding patient-centered manners, training support provided to  
56  
57  
58 252 HCWs, the workload and performance evaluations of HCWs, and so on, clarified the  
59  
60

1  
2  
3  
4  
5 253 quantitative results regarding the proportion of TTMSs received and the delivery rate of  
6  
7  
8 254 TTMSs by HWCs.  
9

### 10 255 **Quantitative analysis**

11  
12  
13 256 Data were entered using Epi Data 3.1 and then analyzed using the Statistical Package for the  
14  
15  
16 257 Social Sciences (SPSS 22.0 (IBM Corporation, Armonk, NY, USA)). Missing data were  
17  
18  
19 258 excluded from the analysis—when analyzing gender, age, medical school education, major,  
20  
21  
22 259 professional title, number of BPHS programs undertaken, monthly income, and work  
23  
24 260 satisfaction of HCWs, and so on, only 259, 249, 247, 256, 240, 225, 242, and 259 HCWs  
25  
26  
27 261 responded to the questions in the survey; therefore, we removed the data from the HCWs who  
28  
29 262 did not respond to these questions. A two-tailed probability level of  $P<0.05$  was chosen as the  
30  
31  
32 263 level of statistical significance. Descriptive statistics were used to describe the participants'  
33  
34 264 demographic characteristics and TTMS delivery rates. Factors associated with lower delivery  
35  
36 265 rates (<90%), as screened by the chi-square test ( $P<0.05$ ) (appendix 1), were entered into  
37  
38  
39 266 multivariate logistic regression models (delivery rate <90%=1, delivery rate >90%=0), which  
40  
41  
42 267 were used to examine the effects of these factors on TTMS delivery.  
43

### 44 268 **Qualitative analysis**

45  
46  
47 269 The framework approach was used to analyze all qualitative data following a five-step process:  
48  
49  
50 270 (1) familiarization, (2) adapting the theoretical framework, (3) indexing, (4) summarizing, and  
51  
52 271 (5) data synthesis and interpretation.<sup>28-29</sup> Subsequently, all interviews were carefully  
53  
54  
55 272 transcribed into Word documents, reviewed for accuracy, and coded and classified by our  
56  
57  
58 273 research team members. We identified themes of the theoretical framework on TTMS delivery  
59  
60

1  
2  
3  
4  
5 274 barriers based on the four domains of PRISM,<sup>25</sup> including: (1) intervention design (PHC sector  
6  
7  
8 275 resource and patient-centered mannerisms); (2) recipients (human resources and incentives,  
9  
10 276 training support, socio-economy, and health literacy); (3) external environment (health  
11  
12  
13 277 insurance, cross-sectional coordination, and social stigma); and (4) implementation and  
14  
15  
16 278 sustainability infrastructure (performance assessment). All the names of the participants were  
17  
18 279 removed from the results to maintain anonymity. According to the 13th Five-Year TB  
19  
20  
21 280 Prevention and Control Plan, the targeted TTMS delivery rate from HCWs to TB patients  
22  
23  
24 281 is >90%.<sup>5</sup> Therefore, a delivery rate below 90% was described as a lower delivery rate in this  
25  
26 282 study.

### 283 **Definitions**

284 Primary healthcare (PHC) sectors in China include community health centers (CHCs) and  
285 stations in urban areas, township hospital centers (THCs), and village health clinics in rural  
286 areas.<sup>4</sup> Tuberculosis healthcare workers (TB HCWs) include healthcare professionals in the  
287 PHC sector that are responsible for TTMS delivery. Tuberculosis treatment management  
288 services (TTMSs) are one of the key basic public health services available to all residents in  
289 China, and these are delivered by TB HCWs in the PHC sector, with seven themes: first-time  
290 home visits, health education, supervising drug intake, follow-up supervision, case closing  
291 evaluation, other services, and services among patient's family members.<sup>6, 7</sup> Both the Chinese  
292 National BPHS guidelines and the 13th Five-Year TB Prevention and Control Plan set a target  
293 TTMS rate of >90%.<sup>6, 7</sup> Therefore, in this study, a delivery rate <90% is described as a lower

294 delivery rate.

## 295 **Patient and public involvement**

296 There were no patients or public involvement in the design, conduct, reporting, or  
297 dissemination plans of this study.

## 298 **RESULTS**

### 299 **Characteristics of participants**

300 Participants for the quantitative study

301 In total, 261 TB HCWs and 459 TB patients were included in the quantitative analysis (table  
302 1). Among the HCWs, 66.4% (n=172) were female, 71.5% (n=178) were aged 20–39 years  
303 old, 72.4% (n=189) worked at THCs, and 50.0% (n=120) and 35.8% (n=86) had junior and  
304 non-professional titles, respectively. Nearly 60% (n=155) of the HCWs had junior college  
305 education, and over 80% (n=202) had a medical school education background (32.4% majored  
306 in clinical medicine and 30.5% majored in nursing). More than half (56.4%, n=127) of the  
307 HCWs undertook 2–3 BPHS programs in PHC sectors, and only 7.6% (n=17) were dedicatedly  
308 in charge of TB programs. The majority (67.4%, n=163) had a monthly income of 2500–4500  
309 CNY, and notably, 40.5% (n=105) reported low work satisfaction.

310 Among the TB patients, the majority of the patients were male (70%, n=324), married  
311 (69.7%, n=320), of Han ethnicity (78.2%, n=359), and 41.6% (n=191) were aged  $\geq 60$  years. A  
312 total of 82.4% (n=378) of the patients lived in rural residences, and 95.2% (n=437) lived in  
313 permanent residences. Almost 70% (n=315) of the patients were farmer/migrant workers, and  
314 56.0% (n=257) had only primary education or below.

315

**Table 1 Characteristics of participants surveyed by questionnaires**

| Demographic characteristic                | Number | Percentage |
|-------------------------------------------|--------|------------|
| <i>HCWs in questionnaire survey</i>       |        |            |
| Gender (n=259)                            |        |            |
| female                                    | 172    | 66.4       |
| male                                      | 87     | 33.6       |
| Age (n=249)                               |        |            |
| 20-29                                     | 94     | 37.8       |
| 30-39                                     | 84     | 33.7       |
| 40-50                                     | 52     | 20.9       |
| >50                                       | 19     | 7.6        |
| Education (n=259)                         |        |            |
| Technical secondary school or below       | 60     | 23.2       |
| Junior college                            | 155    | 59.8       |
| Undergraduate college or above            | 44     | 17.0       |
| Medical school education (n=247)          |        |            |
| Yes                                       | 202    | 81.8       |
| No                                        | 45     | 18.2       |
| Major (n=256)                             |        |            |
| Clinical Medicine                         | 83     | 32.4       |
| Nursing                                   | 78     | 30.5       |
| Public Health                             | 33     | 12.9       |
| Chinese Medicine                          | 27     | 10.5       |
| Other                                     | 17     | 6.6        |
| Region (n=261)                            |        |            |
| Relatively developed                      | 93     | 35.6       |
| Medium developed                          | 89     | 34.1       |
| Less developed                            | 79     | 30.3       |
| Working place (n=261)                     |        |            |
| Township health center                    | 189    | 72.4       |
| Community health center                   | 72     | 27.6       |
| Professional Title (n=240)                |        |            |
| Non                                       | 86     | 35.8       |
| Junior                                    | 120    | 50.0       |
| Intermediate                              | 31     | 12.9       |
| Deputy senior                             | 3      | 1.3        |
| Number of BPHS programs undertook (n=261) |        |            |
| TB program only                           | 34     | 13.0       |
| 2-3                                       | 139    | 53.3       |
| ≥4                                        | 88     | 33.7       |
| Monthly Income (CNY) (n=242)              |        |            |

|    |                                                   |     |      |
|----|---------------------------------------------------|-----|------|
| 1  |                                                   |     |      |
| 2  |                                                   |     |      |
| 3  |                                                   |     |      |
| 4  |                                                   |     |      |
| 5  | <2500                                             | 52  | 21.5 |
| 6  | 2500-3500                                         | 89  | 36.8 |
| 7  | 3500-4500                                         | 74  | 30.6 |
| 8  | >4500                                             | 27  | 11.2 |
| 9  |                                                   |     |      |
| 10 | Training frequency (n=261)                        |     |      |
| 11 | 0/6 months                                        | 13  | 5.0  |
| 12 | 1/6 months                                        | 56  | 21.5 |
| 13 | 2/6 months                                        | 135 | 51.7 |
| 14 | 3/6 months                                        | 36  | 13.8 |
| 15 | >3/6 months                                       | 21  | 8.0  |
| 16 |                                                   |     |      |
| 17 |                                                   |     |      |
| 18 | Work satisfaction (n=259)                         |     |      |
| 19 | High satisfaction                                 | 58  | 22.4 |
| 20 | Middle satisfaction                               | 96  | 37.1 |
| 21 | Low satisfaction                                  | 105 | 40.5 |
| 22 |                                                   |     |      |
| 23 | <b><i>TB patients in questionnaire survey</i></b> |     |      |
| 24 | Gender (n=459)                                    |     |      |
| 25 | Male                                              | 324 | 70.6 |
| 26 | Female                                            | 135 | 29.4 |
| 27 |                                                   |     |      |
| 28 | Age (n=459)                                       |     |      |
| 29 | <40                                               | 94  | 20.5 |
| 30 | 40-49                                             | 96  | 20.9 |
| 31 | 50-59                                             | 78  | 17.0 |
| 32 | ≥60                                               | 191 | 41.6 |
| 33 |                                                   |     |      |
| 34 |                                                   |     |      |
| 35 | Ethnicity (n=459)                                 |     |      |
| 36 | Han                                               | 359 | 78.2 |
| 37 | Ethnic minority                                   | 100 | 21.8 |
| 38 |                                                   |     |      |
| 39 | Marital status (n=459)                            |     |      |
| 40 | Single                                            | 69  | 15.0 |
| 41 | Married                                           | 320 | 69.7 |
| 42 | Divorced/Widowed                                  | 70  | 15.3 |
| 43 |                                                   |     |      |
| 44 | Residence (n=459)                                 |     |      |
| 45 | Urban                                             | 81  | 17.6 |
| 46 | Rural                                             | 378 | 82.4 |
| 47 |                                                   |     |      |
| 48 | Registered information (n=459)                    |     |      |
| 49 | Permanent resident                                | 437 | 95.2 |
| 50 | Migrant                                           | 22  | 4.8  |
| 51 |                                                   |     |      |
| 52 | Education (n=459)                                 |     |      |
| 53 | Primary and below                                 | 257 | 56.0 |
| 54 | Junior middle school                              | 125 | 27.2 |
| 55 | High school and above                             | 77  | 16.8 |
| 56 |                                                   |     |      |
| 57 | Occupation (n=459)                                |     |      |
| 58 | Staff/Cadre/Retiree                               | 50  | 10.9 |
| 59 |                                                   |     |      |
| 60 |                                                   |     |      |



|                       |     |      |
|-----------------------|-----|------|
| Self-employed         | 10  | 2.2  |
| Farmer/Migrant worker | 315 | 68.6 |
| Student               | 20  | 4.4  |
| Others                | 64  | 13.9 |

Note: *TB* refers to tuberculosis, *HCW* refers to health care worker, *BPHS* refers to basic public health services.

### 316 Participants for the qualitative study

317 Nine organizational leaders, 7 HCWs, and 4 TB patients with TB were interviewed. Most  
 318 organizational leaders were male (7/9), with deputy senior titles (5/9), and worked for 7.6 years  
 319 an average. The majority of HCWs were female (5/7), technical secondary school educated  
 320 (6/7), majored in clinical medicine (4/5), and 4/5 came from CHCs with no or junior  
 321 professional titles. In addition, among four interviewed patients, which included two drug-  
 322 sensitive TB (DS-TB) and two DR-TB patients, respectively, and all patients completed anti-  
 323 TB therapy (6–8 months therapy for DS-TB, and 24 months therapy for DR-TB).

### 324 **Quantitative results regarding TTMS delivery status**

325 The TB patient survey showed that 76.0% (n=349) of the patients received TTMSs from HCWs  
 326 in CHCs at some point during their entire course of treatment (83.7% and 76.7% during their  
 327 intensive and continuation phases, respectively). Just around 40.0% (n=189) received TTMSs  
 328 from HCWs in THCs/village clinics during their whole course of treatment (45.1% and 42.3%  
 329 during their intensive and continuation phases, respectively). Only 17.0% (n=78) received  
 330 standard TTMSs from HCWs during their entire course of treatment (18.1% and 55.8% for  
 331 their intensive and continuation phases, respectively). A total of 2.8% (n=13) did not receive  
 332 TTMSs from HCWs (3.9% and 7.2% during their intensive and continuation phases,  
 333 respectively; table 2).

334 **Table 2** TTMS TB patient received from HCWs during treatment (n=459)

| Variable                                             | Number | Percentage |
|------------------------------------------------------|--------|------------|
| Ever received TTMS from HCWs in CHCs                 |        |            |
| Intensive phase                                      | 384    | 83.7       |
| Continuation phase                                   | 352    | 76.7       |
| Whole course of treatment                            | 349    | 76.0       |
| Ever received TTMS from HCWs in THCs/village clinics |        |            |
| Intensive phase                                      | 207    | 45.1       |
| Continuation phase                                   | 194    | 42.3       |
| Whole course of treatment                            | 189    | 41.2       |
| Received standard TTMS from HCWs                     |        |            |
| Intensive phase                                      | 83     | 18.1       |
| Continuation phase                                   | 256    | 55.8       |
| Whole course of treatment                            | 78     | 17.0       |
| Never received TTMS from HCWs                        |        |            |
| Intensive phase                                      | 18     | 3.9        |
| Continuation phase                                   | 33     | 7.2        |
| Whole course of treatment                            | 13     | 2.8        |

Note: *TB* refers to tuberculosis, *TTMS* refers to tuberculosis treatment management services, *CHC* refers to community health center, *THC* refers to township health center, *HCW* refers to health care worker.

335 The HCWs survey showed that the average delivery rate of TTMSs (involving 60 service  
336 items in total) in the PHC sector was 88.4%, and 13 TTMS items had a lower delivery rate  
337 (<90%). Notably, the delivery rates of DOT in the intensive phase and continuation phases  
338 were low, with proportions of 54.7% and 53.0%, respectively. In addition, less than half (44.9%)  
339 of HCWs in PHC sectors provided services related to collecting patient sputum samples during  
340 the follow-up supervision phase. Less than half of the HCWs provided food or transport  
341 assistance for poor TB patients (45.2%), provided subsistence allowance or psychological  
342 support for migrant patients (49.6%), and provided injection treatment for MDR-TB patients  
343 (41.0%). Moreover, less than 60% provided supervision for newly released prison patients

344 (58.9%) and established platforms for TB patient communication (57.8%). (table 3)

345 **Table 3** TTMS with lower delivery rate provided by HCWs in PHC sectors (n=239)

| Services                                                                                                                  | Delivery rate N (%) |
|---------------------------------------------------------------------------------------------------------------------------|---------------------|
| <b><i>First time home visit</i></b>                                                                                       |                     |
| Patients' peer supervision establish (n=235)                                                                              | 185 (78.7)          |
| <b><i>DOT</i></b>                                                                                                         |                     |
| Intensive phase DOT (n=236)                                                                                               | 129 (54.7)          |
| Continuation phase DOT (n=236)                                                                                            | 125 (53.0)          |
| Regular medicine delivery (n=234)                                                                                         | 160 (68.4)          |
| <b><i>Follow-up supervision</i></b>                                                                                       |                     |
| Sputum sample collection (n=236)                                                                                          | 106 (44.9)          |
| <b><i>Others</i></b>                                                                                                      |                     |
| Providing food or transport assistances for poor TB patient (n=230)                                                       | 104 (45.2)          |
| Providing subsistence allowance or psychological support for migrant patient (n=236)                                      | 117 (49.6)          |
| Providing DOT for migrant TB patient at their convenient time (n=235)                                                     | 203 (86.4)          |
| Providing injection treatment for MDR-TB patient (n=234)                                                                  | 96 (41.0)           |
| Providing supervision for newly released prison patient (n=236)                                                           | 139 (58.9)          |
| Training cured TB patients to provide peer education (n=237)                                                              | 208 (87.8)          |
| Establishing platform for TB patients communication (n=237)                                                               | 137 (57.8)          |
| Referring TB patient with mental/psychological problems or alcohol/drug addiction to receive professional therapy (n=235) | 182 (77.4)          |

Note: *Lower delivery rate* refers to a rate below 90%, *TB* refers to tuberculosis, *TTMS* refers to tuberculosis treatment management service, *DOT* refers to directly observed therapy, *MDR-TB* refers to multidrug-resistant tuberculosis

346 **Factors associated with TTMSs with lower delivery rates**

347 Multivariate logistic regression analysis showed that HCWs with high work satisfaction were  
 348 less likely to have a lower delivery rate to establish patient peer supervision as needed  
 349 (OR=0.182, 95%CI: 0.059–0.562). Among both intensive and continuation phase DOT, HCWs  
 350 with junior titles (OR=0.424, 95%CI: 0.215–0.835) and high work satisfaction (OR=0.326,  
 351 95%CI: 0.140–0.766) were less likely to have lower delivery rates. Similarly, HCWs with  
 352 junior titles (OR=0.458, 95%CI: 0.242–0.865) and high work satisfaction (OR=0.395, 95%CI:  
 353 0.160–0.826) were more likely to deliver sputum sample collection services (table 4).

354 **Table 4** Multivariate logistic regression analysis of factors associated with lower delivery rate of TTMS by HCWs

| Variable                  | Patients' peer supervision establish (n=235)<br>OR (95%CI) | Intensive phase DOT (n=236)<br>OR (95%CI) | Continuation phase DOT (n=236)<br>OR (95%CI) | Regular medicine delivery (n=234)<br>OR (95%CI) | Sputum sample collection (n=236)<br>OR (95%CI) | Injection treatment for MDR-TB patient (n=234)<br>OR (95%CI) | Providing supervision for newly released prison patient (n=236)<br>OR (95%CI) |
|---------------------------|------------------------------------------------------------|-------------------------------------------|----------------------------------------------|-------------------------------------------------|------------------------------------------------|--------------------------------------------------------------|-------------------------------------------------------------------------------|
| <b>Gender</b>             |                                                            |                                           |                                              |                                                 |                                                |                                                              |                                                                               |
| Female                    | Reference                                                  |                                           |                                              | Reference                                       |                                                |                                                              |                                                                               |
| Male                      | 0.577 (0.258-1.270)                                        |                                           |                                              | 0.605(0.320-1.147)                              |                                                |                                                              |                                                                               |
| <b>Age</b>                |                                                            |                                           |                                              |                                                 |                                                |                                                              |                                                                               |
| >50                       |                                                            | Reference                                 |                                              |                                                 |                                                |                                                              |                                                                               |
| 40-50                     |                                                            | 2.053(0.985-4.279)                        |                                              |                                                 |                                                |                                                              |                                                                               |
| 30-39                     |                                                            | 2.230(0.947-5.248)                        |                                              |                                                 |                                                |                                                              |                                                                               |
| <30                       |                                                            | Default                                   |                                              |                                                 |                                                |                                                              |                                                                               |
| <b>Professional Title</b> |                                                            |                                           |                                              |                                                 |                                                |                                                              |                                                                               |
| Non                       |                                                            | Reference                                 | Reference                                    |                                                 | Reference                                      | Reference                                                    | Reference                                                                     |
| Junior                    |                                                            | 0.424(0.215-0.835)*                       | 0.419(0.228-0.771) *                         |                                                 | 0.458(0.242-0.865) *                           | 0.307(0.159-0.594)                                           | 0.681(0.364-1.273)                                                            |
| Intermediate              |                                                            | 0.625(0.233-1.787)                        | 0.860(0.355-2.804)                           |                                                 | 1.137(0.432-2.995)                             | 0.686(0.258-1.827)                                           | 2.107(0.829-5.353)                                                            |
| Deputy senior             |                                                            | 0.276(0.021-3.605)                        | 0.415(0.024-5.020)                           |                                                 | 1.644(0.131-20.581)                            | 0.809(0.054-12.031)                                          | 2.534(0.179-35.887)                                                           |
| <b>Training frequency</b> |                                                            |                                           |                                              |                                                 |                                                |                                                              |                                                                               |
| 0/6 months                |                                                            |                                           |                                              |                                                 | Reference                                      | Reference                                                    | Reference                                                                     |
| 1/6 months                |                                                            |                                           |                                              |                                                 | 2.474(0.566-10.822)                            | 3.533(0.767-16.277)                                          | 4.752(0.858-26.335)                                                           |
| 2/6 months                |                                                            |                                           |                                              |                                                 | 2.890(0.729-11.465)                            | 2.217(0.534-9.199)                                           | 2.568(0.500-13.182)                                                           |
| 3/6 months                |                                                            |                                           |                                              |                                                 | 0.776(0.165-3.660)                             | 0.607(0.126-2.923)                                           | 0.990(0.162-6.048)                                                            |
| >3/6 months               |                                                            |                                           |                                              |                                                 | 2.307(0.432-12.327)                            | 2.841(0.503-16.-54)                                          | 3.346(0.508-22.044)                                                           |
| <b>Work satisfaction</b>  |                                                            |                                           |                                              |                                                 |                                                |                                                              |                                                                               |
| Low satisfaction          | Reference                                                  | Reference                                 | Reference                                    | Reference                                       | Reference                                      |                                                              |                                                                               |
| Middle satisfaction       | 0.354(0.168-0.745) *                                       | 0.449(0.219-0.903) *                      | 0.584 (0.312-1.095)                          | 0.582(0.309-1.094)                              | 0.661(0.304-1.533)                             |                                                              |                                                                               |
| High satisfaction         | 0.182(0.059-0.562) *                                       | 0.326(0.140-0.766) *                      | 0.347(0.163-0.741) *                         | 0.375(0.165-0.853)                              | 0.395(0.160-0.826) *                           |                                                              |                                                                               |

Note: *Lower delivery rate* refers to rate below 90%, *TTMS* refers to tuberculosis treatment management service, *DOT* refers to directly observed therapy, *MDR-TB* refers to multidrug-resistance tuberculosis, *CI* refers to confidence interval, \* refers to  $p < 0.05$ .

355

1  
2  
3  
4  
5  
6 357 **Qualitative results regarding barriers to TTMS delivery**  
7

8 358 The in-depth interviews revealed numerous barriers to TTMS delivery from the four core  
9  
10 359 PRISM domains (table 5).

11  
12  
13 360 1) Interventions

14  
15 361 The current TTMS program was mainly delivered via telephone calls and lacked a sufficient  
16  
17 362 patient-centered approach, which led to patient antipathy to DOT. HCWs suggested that e-  
18  
19 363 health approaches, including APP, would be good methods for delivering TTMSs.  
20  
21  
22

23 364 2) Recipients:

24  
25 365 Most PHC sectors faced insufficient human resources with which to deliver TTMS programs.  
26  
27 366 Every HCWs often undertook more than two BPHS programs. HCWs with this heavy BPHS  
28  
29 367 workload had difficulty delivering standard TTMSs. On the other hand, the PHC sectors also  
30  
31 368 lacked transportation tools with which to facilitate home visits, especially for remote rural TB  
32  
33 369 patients.  
34  
35  
36  
37  
38

39 370 HCWs in the PHC sectors also faced inadequate professional capabilities, especially  
40  
41 371 village doctors, which led to patient distrust and therefore hindered TTMS delivery by HCWs.  
42  
43 372 On the other hand, the PHC sector also lacked sufficient incentives for HCWs in the TTMS  
44  
45 373 program, and almost all HCWs were unsatisfied with their low salaries and subsidies due to  
46  
47 374 their heavy workloads and infection risk of TB. In addition, out-of-pocket expenditures for  
48  
49 375 transportation and telephone charges related to TTMS delivery could further influence HCW's  
50  
51 376 working motivation, performance, and attrition. Moreover, inadequate qualified training  
52  
53 377 (lacked of communication skills and professional knowledge related to TTMS delivery, the  
54  
55  
56  
57  
58  
59  
60

1  
2  
3  
4  
5 378 training approach of TB training mixed with other BPHS programs, and lacked of high-quality  
6  
7  
8 379 TB-specific training for HCWs) support for TB HCWs was also reported by interviewees.  
9  
10 380 Therefore, the current training methods do not provide much support for HCWs' capabilities  
11  
12  
13 381 and performance.

14  
15  
16 382 In terms of patient characteristics, the majority of interviewers claimed that TB is a disease  
17  
18 383 of the poor and that most TB patients were disadvantaged (of older ages, with low education,  
19  
20 384 migrant workers, or with financial difficulties), particularly MDR-TB patients with longer  
21  
22  
23 385 treatment periods, who had poor TB-related health literacy, and had a high risk of rejecting  
24  
25  
26 386 TTMSs. HCWs also mentioned the difficulty of delivering TTMSs to migrant patients because  
27  
28  
29 387 it was difficult to reach them.

30  
31 388 3) External environment:

32  
33  
34 389 On the one hand, inadequate health insurance coverage for medications and tests related to side  
35  
36 390 effects accentuated the financial burden among poor DS-TB patients, and the health coverage  
37  
38  
39 391 was more inadequate for MDR-TB patients with longer treatment periods, which reduced their  
40  
41  
42 392 willingness to receive TTMSs. On the other hand, difficulties in cross-sectional coordination  
43  
44 393 to assist TTMS delivery have been reported, especially support from TB-designated hospitals  
45  
46  
47 394 and other departments, such as departments of public security and education. Furthermore, TB-  
48  
49  
50 395 related social stigma has been reported as one of the main barriers to conducting home visits  
51  
52  
53 396 among urban and young patients who cared about privacy, and these patients were therefore  
54  
55 397 more likely to refuse home visits from HCWs.

56  
57 398 4) Implementation and sustainability infrastructure:  
58  
59  
60

1  
2  
3  
4  
5 399 The performance assessment of TB HCWs might be irrational, considering their heavy  
6  
7  
8 400 workload. One leader pointed out that the purpose of TTMS delivery could be to complete the  
9  
10  
11 401 target indicators, and therefore, lead to substandard TTMSs in patients. Moreover,  
12  
13  
14 402 inappropriate performance assessments also hinder working motivation and increase working  
15  
16 403 attrition among HCWs when delivering TTMSs.

## 17 18 404 **DISCUSSION**

19  
20  
21 405 In China, HCWs in the PHC sector are considered an important part of the integrated TB model,  
22  
23  
24 406 and these workers are responsible for TTMS delivery. This study assessed the delivery of the  
25  
26  
27 407 TTMS program by HCWs in the PHC sector in West China. Although we found that the TTMS  
28  
29  
30 408 delivery rates in the intensive and continuation phases were higher than in a previous study in  
31  
32  
33 409 West China,<sup>15</sup> the standard TTMS (at least 24 times TTMS during their treatment course)  
34  
35  
36 410 delivery rate was far below the required rate of >90%, according to the National TB Control  
37  
38  
39 411 Plan.<sup>6</sup> In addition, our study showed that the number of TB patients receiving DOT from HCW  
40  
41  
42 412 in CHCs (in urban regions) was higher than that from HCW in THCs (in rural regions). This  
43  
44  
45 413 difference might be explained by our qualitative results, as interviewed HCWs reported  
46  
47  
48 414 challenges in delivering TTMSs to remote rural patients due to patients' poor health literacy,  
49  
50  
51 415 which has also been reported in other studies.<sup>18, 30</sup> Our study also indicated that far distances  
52  
53  
54 416 with insufficient transportation tools for HCWs were preventing TTMS delivery. In addition,  
55  
56  
57 417 our study revealed that less than half of HCWs provided services related to collecting patient  
58  
59  
60 418 sputum samples during follow-up supervision, which is much lower than the results reported  
419  
420 in a study in Guizhou (96.56%).<sup>30</sup> Furthermore, we found a low level of work satisfaction

1  
2  
3  
4  
5 420 (22.4%) among TB HCWs, although it was higher than in a previous study (12.2%).<sup>31</sup> Our  
6  
7  
8 421 study results indicated that HCWs with low work satisfaction were more likely to have a low  
9  
10 422 delivery rate of first-time home visits, DOT, and sputum sample collection services. Efforts  
11  
12  
13 423 should be made to maintain and promote HCWs' work satisfaction to enhance TTMS delivery.  
14  
15

16 424 Our study revealed that the current TTMS delivery was confronted with various barriers,  
17  
18 425 despite the fact that TB HCWs in PHC sectors who carried out TTMS programs had made  
19  
20 426 many achievements in West China. At the organizational level, we found that the TTMS  
21  
22 427 programs themselves had several barriers affecting the delivery of services from HCWs. On  
23  
24  
25  
26 428 the one hand, the national TB Action Plan and nationwide TB survey in China<sup>2, 9, 32</sup> mentioned  
27  
28 429 cross-sectional coordination of TTMS delivery; however, we found that HCWs in the PHC  
29  
30 430 sectors still lacked good coordination with other departments, such as coordination from the  
31  
32  
33 431 Department of Education to support students' treatment management and help from the  
34  
35 432 Department of Public Security to trace migrant patients' information. In particular, HCWs from  
36  
37  
38 433 some PHC sectors faced barriers to accessing timely connections with TB HCWs from TB-  
39  
40  
41 434 designated hospitals when addressing TB patients' side effects and treatment adherence. It is  
42  
43  
44 435 difficult to realize the participation of the whole society in terms of TB control in China so  
45  
46  
47 436 far.<sup>33</sup> According to the Action Plan to Stop TB (2019 to 2022) in China,<sup>2</sup> in order to coordinate  
48  
49 437 cross-sectional efforts to support TB prevention and control programs, there is an urgent need  
50  
51  
52 438 to build a multi-sectorial collaboration mechanism led by the National Health Commission  
53  
54 439 (NHC).<sup>29</sup>

55  
56  
57 440 The second barrier that emerges at the health organizational level is the approach to TTMS  
58  
59  
60



1  
2  
3  
4  
5 441 delivery. We found that TTMSs were mainly delivered via telephone calls, results that are  
6  
7  
8 442 consistent with previous studies in West China,<sup>15, 33</sup> and insufficient patient-centered  
9  
10 443 mannerisms could result in patient rejection of DOT and TTMSs by HCWs. A previous study  
11  
12  
13 444 in Indonesia also reported that insufficient patient-centered care was the main treatment barrier  
14  
15  
16 445 for TB patients in high-burden settings.<sup>34</sup> Although research has shown that home visits and  
17  
18 446 DOT led to positive treatment outcomes,<sup>35,36</sup> our study pointed out the need to provide TTMSs  
19  
20  
21 447 through an e-health approach, which was consistent with previous studies that demonstrated  
22  
23  
24 448 the effectiveness of e-health technology for promoting patient treatment adherence.<sup>37-42</sup> It is  
25  
26 449 necessary to explore internet-based case management models, including digitally supported  
27  
28  
29 450 self-management, deliver TTMSs to TB patients living in remote mountainous areas with the  
30  
31 451 help of HCWs in PHC sectors, or provide face-to-face DOT.

32  
33  
34 452 The third barrier at the organizational level is the human health resources for TTMSs in  
35  
36 453 the PHC sectors. Other studies reported that PHC sectors, especially those in rural areas, had a  
37  
38  
39 454 limited number of HCWs with which to conduct BPHS programs, which led to heavy  
40  
41  
42 455 workloads and a “shortage of hands,” as HCWs often carried out multiple assigned services.<sup>43-</sup>  
43  
44 456 <sup>45</sup> We consistently found that PHC sectors, particularly THCs, faced human resource barriers  
45  
46  
47 457 in terms of insufficient and inadequate professional capabilities to deliver the TTMS program.  
48  
49  
50 458 On the one hand, our study showed that a heavy workload with multiple BPHS programs could  
51  
52 459 lead to difficulties in delivering standard TTMSs to TB patients. On the other hand, we found  
53  
54  
55 460 that inadequate professional capabilities, especially village doctors, could lead to patient  
56  
57 461 distrust and hence impede TTMS delivery. Simultaneously, our study revealed that PHC  
58  
59  
60

1  
2  
3  
4  
5 462 sectors lack adequate TB training for HCWs, particularly training related to communication  
6  
7  
8 463 and professional knowledge related to TTMS delivery, resulting in substandard TTMSs. Other  
9  
10  
11 464 studies have proved that on-the-job training is important to improve professional skills among  
12  
13 465 HCWs,<sup>33, 44, 46, 47</sup> especially training emphasizing both knowledge and practice.<sup>48</sup> Furthermore,  
14  
15  
16 466 we found that the performance assessment of HCWs in the TTMS program may be irrational  
17  
18 467 considering their heavy workload, and this led to difficulties in delivering standard TTMSs and  
19  
20  
21 468 hindered their enthusiasm.

22  
23  
24 469 Our results showed that the PHC sectors lack sufficient funding for the TTMS program,  
25  
26 470 and most HCWs are unsatisfied with their low salaries, allowances, or subsidies, which is  
27  
28  
29 471 consistent with other studies.<sup>30</sup> Many studies have also indicated that the diverse issues of  
30  
31 472 financial incentives combined with heavy workloads could influence HCW's motivation and  
32  
33  
34 473 performance.<sup>44, 49-52</sup> The appropriate use of incentives for HCWs is a means of promoting health  
35  
36  
37 474 outcomes with a direct impact on the effectiveness and sustainability of a health program, and  
38  
39 475 this can also improve service delivery rates by enhancing motivation and reducing attrition.<sup>48</sup>  
40  
41  
42 476 Notably, we found that HCWs faced out-of-pocket expenditures related to transportation and  
43  
44  
45 477 telephone charges when delivering TTMSs, which could further impact their work enthusiasm.

46  
47 478 Our results also identified barriers at the patient level regarding TTMS delivery, including  
48  
49  
50 479 their susceptible socioeconomic characteristics (older ages, with low education, migrant status,  
51  
52 480 or poor financial status) and lower literacy regarding TB control. A previous nationwide TB  
53  
54  
55 481 epidemiology survey in China revealed that nearly half (48.8%) of TB patients were aged  $\geq 60$ ,  
56  
57  
58 482 less educated, and over 80% of TB patients had household incomes below local levels.<sup>18</sup> Our  
59  
60

1  
2  
3  
4  
5 483 results indicate that poor socioeconomic characteristics and low TB-related health literacy  
6  
7  
8 484 together impede TTMS delivery. As patients with low socioeconomic features were often  
9  
10  
11 485 found to have a lower educational background, poor health literacy, and were more likely to  
12  
13 486 be non-adherent, they were more likely to refuse HCWs' supervision, which is consistent with  
14  
15  
16 487 other studies.<sup>18, 53, 54</sup> In addition, we found that TTMS delivery among migrant patients was  
17  
18  
19 488 challenging for HCWs because it was difficult to reach them. Other studies also reported that  
20  
21 489 migrant patients that frequently moved residences and had low socioeconomic status had  
22  
23  
24 490 relatively poorer TB-related awareness,<sup>55-57</sup> which could hinder their TB case management.  
25  
26 491 Previous studies revealed that West China had a higher proportion of rural mountain areas as  
27  
28  
29 492 well as domestic migrants than other regions in China, and TB-related awareness among rural,  
30  
31  
32 493 less educated, and migrants was particularly serious.<sup>18, 55, 57-59</sup>

33  
34 494 Our study also discovered that health insurance could not cover all medicines and tests  
35  
36  
37 495 related to side effects, which accentuates the financial burden among poor TB patients and  
38  
39  
40 496 leads to barriers to TTMS delivery. To relieve barriers to TB treatment, it is crucial to address  
41  
42  
43 497 the financial burden of TB treatment among poor patients. Notwithstanding, a previous national  
44  
45  
46 498 TB epidemiology survey in China reported that although over 90% of TB patients had medical  
47  
48  
49  
50 500 of patients paying out-of-pocket was still around 75.0%–84.2%.<sup>18</sup> Several studies and reports  
51  
52  
53 501 mentioned the need to increase the reimbursement ratio and amount provided for TB treatment,  
54  
55  
56 502 to expand the scope of the currently free TB treatment policy, and to strengthen the care and  
57  
58  
59 503 assistance provided to TB patients.<sup>2, 6, 36, 60</sup> In particular, there is a need to target DR-TB and  
60

1  
2  
3  
4  
5 504 impoverished patients with transportation, accommodation, and nutrition allowances during  
6  
7  
8 505 TTMS delivery in order to promote TB control outcomes.  
9

10 506 Promoting TB-related health literacy among patients and enhancing TB-related awareness  
11  
12  
13 507 among the public is urgently necessary. As revealed in our study, not only was poor TB health  
14  
15  
16 508 literacy a barrier to patients, TB-related social stigma also impeded TTMS delivery, especially  
17  
18  
19 509 in urban areas. Previous studies have suggested providing easily understandable TB health  
20  
21 510 education to a particular target population (older ages, less educated, close contacts, and others)  
22  
23  
24 511 with certain modes of health education.<sup>18, 58</sup> Another study indicated that a combination of mass  
25  
26 512 media approaches and interpersonal communication between patients and HCWs could lead to  
27  
28  
29 513 more effective TB control.<sup>59</sup> Similarly, the Chinese Action Plan to Stop TB called for various  
30  
31 514 publicity activities with which to raise awareness of TB, including through traditional media  
32  
33  
34 515 such as television broadcasts and newspapers, as well as through the use of new media such as  
35  
36 516 the WeChat app, to promote the dissemination of scientific TB knowledge and eliminate social  
37  
38  
39 517 discrimination.<sup>2</sup>  
40

#### 41 518 **Strengths and limitations**

42  
43  
44 519 Our study used a mixed research method combining quantitative research (questionnaire  
45  
46  
47 520 surveys) with qualitative research (semi-structured, open-ended in-depth interviews) to assess  
48  
49  
50 521 TTMS program delivery by HCWs in the PHC sectors. Perspectives from organizations and  
51  
52 522 patients were included using the PRISM model to evaluate specific barriers to TTMS delivery.  
53  
54  
55 523 Three levels of the local health organization were involved in our study, which included HCWs  
56  
57 524 as frontline staff, CDC leaders as managers, and health commission leaders as policy makers.  
58  
59  
60

1  
2  
3  
4  
5 525 However, the current study had several limitations. First, the sample size of both the  
6  
7  
8 526 questionnaire survey and the in-depth interviews could be further expanded to enhance the  
9  
10  
11 527 representativeness of the study. Second, as we only explored the status of and barriers to TTMS  
12  
13 528 delivery by HCWs in PHC sectors, well-evidenced implementation strategies that can solve  
14  
15  
16 529 the current problems successfully were not provided in this study. Further studies are required  
17  
18  
19 530 to provide evidence for the development of more comprehensive and effective TB control  
20  
21 531 strategies.

## 532 **Conclusion**

533 The HCWs in the TTMS program suggested that the government realized the importance of  
534 HCWs in the PHC sectors in promoting TB patient treatment adherence and outcomes and  
535 underscored their integration into the TB control model. We identified barriers operating at the  
536 organizational level (cross-sectional coordination, patient-centered approaches, resources and  
537 incentives, training support, reimbursement issues, and performance assessments) and patient  
538 level (socioeconomic characteristics, health literacy, and social stigma) to TTMS delivery by  
539 HCWs in the PHC sector. There is an urgent need to identify comprehensive measures to  
540 effectively overcome barriers to TTMS delivery and further promote TB control in southwest  
541 China.

542 **Acknowledgements** We would like to thank the participants who responded our questionnaires.  
543 We also thank all leaders and healthcare workers in the PHCs in study places who supported  
544 this study by facilitating implementation of the field questionnaire survey and participated in  
545 our interviews. We would like to thank Editage ([www.editage.cn](http://www.editage.cn)) for English language editing.

546 **Contributions** JZ, JP and YL have designed this survey, JZ, JP, GW, WX, TZ, SL and QW

1  
2  
3  
4  
5 547 have collected data, JZ, JP, RZ, YC and JL have managed and analyzed data, YL and DH have  
6  
7 548 controlled the quality of data collection and analysis, JZ has drafted the manuscript. YL has  
8  
9 549 edited the manuscript. All authors have interpreted the results, revised the report and completed  
10  
11 550 the final version. The author(s) read and approved the final manuscript.

12  
13 551 **Funding** The study was funded by the National Natural Science Foundation of China  
14  
15 552 (No.81773489), the Chongqing outstanding youth project (No.cstc2020jcyj-jq0035), Social  
16  
17 553 Science and Technology Innovation Subject in Chongqing (No.cstc2015shmszx120070).

18  
19 554 **Disclaimer** The funders had no role in study design, data collection and analysis, interpretation  
20  
21 555 of the data, writing the paper and the decision to submit the paper for publication.

22  
23 556 **Competing interests** Not declared

24  
25 557 **Patient consent** Obtained.

26  
27 558 **Ethics approval** Ethics approval was obtained from the Institutional Review Board of Army  
28  
29 559 Medical University (Third Military Medical University), Chongqing, China (No.AF/SC-08/1.0)  
30  
31 560 before starting the study. This study was conducted in accordance with the Declaration of  
32  
33 561 Helsinki. A full explanation of the purpose and procedure of the study was provided to  
34  
35 562 participants prior to obtain their written informed consent. All demographic data and quotes  
36  
37 563 used in this study were deidentified to maintain the anonymity of participants.

38  
39 564 **Provenance and peer review** Not commissioned; externally peer reviewed.

40  
41 565 **Data availability statement** Data are available upon reasonable request.

42  
43 566 **Supplemental material** This content has been supplied by the author(s). It has not been vetted  
44  
45 567 by BMJ Publishing Group Limited (BMJ) and may not have been peer-reviewed. Any opinions  
46  
47 568 or recommendations discussed are solely those of the author(s) and are not endorsed by BMJ.  
48  
49 569 BMJ disclaims all liability and responsibility arising from any reliance placed on the content.  
50  
51 570 Where the content includes any translated material, BMJ does not warrant the accuracy and  
52  
53 571 reliability of the translations (including but not limited to local regulations, clinical guidelines,  
54  
55 572 terminology, drug names and drug dosages), and is not responsible for any error and/or  
56  
57 573 omissions arising from translation and adaptation or otherwise.

58  
59 574 **Open access** This is an open access article distributed in accordance with the Creative  
60

1  
2  
3  
4  
5 575 Commons Attribution Non Commercial (CC BY-NC 4.0) license, which permits others to  
6  
7 576 distribute, remix, adapt, build upon this work non-commercially, and license their derivative  
8  
9 577 works on different terms, provided the original work is properly cited, appropriate credit is  
10  
11 578 given, any changes made indicated, and the use is non-commercial.  
12  
13 579 See: <http://creativecommons.org/licenses/by-nc/4.0/>.

#### 14 580 **References:**

- 16 581 [1]. World Health Organization. Global tuberculosis report 2021. Geneva: World Health Organization;  
17  
18 582 2021. Licence: CC BY-NC-SA 3.0 IGO
- 19 583 [2]. National Health Commission. Stop TB Action Plan (2019-2022). 2019. Available:  
20  
21 584 <http://www.nhc.gov.cn/jkj/s3589/201906/b30ae2842c5e4c9ea2f9d5557ad4b95f.shtml>. [Accessed  
22  
23 585 11 Feb 2022].
- 24 586 [3]. Li T, Du X, Liu X, Li Y, Zhao Y. Implementation Performance of Tuberculosis Control in China:  
25  
26 587 2011-2020. *China CDC Wkly*. 2021 Mar 19;3(12):252-255.
- 27 588 [4]. World Health Organization: Treatment of tuberculosis: Guidelines for national programmes  
28  
29 589 (4<sup>th</sup> edition), 2010. Available:  
30  
31 590 [https://www.ncbi.nlm.nih.gov/books/NBK138748/pdf/Bookshelf\\_NBK138748.pdf](https://www.ncbi.nlm.nih.gov/books/NBK138748/pdf/Bookshelf_NBK138748.pdf). [Accessed 11  
32  
33 591 Feb 2022].
- 34 592 [5]. Ministry of Health of the People's Republic of China. National tuberculosis control programme  
35  
36 593 (2011-2015). 2011. National Health Commission. Stop TB Action Plan (2019-2022). 2019.  
37  
38 594 Available: [http://www.gov.cn/gongbao/content/2011/content\\_2020914.htm](http://www.gov.cn/gongbao/content/2011/content_2020914.htm). [Accessed 11 Feb  
39  
40 595 2022].
- 41 596 [6]. General Office of the State Council of the People's Republic of China. The 13th five-year plan for  
42  
43 597 the prevention and control of tuberculosis. 2017. Available:  
44  
45 598 [http://www.gov.cn/zhengce/content/2017-02/16/content\\_5168491.htm](http://www.gov.cn/zhengce/content/2017-02/16/content_5168491.htm). [Accessed 11 Feb 2022].
- 46 599 [7]. National Health Commission of the People's Republic of China. National basic public health service  
47  
48 600 standard (3rd edition). 2017.  
49  
50 601 Available: <http://www.nhc.gov.cn/jws/s3578/201703/d20c37e23e1f4c7db7b8e25f34473e1b.shtml>  
51  
52 602 l. [Accessed 11 Feb 2022].
- 53 603 [8]. Chen YF. Discussion on the effect of the integrated tuberculosis prevention and control model in  
54  
55 604 Dongxiang County. *Foreign Medical science section of medgeograpy*, 2014; 35 (3).
- 56 605 [9]. Chen XJ, Feng ZC. Analysis of the implementation effect of the integrated tuberculosis prevention  
57  
58 606 and control model in Wuhan. *Medicine and society*. 2014;27(2):62-4.
- 59 607 [10]. Wu XD. The impact of community supervisors' supervision and management visits on the rate and  
60  
608 curative effect of non-hospital pulmonary tuberculosis patients. *World Latest Medicine*  
609  
610 *Information*. 2018;18(90):210.



- 1  
2  
3  
4  
5 610 [11]. Zhang SN, Yuan ZA, Mei J, et al. The effectiveness of the new TB control network in Shanghai.  
6 611 *Chin J Antituberc.* 2007;29(1):74–7.
- 7  
8 612 [12]. Wang XY. Evaluation on effectiveness of the new trinity TB control network in Wujin District of  
9 613 Changzhou. *Jiangsu J Prev Med.* 2013;24(5):18–20.
- 10  
11 614 [13]. Jing GQ, Qian QW, Ding TD. The effects of tuberculosis prevention and control using the  
12 615 integrated mode in Bengbu. *Anhui J Prev Med.* 2012;18(6): 425–6.
- 13  
14 616 [14]. Xie MF, Lai SF, Lian ST. Analysis on the effect of integrated tuberculosis control mode, Wuping  
15 617 county. *Prev Med Trib.* 2018;24(1):76–8
- 16  
17 618 [15]. Pu J, Chen W, Jiang WX, et al. Is tuberculosis patients management improved in the integrated  
18 619 TB control model in West China? A survey in Guizhou Province, China. *Infect Dis Poverty.* 2019  
19 620 Jul 2;8(1):55.
- 20  
21 621 [16]. Li Y, Ehiri J, Oren E, et al. Are we doing enough to stem the tide of acquired MDR-TB in countries  
22 622 with high TB burden? Results of a mixed method study in Chongqing, China. *PLoS One.* 2014  
23 623 Feb 5; 9 (2):e88330.
- 24  
25 624 [17]. Fetters MD, Curry LA, Creswell JW. Achieving integration in mixed methods designs-principles  
26 625 and practices. *Health Serv Res.* 2013;48:2134 – 56.
- 27  
28 626 [18]. Yu Wang. The fifth national tuberculosis epidemiological sampling survey. *Beijing: Military*  
29 627 *Medical Science Press.* 2011.10
- 30  
31 628 [19]. Chongqing Statistics Bureau. Chongqing Statistical Yearbook 2021. (2021). Available:  
32 629 <http://tjj.cq.gov.cn/cqtjj2021/indexch.htm>. [Accessed 11 Feb 2022].
- 33  
34 630 [20]. Q Wang, T Li, X Du, et al. Analysis in the incidence of national tuberculosis reports from 2015-  
35 631 2019. *Chinese Journal of Antituberculosis.* 2021; 43(02):107-112.
- 36  
37 632 [21]. Guizhou Statistics Bureau. Guizhou Statistical Yearbook 2021. (2021). Available:  
38 633 <http://hgk.guizhou.gov.cn/publish/tj/2021/zk/indexch.ht>. [Accessed 11 Feb 2022].
- 39  
40 634 [22]. National Bureau of Statistics. China Statistical Year book: China Statistics Press. 2018. Available:  
41 635 <http://www.stats.gov.cn/tjsj/ndsj/2018/indexch.htm>. [Accessed 11 Feb 2022].
- 42  
43 636 [23]. Bolarinwa OA. Sample size estimation for health and social science researchers: The principles  
44 637 and considerations for different study designs. *Niger Postgrad Med J.* 2020 Apr-Jun;27(2):67-75.
- 45  
46 638 [24]. Saunders B, Sim J, Kingstone T, Baker S, Waterfield J, Bartlam B, et al. Saturation in qualitative  
47 639 research: exploring its conceptualization and operationalization. *Qual Quant.* 2018;52(4):1893-  
48 640 1907.
- 49  
50 641 [25]. Feldstein, A.C, R.E. Glasgow. A practical, robust implementation and sustainability model  
51 642 (PRISM) for integrating research findings into practice. *Jt Comm J Qual Patient Saf.* 2008; 34(4):  
52 643 p. 228-43.
- 53  
54 644 [26]. Liles, E.G, et al. Implementation challenges and successes of a population-based colorectal cancer  
55 645 screening program: a qualitative study of stakeholder perspectives. *Implementation Science.* 2015;  
56 646 10(1).
- 57  
58  
59  
60



- 1  
2  
3  
4  
5 647 [27].Schneider, J.L, et al Stakeholder perspectives on implementing a universal Lynch syndrome  
6 648 screening program: a qualitative study of early barriers and facilitators. *Genetics in Medicine*. 2016;  
7 649 18(2): p. 152-161.
- 9 650 [28].Smith J, Firth J. Qualitative data analysis: the framework approach. *Nurse Researcher*. 2011; 18(2):  
11 651 52–62.
- 12 652 [29].Ward DJ, Furber C, Tierney S, Swallow V. Using Framework Analysis in nursing research: A  
13 653 worked example. *J Adv Nurs*. 2013; 69(11): 2423–31.
- 15 654 [30].YY He, JL Li, W Chen, L Luo, Y Shang, JH Xu. Analysis on the implementation of basic public  
16 655 health tuberculosis service items in Guizhou Province. *Studies of Trace Elements and Health*. 2020;  
17 656 37(02):54-57.
- 20 657 [31].Gaspar LMDS, Braga C, Albuquerque GDM, Silva MPN, Maruza M, Montarroyos UR, et al.  
21 658 Knowledge, attitudes and practices of community health agents regarding pulmonary tuberculosis  
22 659 in a capital city in northeastern Brazil. *Cien Saude Colet*. 2019; 26;24(10):3815-3824.
- 24 660 [32].Hui Z, Xiaoqi L, Caihong X, Dongmei H, Xue L, Tao L, et al. Guiding Tuberculosis Control  
25 661 Through the Healthy China Initiative 2019–2030. *China CDC Weekly*. 2020, 2(49): 948-950.
- 27 662 [33].Liu GH, Deng J, Chen W. Investigation on the status of needs on community doctors for  
28 663 tuberculosis management in Guizhou Province. *China Health Industry*. 2019;16(21):11-13.
- 30 664 [34]. Pradipta IS, Idrus LR, Probandari A, Lestari BW, Diantini A, Alffenaar JC, Hak E. Barriers and  
31 665 strategies to successful tuberculosis treatment in a high-burden tuberculosis setting: a qualitative  
32 666 study from the patient's perspective. *BMC Public Health*. 2021 Oct 21;21(1):1903.
- 35 667 [35].Xu L, Gai R, Wang X, Liu Z, Cheng J, Zhou C, Liu J, Zhang H, Li H, Tang W. Socio-economic  
36 668 factors affecting the success of tuberculosis treatment in six counties of Shandong Province China.  
37 669 *The International Journal of Tuberculosis and Lung Disease*. 2010;14(4):440–6.
- 39 670 [36].Noé A, Ribeiro RM, Anselmo R, et al. Knowledge, attitudes and practices regarding tuberculosis  
40 671 care among health workers in Southern Mozambique. *BMC Pulm Med*. 2017 Jan 5;17(1):2.
- 42 672 [37]. Chongqing tuberculosis dispensary. Implementation plan of the Chongqing Stop Tuberculosis  
43 673 Action (2019-2022). 2020. Available: <http://www.cqtb.org/html/zcfg/20/01/1121.html>. [Accessed  
44 674 11 Feb 2022].
- 46 675 [38].Zhang H, Liu JJ. The overview and prospect of tuberculosis control in China since the founding  
47 676 of the Peoples Republic of China. *Chin J Antituberc*. 2019; 41(9):913 – 6.
- 49 677 [39].Liu X, Lewis JJ, Zhang H, et al. Effectiveness of Electronic Reminders to Improve Medication  
50 678 Adherence in Tuberculosis Patients: A Cluster-Randomised Trial. *PLoS Med*. 2015 Sep 15; 12  
51 679 (9):e1001876.
- 54 680 [40]. Alipanah N, Jarlsberg L, Miller C, et al. Adherence interventions and outcomes of tuberculosis  
55 681 treatment: A systematic review and meta-analysis of trials and observational studies. *PLoS Med*.  
56 682 2018 Jul 3;15 (7):e1002595.
- 58 683 [41].Nhavoto JA, Grönlund Å, Klein GO. Mobile health treatment support intervention for HIV and  
59  
60

1  
2  
3  
4  
5  
6  
7  
8  
9  
10  
11  
12  
13  
14  
15  
16  
17  
18  
19  
20  
21  
22  
23  
24  
25  
26  
27  
28  
29  
30  
31  
32  
33  
34  
35  
36  
37  
38  
39  
40  
41  
42  
43  
44  
45  
46  
47  
48  
49  
50  
51  
52  
53  
54  
55  
56  
57  
58  
59  
60

- tuberculosis in Mozambique: Perspectives of patients and healthcare workers. *PLoS One*. 2017 Apr 18;12(4):e0176051.
- [42]. Wang N, Zhang H, Zhou Y, et al. Using electronic medication monitoring to guide differential management of tuberculosis patients at the community level in China. *BMC Infect Dis*. 2019 Oct 15;19(1):844.
- [43]. Huang et al. *Global Health Research and Policy*. 2018. (3):18. Available: <https://doi.org/10.1186/s41256-018-0072-0>. [Accessed 11 Feb 2022].
- [44]. Tao T, Zhao Q, Jiang S, et al. Motivating health workers for the provision of directly observed treatment to TB patients in rural China: does cash incentive work? A qualitative study. *Int J Health Plann Manag*. 2013;28(4):e310–24.
- [45]. Liang S, Deng H, Liu S, et al. Competency building for lay health workers is an intangible force driving basic public health services in Southwest China. *BMC Health Serv Res*. 2019 Aug 23;19(1):596.
- [46]. Edwards NC, Roelofs SM. Sustainability: The elusive dimension of international health projects. *Can J Public Health*. 2006;97:45–9. Available: <http://www.jstor.org/stable/41994677>. [Accessed 11 Feb 2022].
- [47]. Li N, Yan LL, Niu W, et al. The effects of a community-based sodium reduction program in rural China—a clusterrandomized trial. *PLoS One*. 2016;11(12):e0166620..
- [48]. World Health Organization. WHO guideline on health policy and system support to optimize healyhcare worker programmes. Geneva: World Health Organization. 2018.
- [49]. Campbell C, Scott K. Retreat from Alma Ata? The WHO's report on task shifting to healyhcare workers for AIDS care in poor countries. *Glob Public Health*. 2011;6 (2):125–38.
- [50]. Jaskiewicz W, Tulenko K. Increasing healyhcare worker productivity and effectiveness: a review of the influence of the work environment. *Hum Resour Health*. 2012; 10 (1):1.
- [51]. Hemminki E, Long Q, Zhang W-H, et al. Impact of financial and educational interventions on maternity care: results of cluster randomized trials in rural China, CHIMACA. *Matern Child Health J*. 2013; 17 (2):208–21.
- [52]. Meng Q, Li R, Cheng G, et al. Provision and financial burden of TB services in a financially decentralized system: a case study from Shandong, China. *Int J Health Plann Manag*. 2004;19(S1):S45–62.
- [53]. Hutchison C, Khan MS, Yoong J, et al. Financial barriers and coping strategies: a qualitative study of accessing multidrug-resistant tuberculosis and tuberculosis care in Yunnan, China. *BMC Public Health*. 2017 Feb 22;17(1):221.
- [54]. Onah CK, Azuogu BN, Ossai EN, et al. Addressing constraints to informal providers' involvement in tuberculosis control: a qualitative study of patent medicine dealers and tuberculosis programme managers. *Glob Health Res Policy*. 2021 Nov 8;6(1):43.
- [55]. Wang SN, Deng YH, Shi YY, et al. Investigation on knowledge of tuberculosis prevention and

- 721 treatment among floating population tuberculosis patients in Putuo District, Shanghai. *Health*  
 722 *Education and Promotion*.2020,15(06):636-638.
- 723 [56].Ma Y, Liu YH, Du J, et al. Survey on awareness of core information of tuberculosis prevention  
 724 and control knowledge in pulmonary tuberculosis patients. *Chinese Anti-tuberculosis Journal*.  
 725 2015 (10).
- 726 [57].Zou X, Zhou L, Wu H, et al. The role of tuberculosis control institutes in delivering tuberculosis  
 727 information to domestic migrants in China: A multi-level analysis of a nationwide cross-sectional  
 728 survey. *Int J Infect Dis*. 2019; 86:94-101.
- 729 [58].Chen W, Li Y, Yang H, et al. Is tuberculosis health education reaching the public in China? A  
 730 cross-sectional survey in Guizhou Province. *BMJ Open*. 2016; 6(9):e013534.
- 731 [59].Arulchelvan S, Elangovan R. Effective communication approaches in tuberculosis control: Health  
 732 workers' perceptions and experiences. *Indian J Tuberc*. 2017;64(4):318-322.
- 733 [60]. Rawal LB, Kanda K, Biswas T, et al. Health problems and utilization of health services among  
 734 Forcibly Displaced Myanmar Nationals in Bangladesh. *Glob Health Res Policy*. 2021 Oct  
 735 11;6(1):39.

## 736 FIGURE LEGENDS

737 **Figure 1** Adapted PRISM for barriers on TTMS delivery in PHC sectors. This figure presents  
 738 the four core domains of the Practical Robust Implementation and Sustainability Model  
 739 (PRISM) for barriers on TTMS delivery in PHC sectors, including: 1) TTMS program design;  
 740 2) the recipients, 3) the external environment, and 4) the implementation and sustainability  
 741 infrastructure. Activated elements for each domains were presented in boxes. Notes: *TTMS*  
 742 refers to tuberculosis treatment management service; *PHC* refers to primary healthcare; *HCW*  
 743 refers to healthcare worker).

744  
 745 **Table 5** Barriers of TTMS delivery by HCWs in PHC sectors

| Core PRISM domains | Results | Quotations |
|--------------------|---------|------------|
|--------------------|---------|------------|

|                                       |                                                                                                                                                                                                                                                                                                                                                                                                                                                                                                                                                                                                                                                                                                                                                                                                                                                                                                                                     |                                                                                                                                                                                                                                                                                                                                                                                                                                                                                                                                                                                                                                                                                                                                                                                                                                                                                                                                                                                                                                                                            |
|---------------------------------------|-------------------------------------------------------------------------------------------------------------------------------------------------------------------------------------------------------------------------------------------------------------------------------------------------------------------------------------------------------------------------------------------------------------------------------------------------------------------------------------------------------------------------------------------------------------------------------------------------------------------------------------------------------------------------------------------------------------------------------------------------------------------------------------------------------------------------------------------------------------------------------------------------------------------------------------|----------------------------------------------------------------------------------------------------------------------------------------------------------------------------------------------------------------------------------------------------------------------------------------------------------------------------------------------------------------------------------------------------------------------------------------------------------------------------------------------------------------------------------------------------------------------------------------------------------------------------------------------------------------------------------------------------------------------------------------------------------------------------------------------------------------------------------------------------------------------------------------------------------------------------------------------------------------------------------------------------------------------------------------------------------------------------|
| <p>Intervention:<br/>TTMS program</p> | <p><b>Patient-centered manner:</b><br/>Both DS-TB and MDR-TB patients stated they received TTMS from HCWs in PHC sectors by telephone. Some HCWs reported that some patients expressed antipathy to DOT and the current approach to deliver TTMS, maybe new e-health approach should be considered.</p>                                                                                                                                                                                                                                                                                                                                                                                                                                                                                                                                                                                                                             | <p><i>Got telephone calls during the first 2 months, very few afterwards...I didn't like (DOT). (DS-TB patient)</i><br/><i>Only received telephone calls from HCW in town, once per month. (MDR-TB patient)</i><br/><i>There is one MDR-TB patient...say it is annoying to call him every day (by us to deliver TTMS program). (HCW)</i><br/><i>I think that we can remind patients to take medicine via digital technologies. Although, the elders may not use phone adroitly, we find that they missed drug taking less frequently than the young patients. So, we can remind young patients through APP in mobile phone. (HCW)</i></p>                                                                                                                                                                                                                                                                                                                                                                                                                                  |
| <p>Recipients</p>                     | <p><b>Resources and incentive in PHC sectors:</b><br/>Majority HCWs and leaders stated that PHC sectors, particularly THCs faced insufficient human resource HCWs to deliver TTMS program. HCWs often undertook more than 2 BPHS programs which led to hardship to deliver standard TTMS to TB patients. And inadequate professional capability, particularly village doctors, led to patients' distrusts and therefore hindered TTMS delivery.<br/>Many HCWs claimed that PHC sectors lacked transportation tools to facilitate home-visits especially for remote rural patients<br/>Moreover, majority HCWs and leaders reported that lack of incentive for HCWs in TTMS program, and almost all HCWs unsatisfied with low subsidy, allowance, and salary regarding their heavy workload and infection risk. Out-of-pocket expenditure for transportations and telephone charges for TTMS delivery was also reported by HCWs.</p> | <p><i>Too many works, it is hard to communicated well with patients...I have 2-3 days a week to give phone calls to TB patients, too tired...we often take two works by one person, the workloads are huge. (HCW)</i><br/><i>Insufficient and unstable HCWs ...one HCW leave, then we need to train a new one...(CDC leader)</i><br/><i>HCWs, especially at TCHs, low quality, patients don't trust them. (CDC leader)</i><br/><i>Lacking transportation tools for home-visit, some (patients) live in rural area, far away...need to take a long distance to visit one patient. (HCW)</i><br/><i>We face high risks of infection. There are no subsidies for us to provide manage. Funding for TTMS delivery is not separated from subsidies for the whole BPHS program. Actually, those subsidies from BPHS is not even enough for my telephone and transportation costs. (HCW)</i><br/><i>Without subsidies, the HCWs motivation and working satisfaction is low...they just to complete tasks and will not really care about the quality of TTMS. (CDC leader)</i></p> |
|                                       | <p><b>Training support to HCWs in PHC sectors:</b><br/>Many HCWs stated that TB trainings lack of adequate professional knowledge and communication skill for TTMS delivery. Both HCWs and leaders mentioned lack of TB-specific training for HCWs.</p>                                                                                                                                                                                                                                                                                                                                                                                                                                                                                                                                                                                                                                                                             | <p><i>2-3 TB trainings each year, from CDC...combined with other (BPHS) trainings...and I think this training is not effective. (HCW)</i><br/><i>It is harder to communicate with MDR-TB patients. Sometimes they seem know more about treatment than me. Prolonged illness makes a doctor of a patient. (HCW)</i></p>                                                                                                                                                                                                                                                                                                                                                                                                                                                                                                                                                                                                                                                                                                                                                     |
|                                       | <p><b>Patient's socio-economy:</b><br/>Most HCWs and leaders consistently agreed that most TB patients were old age and living with low socioeconomic status, have high risk to reject TTMS. Due to the long treatment period, the financial burden on MDR-TB patients is particularly heavy, resulting in poor adherence and TTMS difficulty. Some HCWs also stated the hardship to deliver TTMS among migrant patients since hard to reach them.</p>                                                                                                                                                                                                                                                                                                                                                                                                                                                                              | <p><i>During treatment in later period, I didn't (take sputum test), no money, no money for transportation. (DS-TB patient)</i><br/><i>Cannot bear the financial burden... costs of follow-up examinations, CT, and medicines. (MDR-TB patient)</i><br/><i>Because TB itself is a "disease of the poor", most TB patients have financial difficulties with bad lifestyles and poor literacy. (HC leader) Migrant patients are hard to reach...some have no stable</i></p>                                                                                                                                                                                                                                                                                                                                                                                                                                                                                                                                                                                                  |

|                                                         |                                                                                                                                                                                                                                                                                                                                                                                                                                               |                                                                                                                                                                                                                                                                                                                                                                                                                                                                                       |
|---------------------------------------------------------|-----------------------------------------------------------------------------------------------------------------------------------------------------------------------------------------------------------------------------------------------------------------------------------------------------------------------------------------------------------------------------------------------------------------------------------------------|---------------------------------------------------------------------------------------------------------------------------------------------------------------------------------------------------------------------------------------------------------------------------------------------------------------------------------------------------------------------------------------------------------------------------------------------------------------------------------------|
|                                                         | <p><b>Patient's health literacy:</b><br/>Vast majorities of HCWs stated that some patients refused to receive TTMS to manage their nonadherence behaviors due to poor health literacy and weak TB-related awareness.</p>                                                                                                                                                                                                                      | <p><i>work and often change their phone numbers...don't like TTMS. (HCW)</i><br/><i>I told him/her the dangerousness and seriousness of MDR-TB, he/she still didn't keep treatment, only told me: 'no money'. (HCW)</i><br/><i>I stopped treatment because I felt good about myself. (MDR-TB patient)</i><br/><i>Some (patients) don't prioritize their health and dislike our TTMS...they are aged and less educated...Some have very poor adherence to TB treatment. (HCW)</i></p>  |
| <p>External environment</p>                             | <p><b>Health insurance:</b><br/>All patients stated they still faced financial hardship even with health insurance. Most HCWs and leaders stated that the current health insurance for DS-TB patients cannot cover all medicines and examinations related to side-effect, and it is more inadequate for MDR-TB patients with longer treatment, which added financial burden among poor TB patients and led to hardship for TTMS delivery.</p> | <p><i>(After reimbursement,) medicines would cost hundreds, and the costs of CT scans can't be reimbursed. (MDR-TB patient)</i><br/><i>The health insurance of reimbursement of TB treatment is very strict, anti-TB drugs are free, and other liver protection medicines and tests are not. (HC leader)</i></p>                                                                                                                                                                      |
|                                                         | <p><b>Cross-sectional coordination:</b><br/>Majority HCWs and leaders reported the difficulties to conduct cross-sectional coordination for TTMS delivery, especially coordination from TB designated hospitals. One leader also stated a poor cross-sectional coordination between PHC sectors with the departments of education, public security, civil affair, and finance for TTMS delivery.</p>                                          | <p><i>It is hard to connect with TB designated hospitals' doctors, they are very busy. One patient stopped treatment and said it is doctors' advice...but I cannot confirm. (HCW)</i><br/><i>The department of finance, education, civil affairs, public security, and others, ... they are not highly motivated (to give us support in TTMS program). (CDC leader)</i></p>                                                                                                           |
|                                                         | <p><b>Social stigma:</b><br/>TB-related social stigma was mentioned by many HCWs. Urban and young patients with more concerns of privacy issue were more likely to refuse home-visit from HCWs.</p>                                                                                                                                                                                                                                           | <p><i>There is one patient, it's impossible to go to his/her home... due to privacy, he/she doesn't like people around know they have TB. (HCW)</i><br/><i>Some TB patients, especially urban and youth patients, don't like us to go to their home for home-visit... (They are) worried about how people around would think of them. (HCW)</i></p>                                                                                                                                   |
| <p>Implementation and Sustainability infrastructure</p> | <p><b>Performance assessment:</b><br/>All HCWs and some of the leaders stated that the performance assessment for TTMS may exist irrationality considering heavy workload. And leaders pointed out that this could lead to substandard TTMS, and hinder HCW's working enthusiastic.</p>                                                                                                                                                       | <p><i>(Performance) assessment is unreasonable, more works you do, more mistakes you make, and this is unfair. There are no rewards when you perform well...while, any negative feedbacks (such as patients' dissatisfactions with treatment costs) would affect our performance assessment. (HCW)</i><br/><i>The indexes are quite high (considering HCW's workload). Sometimes, the purpose becomes to complete indexes but not to really care about patients. (CDC leader)</i></p> |

Note: TTMS refers to tuberculosis treatment management service, TB refers to tuberculosis, HCW refers to healthcare workers, PHC refers to primary healthcare, BPHC refers to basic primary healthcare, DS-TB refers to drug-sensitive tuberculosis, DOT refers to directly observed therapy, MDR-TB refers to multidrug-resistant TB, CT refers to Computed Tomography.



1  
2  
3  
4  
5  
6  
7  
8  
9  
10  
11  
12  
13  
14  
15  
16  
17  
18  
19  
20  
21  
22  
23  
24  
25  
26  
27  
28  
29  
30  
31  
32  
33  
34  
35  
36  
37  
38  
39  
40  
41

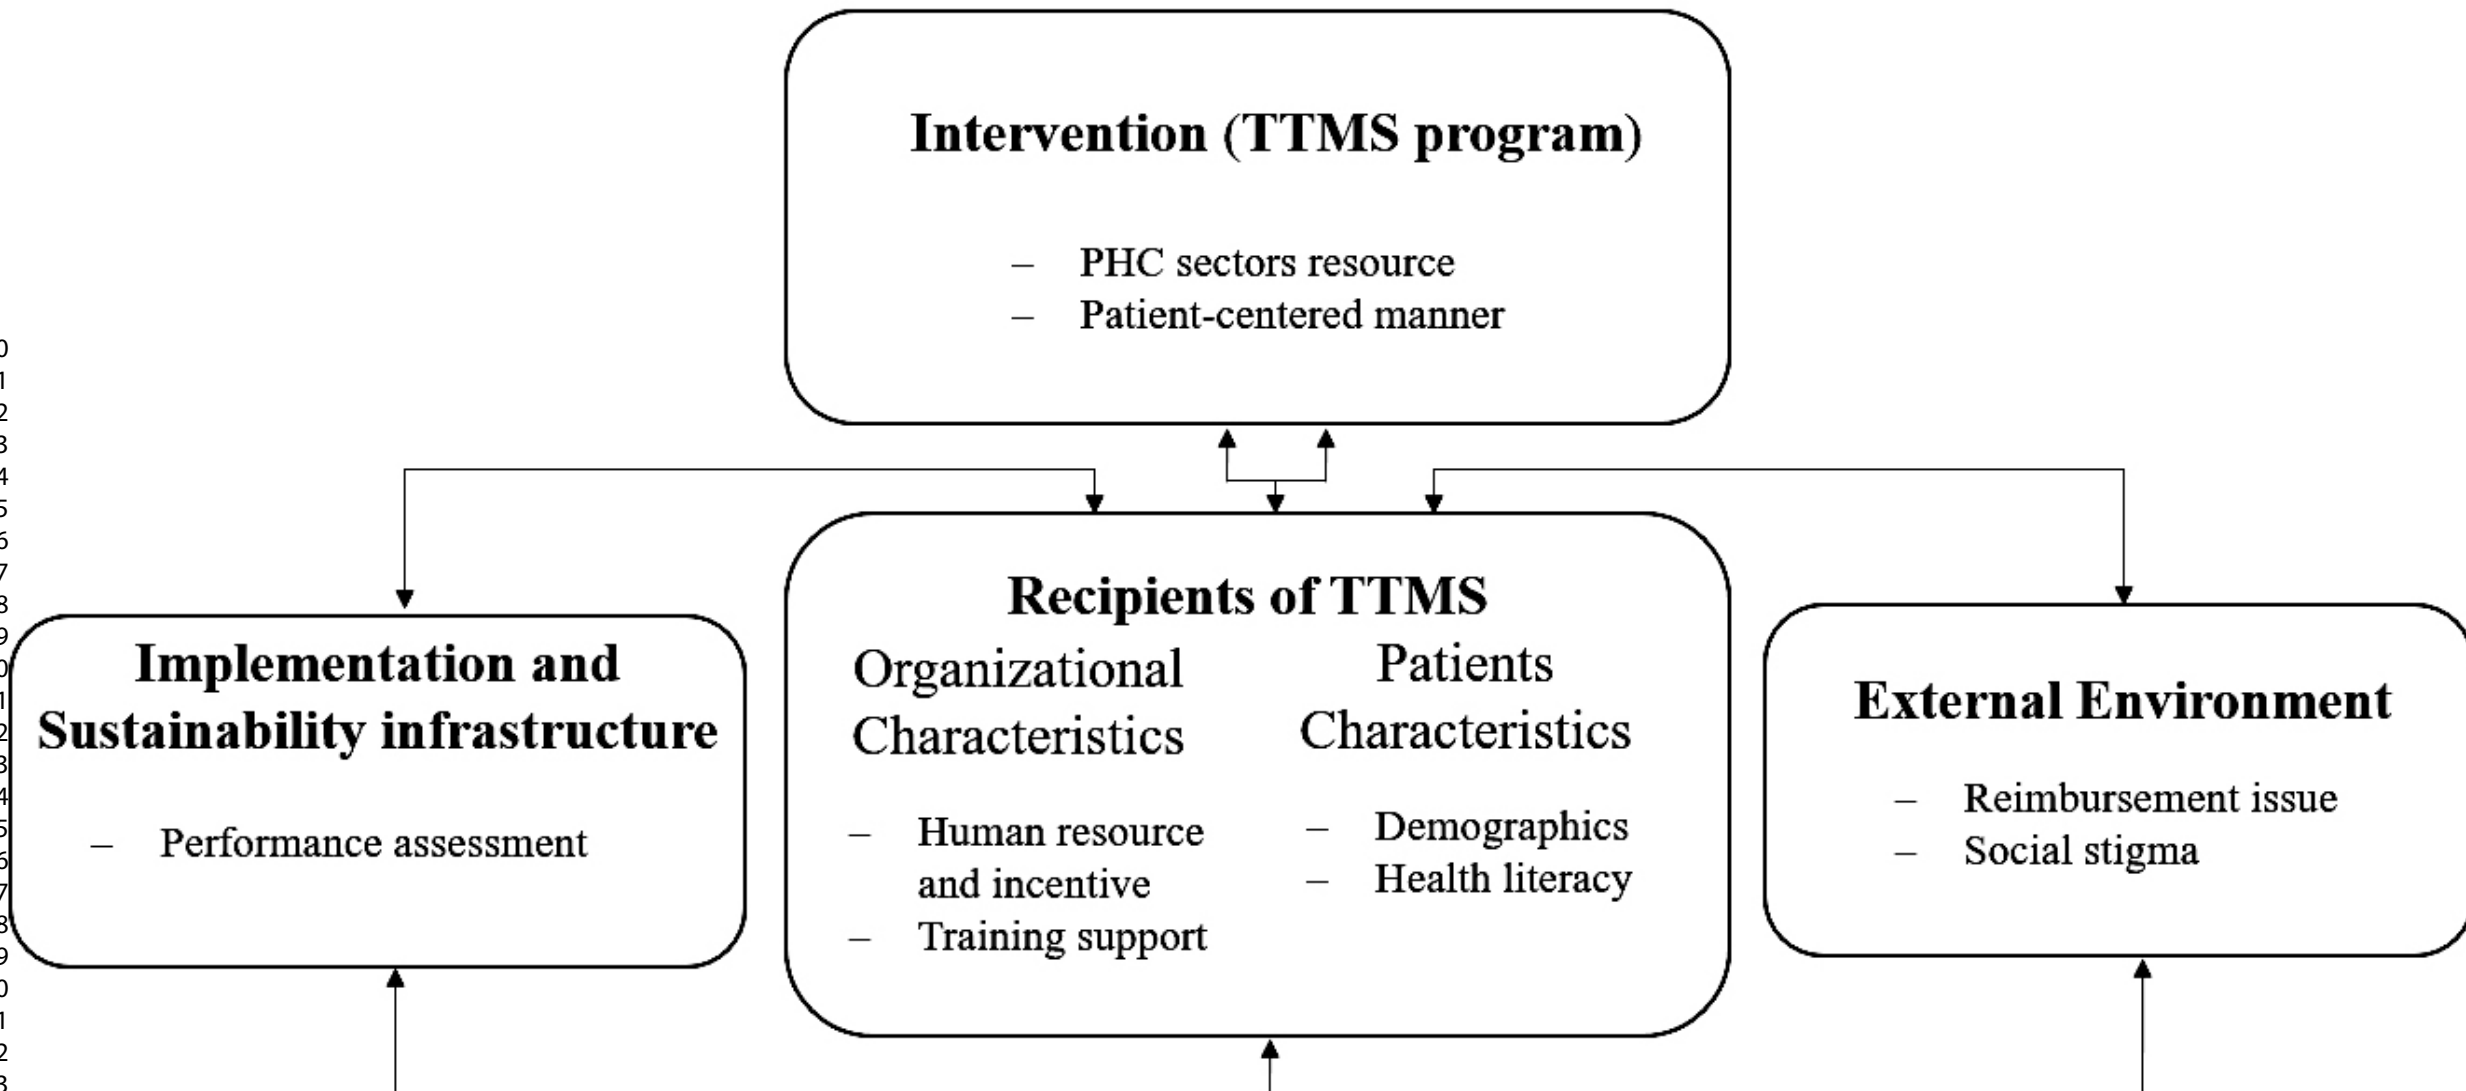

Figure 1: Adapted PRISM for barriers on TTMS delivery in PHC sectors

## Appendix 1: Chi-square test results

## Factors associated with TTMS with lower delivery rate

| Variable                                                | Patients' peer supervision establish (n=235) |        | Train patient to use smart tools to assist TTMS (n=236) |        | Intensive phase DOT (n=236) |        | Continuation phase DOT (n=236) |        | Regular medicine delivery (n=234) |        | Sputum sample collection (n=234) |        |
|---------------------------------------------------------|----------------------------------------------|--------|---------------------------------------------------------|--------|-----------------------------|--------|--------------------------------|--------|-----------------------------------|--------|----------------------------------|--------|
|                                                         | N(%)                                         | P(X2)  | N(%)                                                    | P(X2)  | N(%)                        | P(X2)  | N(%)                           | P(X2)  | N(%)                              | P(X2)  | N(%)                             | P(X2)  |
| <b>Gender</b>                                           |                                              | 0.025* |                                                         | 0.429  |                             | 0.370  |                                | 0.867  |                                   | 0.033* |                                  | 0.760  |
| Female                                                  | 115(74.7)                                    |        | 88(57.1)                                                |        | 81(52.6)                    |        | 81(52.6)                       |        | 97(63.8)                          |        | 68(44.2)                         |        |
| Male                                                    | 69(87.3)                                     |        | 50(62.5)                                                |        | 47(58.8)                    |        | 43(53.8)                       |        | 62(77.5)                          |        | 37(46.3)                         |        |
| <b>Age</b>                                              |                                              | 0.23   |                                                         | 0.496  |                             | 0.023* |                                | 0.478  |                                   | 0.261  |                                  | 0.950  |
| 20-29                                                   | 73(83.9)                                     |        | 47(53.4)                                                |        | 55(61.8)                    |        | 51(57.3)                       |        | 63(70.8)                          |        | 40(44.9)                         |        |
| 30-39                                                   | 60(78.9)                                     |        | 46(60.5)                                                |        | 37(49.3)                    |        | 36(48.0)                       |        | 46(61.3)                          |        | 31(41.9)                         |        |
| 40-50                                                   | 33(68.8)                                     |        | 28(58.3)                                                |        | 19(43.2)                    |        | 24(50.0)                       |        | 35(74.5)                          |        | 22(44.9)                         |        |
| >50                                                     | 9(75.0)                                      |        | 9(75.0)                                                 |        | 13(81.3)                    |        | 8(66.7)                        |        | 10(83.3)                          |        | 6(50.0)                          |        |
| <b>Education</b>                                        |                                              | 0.927  |                                                         | 0.607  |                             | 0.123  |                                | 0.247  |                                   | 0.815  |                                  | 0.139  |
| Technical secondary school and below                    | 40(76.9)                                     |        | 33(64.7)                                                |        | 27(51.9)                    |        | 25(48.1)                       |        | 36(70.6)                          |        | 25(49.0)                         |        |
| College                                                 | 112(79.4)                                    |        | 81(57.0)                                                |        | 84(59.2)                    |        | 81(57.0)                       |        | 94(66.7)                          |        | 67(47.2)                         |        |
| University and above                                    | 32(78.0)                                     |        | 24(57.1)                                                |        | 17(41.5)                    |        | 18(43.9)                       |        | 29(70.7)                          |        | 13(31.0)                         |        |
| <b>Regions</b>                                          |                                              | 0.468  |                                                         | 0.323  |                             | 0.367  |                                | 0.399  |                                   | 0.360  |                                  | 0.820  |
| Relatively developed                                    | 54(77.1)                                     |        | 47(66.2)                                                |        | 37(53.6)                    |        | 38(55.1)                       |        | 46(67.6)                          |        | 32(45.1)                         |        |
| Medium developed                                        | 66(75.9)                                     |        | 48(55.2)                                                |        | 53(60.2)                    |        | 50(56.8)                       |        | 64(73.6)                          |        | 41(47.1)                         |        |
| Less developed                                          | 65(83.3)                                     |        | 44(65.4)                                                |        | 39(49.4)                    |        | 37(46.8)                       |        | 50(63.3)                          |        | 33(42.3)                         |        |
| <b>Primary Health Sector Type</b>                       |                                              | 0.044* |                                                         | 0.529  |                             | 0.574  |                                | 0.586  |                                   | 0.386  |                                  | 0.607  |
| Township health center                                  | 141(82.0)                                    |        | 104(60.1)                                               |        | 97(55.7)                    |        | 94(54.0)                       |        | 121(69.9)                         |        | 79(45.9)                         |        |
| Community health center                                 | 44(69.8)                                     |        | 35(55.6)                                                |        | 32(51.6)                    |        | 31(50.0)                       |        | 39(63.9)                          |        | 27(42.2)                         |        |
| <b>Professional Title</b>                               |                                              | 0.317  |                                                         | 0.591  |                             | 0.010* |                                | 0.036* |                                   | 0.801  |                                  | 0.019* |
| Non                                                     | 67(82.7)                                     |        | 46(56.8)                                                |        | 37(45.7)                    |        | 36(44.4)                       |        | 52(64.2)                          |        | 30(37.0)                         |        |
| Junior                                                  | 82(78.8)                                     |        | 65(62.5)                                                |        | 70(66.7)                    |        | 67(63.8)                       |        | 73(70.2)                          |        | 58(55.8)                         |        |
| Intermediate                                            | 19(67.9)                                     |        | 15(53.6)                                                |        | 12(42.9)                    |        | 13(46.4)                       |        | 17(63.0)                          |        | 9(32.1)                          |        |
| Deputy senior                                           | 2(66.7)                                      |        | 1(33.3)                                                 |        | 2(66.7)                     |        | 2(66.7)                        |        | 2(66.7)                           |        | 1(33.3)                          |        |
| <b>Times of training received in the past six month</b> |                                              | 0.299  |                                                         | 0.007* |                             | 0.147  |                                | 0.214  |                                   | 0.963  |                                  | 0.022* |
| 0                                                       | 11(91.7)                                     |        | 10(83.3)                                                |        | 8(66.7)                     |        | 8(66.7)                        |        | 8(72.7)                           |        | 7(58.3)                          |        |
| 1                                                       | 37(78.7)                                     |        | 28(57.1)                                                |        | 22(44.9)                    |        | 21(42.9)                       |        | 34(69.4)                          |        | 20(41.7)                         |        |
| 2                                                       | 93(76.2)                                     |        | 68(56.2)                                                |        | 63(51.6)                    |        | 62(50.8)                       |        | 82(67.8)                          |        | 46(37.4)                         |        |
| 3                                                       | 31(88.6)                                     |        | 27(77.1)                                                |        | 23(67.6)                    |        | 22(64.7)                       |        | 22(64.7)                          |        | 23(67.6)                         |        |
| >3                                                      | 13(68.4)                                     |        | 6(31.6)                                                 |        | 13(68.4)                    |        | 12(63.2)                       |        | 14(73.7)                          |        | 10(52.6)                         |        |
| <b>Working satisfaction</b>                             |                                              | 0.000* |                                                         | 0.042* |                             | 0.016* |                                | 0.012* |                                   | 0.008* |                                  | 0.027* |
| Dissatisfied                                            | 32(68.1)                                     |        | 27(56.3)                                                |        | 20(43.5)                    |        | 20(43.5)                       |        | 30(66.7)                          |        | 19 (40.4)                        |        |
| General                                                 | 26(60.5)                                     |        | 20(45.5)                                                |        | 19(43.2)                    |        | 17(38.6)                       |        | 22(50.0)                          |        | 14 (31.8)                        |        |
| Satisfied                                               | 76(85.4)                                     |        | 51(57.3)                                                |        | 52(57.8)                    |        | 51(56.7)                       |        | 64(71.9)                          |        | 39 (43.8)                        |        |

Very satisfied 50(92.6) 39(73.6) 38(70.4) 37(68.5) 44(81.5) 33(61.1)

Note: \*p<0.05, TTMS refers to tuberculosis treatment management service, DOT refers to directly observed therapy, MDR-TB refers to multi-drug resistance tuberculosis, Lower delivery rate refers to a rate below 90%, DOT refers to directly observed therapy

**Factors associated with TTMS with lower delivery rate (Continue)**

| Variable                             | Providing food or transport assistances for poor TB patient (n=230) | Providing DOT for migrant TB patient at their convenient time (n=235) | Providing subsistence allowance or psychological support for migrant patient (n=236) | Providing injection treatment for MDR-TB patient (n=234) | Providing supervision for newly released prison patient (n=236) | Referring TB patient with mental/psychological problems or alcohol/drug addiction (n=235) | Training cured TB patients to provide peer education (n=237) | Establishing platform for TB patients communication (n=237) |          |       |           |       |           |        |          |       |
|--------------------------------------|---------------------------------------------------------------------|-----------------------------------------------------------------------|--------------------------------------------------------------------------------------|----------------------------------------------------------|-----------------------------------------------------------------|-------------------------------------------------------------------------------------------|--------------------------------------------------------------|-------------------------------------------------------------|----------|-------|-----------|-------|-----------|--------|----------|-------|
|                                      | N(%)                                                                | P(X2)                                                                 | N(%)                                                                                 | P(X2)                                                    | N(%)                                                            | P(X2)                                                                                     | N(%)                                                         | P(X2)                                                       | N(%)     | P(X2) | N(%)      | P(X2) | N(%)      | P(X2)  |          |       |
| <b>Gender</b>                        |                                                                     | 0.215                                                                 |                                                                                      | 0.153                                                    |                                                                 | 0.313                                                                                     |                                                              | 0.274                                                       |          | 0.669 |           | 0.431 |           | 0.957  |          | 0.845 |
| Female                               | 40(51.3)                                                            |                                                                       | 72(91.1)                                                                             |                                                          | 36(45.0)                                                        |                                                                                           | 37(46.3)                                                     |                                                             | 46(57.5) |       | 59(74.7)  |       | 70(87.5)  |        | 47(58.8) |       |
| Male                                 | 64(42.7)                                                            |                                                                       | 130(84.4)                                                                            |                                                          | 80(51.9)                                                        |                                                                                           | 59(38.8)                                                     |                                                             | 93(60.4) |       | 122(79.2) |       | 136(87.7) |        | 89(57.4) |       |
| <b>Age</b>                           |                                                                     | 0.174                                                                 |                                                                                      | 0.573                                                    |                                                                 | 0.243                                                                                     |                                                              | 0.561                                                       |          | 0.408 |           | 0.242 |           | 0.016* |          | 0.783 |
| <30                                  | 43(49.4)                                                            |                                                                       | 74(83.1)                                                                             |                                                          | 50(56.8)                                                        |                                                                                           | 37(42.5)                                                     |                                                             | 57(64.0) |       | 71(79.8)  |       | 84(94.4)  |        | 55(61.8) |       |
| 30-39                                | 26(35.1)                                                            |                                                                       | 65(86.7)                                                                             |                                                          | 32(42.1)                                                        |                                                                                           | 26(34.2)                                                     |                                                             | 40(52.6) |       | 56(73.7)  |       | 61(80.3)  |        | 42(55.3) |       |
| 40-50                                | 25(53.2)                                                            |                                                                       | 44(91.7)                                                                             |                                                          | 22(45.8)                                                        |                                                                                           | 21(43.8)                                                     |                                                             | 26(54.2) |       | 39(83.0)  |       | 44(91.7)  |        | 28(58.3) |       |
| >50                                  | 6(50.0)                                                             |                                                                       | 10(83.3)                                                                             |                                                          | 7(58.3)                                                         |                                                                                           | 6(50.0)                                                      |                                                             | 8(66.7)  |       | 7(58.3)   |       | 9(75.0)   |        | 6(50.0)  |       |
| <b>Education</b>                     |                                                                     | 0.847                                                                 |                                                                                      | 0.526                                                    |                                                                 | 0.352                                                                                     |                                                              | 0.198                                                       |          | 0.073 |           | 0.189 |           | 0.136  |          | 0.194 |
| Technical secondary school and below | 22(44.0)                                                            |                                                                       | 45(88.2)                                                                             |                                                          | 23(44.2)                                                        |                                                                                           | 23(45.1)                                                     |                                                             | 35(68.6) |       | 43(84.3)  |       | 47(90.4)  |        | 32(61.5) |       |
| College                              | 64(46.4)                                                            |                                                                       | 123(87.2)                                                                            |                                                          | 75(53.2)                                                        |                                                                                           | 60(42.9)                                                     |                                                             | 84(59.2) |       | 110(77.5) |       | 127(89.4) |        | 85(59.9) |       |
| University and above                 | 17(41.5)                                                            |                                                                       | 34(81.0)                                                                             |                                                          | 18(42.9)                                                        |                                                                                           | 12(28.6)                                                     |                                                             | 19(45.2) |       | 28(68.3)  |       | 33(78.6)  |        | 19(45.2) |       |
| <b>Regions</b>                       |                                                                     | 0.277                                                                 |                                                                                      | 0.327                                                    |                                                                 | 0.104                                                                                     |                                                              | 0.613                                                       |          | 0.299 |           | 0.343 |           | 0.048  |          | 0.737 |
| Relatively developed                 | 28(40.6)                                                            |                                                                       | 63(90.0)                                                                             |                                                          | 36(50.7)                                                        |                                                                                           | 31(44.3)                                                     |                                                             | 44(62.9) |       | 56(80.0)  |       | 57(80.3)  |        | 39(54.9) |       |
| Medium developed                     | 36(42.4)                                                            |                                                                       | 77(87.5)                                                                             |                                                          | 49(57.0)                                                        |                                                                                           | 36(42.4)                                                     |                                                             | 54(62.1) |       | 70(80.5)  |       | 81(93.1)  |        | 53(60.9) |       |
| Less developed                       | 40(52.6)                                                            |                                                                       | 63(81.8)                                                                             |                                                          | 32(40.5)                                                        |                                                                                           | 29(36.7)                                                     |                                                             | 41(51.9) |       | 56(71.8)  |       | 70(88.6)  |        | 45(57.0) |       |



|                                                         |          | 0.885     | 0.498    | 0.613    | 0.394     | 0.127     | 0.528     | 0.157     | 0.768 |
|---------------------------------------------------------|----------|-----------|----------|----------|-----------|-----------|-----------|-----------|-------|
| <b>Primary Health Sector Type</b>                       |          |           |          |          |           |           |           |           |       |
| 2 Township health center                                | 76(45.5) | 147(85.5) | 87(50.6) | 73(42.7) | 107(61.8) | 135(78.5) | 115(89.6) | 101(58.4) |       |
| 3 Community health center                               | 28(44.4) | 56(88.9)  | 30(46.9) | 23(36.5) | 32(50.8)  | 47(74.6)  | 53(82.8)  | 36(56.3)  |       |
| <b>Professional Title</b>                               |          | 0.438     | 0.327    | 0.038*   | 0.004*    | 0.043*    | 0.870     | 0.683     | 0.789 |
| 6 Non                                                   | 35(43.8) | 67(82.7)  | 44(62.0) | 23(28.4) | 47(58.0)  | 61(76.3)  | 71(87.7)  | 43(53.1)  |       |
| 7 Junior                                                | 50(50.0) | 92(89.3)  | 26(47.3) | 55(53.4) | 68(64.8)  | 80(76.2)  | 94(88.7)  | 64(60.4)  |       |
| 8 Intermediate                                          | 9(33.3)  | 22(78.6)  | 16(53.3) | 9(33.3)  | 10(37.0)  | 22(81.5)  | 22(81.5)  | 16(59.3)  |       |
| 9 Deputy senior                                         | 1(33.3)  | 3(100.0)  | 31(38.8) | 1(33.3)  | 1(33.3)   | 2(66.7)   | 3(100.0)  | 2(66.7)   |       |
| <b>Times of training received in the past six month</b> |          | 0.256     | 0.579    | 0.497    | 0.001*    | 0.022*    | 0.140     | 0.788     | 0.099 |
| 13 0                                                    | 6(54.5)  | 9(81.8)   | 7(58.3)  | 6(54.5)  | 8(72.7)   | 11(100.0) | 10(83.3)  | 6(50.0)   |       |
| 14 1                                                    | 21(43.8) | 41(83.7)  | 23(46.9) | 15(3.5)  | 22(44.9)  | 36(73.5)  | 42(85.7)  | 30(61.2)  |       |
| 15 2                                                    | 46(39.3) | 103(85.1) | 55(45.5) | 42(35.0) | 70(57.4)  | 90(74.4)  | 106(86.9) | 63(51.6)  |       |
| 16 3                                                    | 20(57.1) | 33(94.3)  | 21(60.0) | 25(71.4) | 28(80.0)  | 31(88.6)  | 32(91.4)  | 27(77.1)  |       |
| 17 >3                                                   | 11(57.9) | 17(89.5)  | 11(57.9) | 8(42.1)  | 11(57.9)  | 14(73.7)  | 18(94.7)  | 11(57.9)  |       |
| <b>Working satisfaction</b>                             |          | 0.094     | 0.027*   | 0.115    | 0.263     | 0.452     | 0.021*    | 0.114     | 0.054 |
| 20 Dissatisfied                                         | 19(40.4) | 38(80.9)  | 18(37.5) | 16(34.0) | 24(51.1)  | 34 (72.3) | 40(83.3)  | 24(50.0)  |       |
| 21 General                                              | 15(35.7) | 33(76.7)  | 23(52.3) | 16(36.4) | 25(56.8)  | 28 (63.6) | 36(81.8)  | 21(47.7)  |       |
| 22 Satisfied                                            | 68(43.7) | 78(87.6)  | 42(47.7) | 35(40.2) | 53(59.6)  | 70 (79.5) | 25(50.0)  | 52(58.4)  |       |
| 23 Very satisfied                                       | 31(59.6) | 52(96.3)  | 33(61.1) | 28(51.9) | 36(66.7)  | 48 (88.9) | 52(96.3)  | 39(72.2)  |       |

24 Note: \*p<0.05, TTMS refers to tuberculosis treatment management service, DOT refers to directly observed therapy, MDR-TB refers to multi-drug resistance tuberculosis, Lower delivery rate refers to a rate below 90%, DOT refers to directly observed therapy

25

26

27

28

29

30

31

32

33

34

35

36

37

38

39

40

41

42

43

44

45

46

**STROBE 2007 (v4) Statement—Checklist of items that should be included in reports of *cross-sectional studies***

| Section/Topic                | Item # | Recommendation                                                                                                                                                                       | Reported on page # |
|------------------------------|--------|--------------------------------------------------------------------------------------------------------------------------------------------------------------------------------------|--------------------|
| <b>Title and abstract</b>    | 1      | (a) Indicate the study’s design with a commonly used term in the title or the abstract                                                                                               | 2                  |
|                              |        | (b) Provide in the abstract an informative and balanced summary of what was done and what was found                                                                                  | 2                  |
| <b>Introduction</b>          |        |                                                                                                                                                                                      |                    |
| Background/rationale         | 2      | Explain the scientific background and rationale for the investigation being reported                                                                                                 | 4                  |
| Objectives                   | 3      | State specific objectives, including any prespecified hypotheses                                                                                                                     | 5                  |
| <b>Methods</b>               |        |                                                                                                                                                                                      |                    |
| Study design                 | 4      | Present key elements of study design early in the paper                                                                                                                              | 6                  |
| Setting                      | 5      | Describe the setting, locations, and relevant dates, including periods of recruitment, exposure, follow-up, and data collection                                                      | 7                  |
| Participants                 | 6      | (a) Give the eligibility criteria, and the sources and methods of selection of participants                                                                                          | 8, 9               |
| Variables                    | 7      | Clearly define all outcomes, exposures, predictors, potential confounders, and effect modifiers. Give diagnostic criteria, if applicable                                             | 8, 9               |
| Data sources/<br>measurement | 8*     | For each variable of interest, give sources of data and details of methods of assessment (measurement). Describe comparability of assessment methods if there is more than one group | 10, 11             |
| Bias                         | 9      | Describe any efforts to address potential sources of bias                                                                                                                            | 9                  |
| Study size                   | 10     | Explain how the study size was arrived at                                                                                                                                            | 9                  |
| Quantitative variables       | 11     | Explain how quantitative variables were handled in the analyses. If applicable, describe which groupings were chosen and why                                                         | 10                 |
| Statistical methods          | 12     | (a) Describe all statistical methods, including those used to control for confounding                                                                                                | 10                 |
|                              |        | (b) Describe any methods used to examine subgroups and interactions                                                                                                                  | 10                 |
|                              |        | (c) Explain how missing data were addressed                                                                                                                                          | 10                 |
|                              |        | (d) If applicable, describe analytical methods taking account of sampling strategy                                                                                                   | 10                 |
|                              |        | (e) Describe any sensitivity analyses                                                                                                                                                | 10                 |
| <b>Results</b>               |        |                                                                                                                                                                                      |                    |

|                          |     |                                                                                                                                                                                                                                                                                                                                                                                                               |       |
|--------------------------|-----|---------------------------------------------------------------------------------------------------------------------------------------------------------------------------------------------------------------------------------------------------------------------------------------------------------------------------------------------------------------------------------------------------------------|-------|
| Participants             | 13* | (a) Report numbers of individuals at each stage of study—eg numbers potentially eligible, examined for eligibility, confirmed eligible, included in the study, completing follow-up, and analysed<br>(b) Give reasons for non-participation at each stage<br>(c) Consider use of a flow diagram                                                                                                               | 11,12 |
| Descriptive data         | 14* | (a) Give characteristics of study participants (eg demographic, clinical, social) and information on exposures and potential confounders<br>(b) Indicate number of participants with missing data for each variable of interest                                                                                                                                                                               | 11,12 |
| Outcome data             | 15* | Report numbers of outcome events or summary measures                                                                                                                                                                                                                                                                                                                                                          | 12-15 |
| Main results             | 16  | (a) Give unadjusted estimates and, if applicable, confounder-adjusted estimates and their precision (eg, 95% confidence interval). Make clear which confounders were adjusted for and why they were included<br>(b) Report category boundaries when continuous variables were categorized<br>(c) If relevant, consider translating estimates of relative risk into absolute risk for a meaningful time period |       |
| Other analyses           | 17  | Report other analyses done—eg analyses of subgroups and interactions, and sensitivity analyses                                                                                                                                                                                                                                                                                                                |       |
| <b>Discussion</b>        |     |                                                                                                                                                                                                                                                                                                                                                                                                               |       |
| Key results              | 18  | Summarise key results with reference to study objectives                                                                                                                                                                                                                                                                                                                                                      | 16-20 |
| Limitations              | 19  | Discuss limitations of the study, taking into account sources of potential bias or imprecision. Discuss both direction and magnitude of any potential bias                                                                                                                                                                                                                                                    | 21    |
| Interpretation           | 20  | Give a cautious overall interpretation of results considering objectives, limitations, multiplicity of analyses, results from similar studies, and other relevant evidence                                                                                                                                                                                                                                    | 21    |
| Generalisability         | 21  | Discuss the generalisability (external validity) of the study results                                                                                                                                                                                                                                                                                                                                         | 21    |
| <b>Other information</b> |     |                                                                                                                                                                                                                                                                                                                                                                                                               |       |
| Funding                  | 22  | Give the source of funding and the role of the funders for the present study and, if applicable, for the original study on which the present article is based                                                                                                                                                                                                                                                 | 22    |

\*Give information separately for cases and controls in case-control studies and, if applicable, for exposed and unexposed groups in cohort and cross-sectional studies.

**Note:** An Explanation and Elaboration article discusses each checklist item and gives methodological background and published examples of transparent reporting. The STROBE checklist is best used in conjunction with this article (freely available on the Web sites of PLoS Medicine at <http://www.plosmedicine.org/>, Annals of Internal Medicine at <http://www.annals.org/>, and Epidemiology at <http://www.epidem.com/>). Information on the STROBE Initiative is available at [www.strobe-statement.org](http://www.strobe-statement.org).
